# Supplementary material for: Experiences and perception of character strengths among patients with breast cancer in China: a qualitative study
Source: PubMed Central journal article supplement — BMJ Open. 2022 Oct 28;12(10):e061994. doi: 10.1136/bmjopen-2022-061994 (PMC9621164; doi:10.1136/bmjopen-2022-061994), 2022-10-28
Supplement: bmjopen-2022-061994.draft_revisions.pdf [file bmjopen-2022-061994.draft_revisions.pdf]

# BMJ Open

BMJ Open is committed to open peer review. As part of this commitment we make the peer review history of every article we publish publicly available.

When an article is published we post the peer reviewers' comments and the authors' responses online. We also post the versions of the paper that were used during peer review. These are the versions that the peer review comments apply to.

The versions of the paper that follow are the versions that were submitted during the peer review process. They are not the versions of record or the final published versions. They should not be cited or distributed as the published version of this manuscript.

BMJ Open is an open access journal and the full, final, typeset and author-corrected version of record of the manuscript is available on our site with no access controls, subscription charges or pay-per-view fees (<http://bmjopen.bmj.com>).

If you have any questions on BMJ Open's open peer review process please email [info.bmjopen@bmj.com](mailto:info.bmjopen@bmj.com)

# BMJ Open

## Experiences and perception of character strengths among patients with breast cancer in China: A qualitative study

|                               |                                                                                                                                                                               |
|-------------------------------|-------------------------------------------------------------------------------------------------------------------------------------------------------------------------------|
| Journal:                      | <i>BMJ Open</i>                                                                                                                                                               |
| Manuscript ID                 | bmjopen-2022-061994                                                                                                                                                           |
| Article Type:                 | Original research                                                                                                                                                             |
| Date Submitted by the Author: | 15-Feb-2022                                                                                                                                                                   |
| Complete List of Authors:     | Yan, Tingting; Peking University<br>Chan, Carmen Wing Han; The Chinese University of Hong Kong<br>Chow, Ka; Chinese University of Hong Kong,<br>Li, Mingzi; Peking University |
| Keywords:                     | Breast tumours < ONCOLOGY, Adult palliative care < PALLIATIVE CARE, PSYCHIATRY, QUALITATIVE RESEARCH, Adult psychiatry < PSYCHIATRY                                           |
|                               |                                                                                                                                                                               |

SCHOLARONE™  
Manuscripts

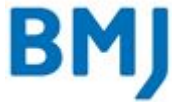

I, the Submitting Author has the right to grant and does grant on behalf of all authors of the Work (as defined in the below author licence), an exclusive licence and/or a non-exclusive licence for contributions from authors who are: i) UK Crown employees; ii) where BMJ has agreed a CC-BY licence shall apply, and/or iii) in accordance with the terms applicable for US Federal Government officers or employees acting as part of their official duties; on a worldwide, perpetual, irrevocable, royalty-free basis to BMJ Publishing Group Ltd ("BMJ") its licensees and where the relevant Journal is co-owned by BMJ to the co-owners of the Journal, to publish the Work in this journal and any other BMJ products and to exploit all rights, as set out in our [licence](#).

The Submitting Author accepts and understands that any supply made under these terms is made by BMJ to the Submitting Author unless you are acting as an employee on behalf of your employer or a postgraduate student of an affiliated institution which is paying any applicable article publishing charge ("APC") for Open Access articles. Where the Submitting Author wishes to make the Work available on an Open Access basis (and intends to pay the relevant APC), the terms of reuse of such Open Access shall be governed by a Creative Commons licence – details of these licences and which [Creative Commons](#) licence will apply to this Work are set out in our licence referred to above.

Other than as permitted in any relevant BMJ Author's Self Archiving Policies, I confirm this Work has not been accepted for publication elsewhere, is not being considered for publication elsewhere and does not duplicate material already published. I confirm all authors consent to publication of this Work and authorise the granting of this licence.

1  
2  
3  
4 **·Experiences and perception of character strengths among patients**  
5  
6  
7 **with breast cancer in China: A qualitative study**  
8  
9

10  
11 Tingting YAN **PhD**<sup>1</sup>;

12 Carmen W. H. CHAN **PhD, Professor**<sup>2</sup>;

13 Ka Ming CHOW **DNur, Assistant Professor**<sup>2</sup>;

14 Mingzi Li, **PhD, Professor**<sup>1</sup>.

15  
16  
17  
18  
19  
20 **Affiliations:**

21 1 School of Nursing, Peking University, Beijing, China.

22 2 The Nethersole School of Nursing, The Chinese University of Hong Kong, New  
23 Territories, Hong Kong SAR, China

24  
25  
26  
27  
28 **Correspondence:**

29 Dr. Mingzi Li, School of Nursing, Peking University, No. 38 Xueyuan Road, Haidian  
30 District, 100191 Beijing, China.

31 **E-mail:** [realityru22@qq.com](mailto:realityru22@qq.com)  
32  
33  
34  
35  
36  
37  
38  
39  
40  
41  
42  
43  
44  
45  
46  
47  
48  
49  
50  
51  
52  
53  
54  
55  
56  
57  
58  
59  
60

## Abstract

**Objective** To explore the patients' experiences on character strengths that Chinese patients experience after the diagnosis of breast cancer.

**Design** A qualitative, exploratory study using semi-structured interviews based on the patients' lived experience with diagnosed with breast cancer. Ethics approval was granted. Interviews were audio-recorded and transcribed verbatim. Values in Action Classification of Strengths provided conceptual framework for analysing strengths. Directed content analysis based on the classification of strengths and framework analysis were used to analyse transcribed data. The Standards for Reporting Qualitative Research (SRQR) guideline was followed.

**Setting** The Second Affiliated Hospital of Zhengzhou University and Henan Provincial Cancer Hospital in China.

**Participants** Adult patients over 18 years, diagnosed with breast cancer between October 2019 and December 2020 were recruited. We used purposive sample method to collected data from 24 participants diagnosed with breast cancer.

**Results** Six themes (virtues) emerged from our analysis. In addition, two new subthemes (character strengths) emerged in this study, selflessness and pragmatism respectively. Patients with breast cancer described a large repertoire of character strengths they used or wished for during survivorship, including gratitude, hope, humility, kindness, humor, honesty, and forgiveness. Cultural values (e.g. collectivism, familism, Confucianism and Buddhist beliefs) helped structure the experiences of Chinese patients' character strengths. Patients wanted their character strengths to be more noticed, appreciated and encouraged by others and reported their psychological trajectory of using personal strengths.

1  
2  
3 **Conclusion** The findings indicated that patients with breast cancer believing character  
4 strengths are important to them. Medical staff should pay more attention to motivating  
5 and cultivating breast cancer patients' character strengths. Attention to make strength-  
6 based practices workable in clinical health promotion programmes is necessary. The  
7 healthcare system should develop tailored individualised psychological services that  
8 specifically address patients' needs for the application of personalised character  
9 strengths.  
10  
11  
12  
13  
14  
15  
16  
17  
18  
19  
20

## 21 **KEYWORDS**

22  
23  
24 Breast cancer, character strengths, descriptive research, female, framework analysis,  
25 psycho-oncology, well-being, individualised service  
26  
27  
28  
29  
30

## 31 **Strengths and limitations of this study**

- 32  
33 ▶ To our knowledge, this is the first qualitative study to explore the patients'  
34 experience on character strengths for breast cancer.  
35  
36  
37 ▶ The qualitative design was used to explore the breast cancer patients' complex  
38 experiences, beliefs and behaviours on character strengths.  
39  
40  
41  
42 ▶ The study findings can be used to inform delivery of strength-based care and  
43 individualised psychological support provided to patients with breast cancer.  
44  
45  
46 ▶ As qualitative methods prohibit generalisation, despite the data saturation achieved  
47 in this study, there are results regarding transferability to other patients and different  
48 settings that should be interpreted with caution.  
49  
50  
51  
52  
53  
54  
55  
56  
57  
58  
59  
60

## Introduction

Strength-based approaches are receiving increasing international attention [1], and are being applied to solve longitudinal clinical problems, such as promoting well-being and limiting ill-health [2]. Recognising and using individuals' strengths leads to positive outcomes, such as coping, recovery and greater meaning in life [3]. Instead of focusing on problems [4], researchers have proposed that character strengths should be incorporated into clinical practice to help clients enhance well-being [5].

Understanding personal strengths and supporting their use in health behaviours can help cancer patients improve their well-being [6]. In one practical case, strength-based approaches were adopted by clinicians to help breast cancer patients deal with the continuing challenges of survivorship [7].

Problem-oriented health care methods often overlook patients' strengths. The character strengths of patients with breast cancer have consequently received little attention [8]. Moreover, the majority of studies on character strengths have been conducted in Western countries [8,9]. The experiences and perception of character strengths among patients with breast cancer vary contextually, and the results of previous studies may not be directly applicable to Chinese breast cancer patients due to their social and cultural differences from Western patients [10].

Character is the positive and socially valued elements of personality, which have a moral component [11]. Character strengths are the core theme of positive psychology, and are a cluster of positive traits or dispositions manifested in values,

1  
2  
3  
4 thoughts, feelings, and behaviours. These personal strengths involve positive  
5  
6 psychological qualities referring to the self, others and the world [12].  
7

8  
9 Character strengths promote the individual's positive cognition, emotions, and  
10  
11 behaviours. Concentrating on strengths allows individuals to focus on more than  
12  
13 avoiding distress or disorder [13]. Previous studies have demonstrated that character  
14  
15 strengths are positively associated with quality of life, well-being, happiness and  
16  
17 general health [14]. Evidence is increasing that people who use their strengths on a  
18  
19 regular basis have higher levels of well-being [15]. However, medical staff and  
20  
21 caregivers tend to underestimate the personal strengths of cancer patients [16].  
22  
23 Standardised, problem-oriented care may diminish patients' chances of achieving the  
24  
25 best possible recovery [17].  
26  
27  
28  
29  
30  
31  
32  
33  
34

### 35 **Theoretical framework**

36  
37 The most extensively researched model of character strengths is the Values in  
38  
39 Action Classification of Strengths and Virtues (VIA classification) [12]. The VIA  
40  
41 classification is a theory-driven framework comprising 24 character strengths  
42  
43 conceptually organised as reflections of six virtues: wisdom, courage, humanity,  
44  
45 justice, temperance and transcendence. Studies of different cultures have revealed  
46  
47 character strengths in different populations, including adolescents [18], college  
48  
49 students [19], adults [11] and the elderly [2]. The classification model has been  
50  
51 validated in 75 nations, with each sample including at least 150 respondents; these  
52  
53 findings suggest substantial cross-cultural similarity in strengths [20]. Virtues are  
54  
55  
56  
57  
58  
59  
60



1  
2  
3  
4 classes of character strengths that show individual differences but relative cross-  
5  
6 cultural stability [21]. The character strengths perspective has been recognised in the  
7  
8 field of psychological counselling and rehabilitation as a way to understand  
9  
10 psychosocial adaptation to chronic diseases, especially cancer [22]. Because chronic  
11  
12 diseases manifest themselves through a wide variety of symptoms and functional  
13  
14 limitations [23], the specific meaning of character strengths are likely to vary across  
15  
16 specific illnesses, cultural contexts and individuals. The six core virtue categories are  
17  
18 universal, but these strengths are based on theoretical foundations [24]. Given that  
19  
20 culture plays an important role in individuals' values, assumptions and needs [25], the  
21  
22 character strengths of breast cancer patients may have different meanings and  
23  
24 manifestations across different cultures. Moreover, researchers have highlighted the  
25  
26 specific differences in the mental functioning of patients with various diseases and  
27  
28 that of healthy individuals [26]. Therefore, a study of the character strengths of breast  
29  
30 cancer patients within the Chinese context is expected to further strengthen the  
31  
32 theoretical VIA classification.  
33  
34  
35  
36  
37  
38  
39  
40  
41  
42

43 The evidence so far indicates that character strengths are a helpful personal  
44  
45 resource [2]. However, there is a gap in the literature concerning how breast cancer  
46  
47 patients identify their own strengths and use them. The applicability of the VIA  
48  
49 classification among Chinese breast cancer patients is still unclear. Cultural values,  
50  
51 such as collectivism, the importance of family, Confucianism and Buddhism could  
52  
53 strongly determine how character strengths are expressed and the associated  
54  
55 behaviour patterns. For example, Confucianism is a uniquely Chinese cultural concept  
56  
57  
58  
59  
60

1  
2  
3  
4 that influences the definition of character strengths. This means that cultural factors  
5  
6 play an important role in the theory of strengths. In this study, we explore the  
7  
8 experiences and perception of character strengths among Chinese women with breast  
9  
10 cancer.  
11  
12  
13  
14  
15  
16

## 17 **Methods**

### 18 **Study design and population**

19  
20  
21  
22 In this qualitative study, we use a descriptive and exploratory approach to  
23  
24 uncover aspects of the experiences and perceptions of character strengths in Chinese  
25  
26 women with breast cancer. Semi-structured individual interviews were conducted.  
27  
28 The Standards for Reporting Qualitative Research (SRQR) were followed [27].  
29  
30  
31

32  
33 The researchers used a maximum variation sampling method and purposive  
34  
35 sampling technique to recruit participants to richly or densely describe the culture or  
36  
37 phenomenon of interest [28]. Regarding the sample size, the recruitment of  
38  
39 interviewees stopped when the data reached a saturation point, indicating that the  
40  
41 phenomenon could be understood comprehensively without further recruitment. Data  
42  
43 saturation was achieved through repetition and confirmation of the information  
44  
45 obtained by participants [29].  
46  
47  
48  
49

50  
51 The inclusion criteria were as follows: the patients were (a) women with a  
52  
53 confirmed diagnosis of breast cancer; (b) aged above 18 years old; (c) native Chinese;  
54  
55 (d) willing to participate in the study and offer informed consent. The exclusion  
56  
57 criteria were as follows: the patient suffered from (a) one or more other life-  
58  
59  
60

1  
2  
3  
4 threatening diseases, or (b) psychosis (for example, delusional disorder,  
5  
6 schizophrenia).

### 11 **Patient and public involvement**

12  
13  
14 Patients and/or the public were not involved in the design, conduct, reporting or  
15  
16 dissemination plans of this research.

### 22 **Data collection**

23  
24 We used semi-structured interviews to foster interactivity and dialogue [30].  
25  
26  
27 The instruments used in this study included a demographic data sheet and a semi-  
28  
29 structured interview guide. The demographic data sheet was devised to obtain  
30  
31 information on the patient's age, marital status, educational level and types of breast  
32  
33 cancer treatment. The interview guide was informed by the positive psychology  
34  
35 model of character strengths and the previous literature. The interviews opened with a  
36  
37 short introduction to the topic (e.g., a definition and explanation of 'character  
38  
39 strengths'). Each interview included eight questions designed to encourage discussion  
40  
41 on perceptions and beliefs about character strengths (Table 1). Pilot interviews were  
42  
43 conducted with three breast cancer patients to check the appropriateness of the  
44  
45 interview process and the accessibility of the questions. The demographic data sheet  
46  
47 took approximately five minutes to complete, and the whole interview took  
48  
49  
50  
51  
52  
53  
54  
55  
56 approximately 30 to 60 minutes.  
57  
58  
59  
60

Participant recruitment and interviews were conducted in November and December 2019 in two provincial tertiary hospitals in mainland China. To ensure consistency, the same researcher conducted all of the interviews [31]. The participants were asked for reflections and conclusions to prevent misunderstandings or omissions. Data collection was performed using audiotape recording, supplemented with handwritten notes on non-verbal behaviours and impressions.

**Table 1** Semi-structured interview guide used in this study

- 
1. From your perspective, what is your perception of character strengths?
  2. Can you share your experiences on your character strengths?
  3. Why did you use your character strengths?
  4. When you used your character strengths, were you more broadly interested in better understanding of yourself?
  5. What did you hope to achieve by your character strengths?
  6. What benefits did you expect to receive as a result of using your character strengths?
  7. In your opinion, what are the most important benefits or outcomes that have resulted from your character strengths?
  8. When you used your character strengths, were you looking for a solution to a specific problem or difficult situation?
  9. In what way(s) have your character strengths affected your daily life?
  10. In what way(s) have your character strengths help you met your expectations and/or needs?
- 

## Data Analysis

Directed content analysis and framework analysis were used to analyse the data in an combination of inductive and deductive approaches [32]. The analysis took place in five stages: (1) Stage 1, Familiarisation: Immersion in the data by repeatedly reading transcriptions and making field notes; (2) Stage 2, Analytical framework development: Preparing key topics, identifying important themes and developing the

1  
2  
3  
4 thematic framework, (3) Stage 3, Indexing: Completing data structuring and pilot  
5  
6 charting, refining and combining themes and sub-themes, (4) Stage 4, Charting:  
7  
8 Drawing summary chart and transferring data into the framework matrix, and (5)  
9  
10 Stage 5, Data mapping and interpreting: Comparing the analysis results to the original  
11  
12 data and explaining the relationship between codes, subthemes and themes [33]. The  
13  
14 VIA classification was used as the guiding framework for direct content analysis. This  
15  
16 framework is described in Table 2. The findings were presented in a synthesised form  
17  
18 of themes (virtues) and sub-themes (character strengths). No particular data software  
19  
20 was used for coding or organisational purposes. We not only sought to establish a  
21  
22 critical and common sense understanding of the text, but also to analyse it beyond  
23  
24 personal experience. We also looked for embedded character strengths in the content.  
25  
26 The themes and sub-themes were collected in a Microsoft Excel spreadsheet, with  
27  
28 supporting descriptions and quotes. Demographic data were analysed using SPSS  
29  
30 version 22.0 (SPSS, Inc., Chicago, IL) and descriptive statistics were obtained  
31  
32 (frequencies, means, standard deviations and percentages).  
33  
34  
35  
36  
37  
38  
39  
40  
41  
42  
43  
44

45 **Table 2** The Values in Action classification of virtues and character strengths

| Virtues                                                                                          | Character strengths        | Multiple descriptions, pronouns, and manifestations                                                                              |
|--------------------------------------------------------------------------------------------------|----------------------------|----------------------------------------------------------------------------------------------------------------------------------|
| 1. Wisdom & Knowledge<br><i>Cognitive strengths related to attaining and using new knowledge</i> | Creativity                 | [originality, ingenuity, discovering new and innovative ways to do things, thinking of novel and productive ways to do things]   |
|                                                                                                  | Curiosity                  | [openness to experience, taking an interest in all of ongoing experience, enthusiastically exploring and discovering new things] |
|                                                                                                  | Judgment & Open-Mindedness | [critical thinking, thinking things through and examining them from all sides]                                                   |

|                                                                                                                  |                                       |                                                                                                                                                                  |
|------------------------------------------------------------------------------------------------------------------|---------------------------------------|------------------------------------------------------------------------------------------------------------------------------------------------------------------|
|                                                                                                                  | Love of Learning                      | [Relishing in the acquisition of new skills and knowledge, mastering new skills, topics, and bodies of knowledge]                                                |
|                                                                                                                  | Perspective                           | [wisdom, providing wise counsel to others]                                                                                                                       |
| 2. Courage<br><i>Emotional strengths that involve working hard to accomplish goals in the face of opposition</i> | Bravery                               | [valor, not withdrawing or shrinking from threat, challenge, difficulty, or pain]                                                                                |
|                                                                                                                  | Perseverance                          | [persistence, finishing what one starts, industriousness, working hard to finish what is started]                                                                |
|                                                                                                                  | Honesty                               | [authenticity, integrity, speaking the truth and presenting oneself in a genuine and authentic way]                                                              |
|                                                                                                                  | Zest                                  | [vitality, enthusiasm, vigor, energy, Approaching life with excitement and energy]                                                                               |
| 3. Humanity<br><i>Interpersonal strengths that involve developing relationships and caring for other people</i>  | Capacity to Love and Be Loved         | [Valuing close relations with others]                                                                                                                            |
|                                                                                                                  | Kindness                              | [generosity, doing favors, nurturance, care, compassion, altruistic love, being generous and doing good deeds]                                                   |
|                                                                                                                  | Social Intelligence                   | [emotional intelligence, personal intelligence, being aware of the motives and feelings of self and others, knowing how to adapt to different social situations] |
| 4. Justice<br><i>Civic strengths related to be an integral part of a healthy community</i>                       | Teamwork                              | [citizenship, social responsibility, loyalty, Working collaboratively and well as member of a team or a group]                                                   |
|                                                                                                                  | Fairness                              | [Treating all people the same according to notions of fairness and justice and with impartiality]                                                                |
|                                                                                                                  | Leadership                            | [Effectively managing groups to complete activities, organizing group activities and seeing that they happen]                                                    |
| 5. Temperance<br><i>Strengths related to the use of restraint in thoughts, emotions, and behavior</i>            | Forgiveness & Mercy                   | [Forgiving those who have done wrong]                                                                                                                            |
|                                                                                                                  | Modesty & Humility                    | [Being modest and letting one's accomplishments speak for themselves]                                                                                            |
|                                                                                                                  | Prudence                              | [Being cautious about one's actions or choices; not saying or doing things that might later be regretted]                                                        |
|                                                                                                                  | Self-Regulation                       | [Regulating what one feels and does, self-control, Exercising self-control and discipline]                                                                       |
| 6. Transcendence<br><i>Strengths that provide meaning in life and exceed the limits of ordinary experience</i>   | Appreciation of Beauty and Excellence | [awe, wonder, elevation, Noticing and admiring beauty and excellence, and/or skilled performance in all domains of everyday life]                                |
|                                                                                                                  | Gratitude                             | [Being aware of and thankful for the good things that happen]                                                                                                    |
|                                                                                                                  | Hope                                  | [optimism, future-mindedness, future orientation, Expecting the best in the future, and working actively to achieve it]                                          |

|                              |                                                                                                                                      |
|------------------------------|--------------------------------------------------------------------------------------------------------------------------------------|
| Humor                        | [playfulness, enjoying laughter and amusing others, liking to laugh and joke, bringing smiles to other people]                       |
| Religiousness & Spirituality | [faith, purpose, having beliefs about life that bring comfort, having coherent beliefs about the higher purpose and meaning of life] |

Note. Terms in brackets are variants of the Character strength adapted from Peterson and Seligman (2004).

## Trustworthiness

To increase the credibility of our findings, we used a peer checking process.

Discussion continued until a consensus was reached among the co-researchers [34].

Open dialogue and careful probing were used during the interviews to ensure that the information was reliable. To enhance transferability [35], we continued interviews until data saturation occurred, made clear and distinct descriptions of the content and presented rich information from the findings.

## Ethics

All procedures were in accordance with the guidelines of the Research Ethics Committee of the University (CUHK Approval number: SBREC 19-114) and Joint Chinese University of Hong Kong–New Territories East Cluster Clinical Research Ethics Committee, reference number: 2019.429. A digital code was used to refer to each participant to maintain anonymity.

## Results

### Clinical and demographic characteristics

A total of 24 female breast cancer patients participated in the interviews. The average age of the participants was 52.54 years (range, 30–70 years). Table 3 outlines the participants' characteristics. Most of the participants had stage I/II breast cancer (66.7%), and the remainder (33.3%) had stage III/IV breast cancer. Seventeen participants (70.8%) had breast cancer in the left breast, five (20.8%) had cancer in the right breast and two (8.3%) had bilateral breast cancer.

**Table 3** Demographic information and clinical data of the participants (N = 24)

| Characteristics          | Number            | (%)  |
|--------------------------|-------------------|------|
| Age (years)              |                   |      |
| Mean $\pm$ SD            | 52.54 $\pm$ 11.56 |      |
| Range                    | 30-70             |      |
| Age <60                  | 15                | 62.5 |
| Age $\geq$ 60            | 9                 | 37.5 |
| Marital status           |                   |      |
| Married                  | 21                | 87.5 |
| Unmarried or widow       | 3                 | 12.5 |
| Occupation               |                   |      |
| Employed                 | 17                | 70.8 |
| Unemployed               | 7                 | 29.2 |
| Education states         |                   |      |
| Primary school and below | 10                | 41.7 |
| Junior school            | 4                 | 16.7 |
| Senior high school       | 7                 | 29.2 |
| Bachelor and above       | 3                 | 12.5 |
| Perceived Income         |                   |      |
| Low                      | 3                 | 12.5 |
| Middle                   | 9                 | 37.5 |
| Good                     | 7                 | 29.2 |
| High                     | 5                 | 20.8 |
| Type of cancer           |                   |      |
| Breast cancer            | 24                |      |
| Left                     | 17                | 70.8 |
| Right                    | 5                 | 20.8 |
| Two sides                | 2                 | 8.3  |



|    |                                    |      |      |
|----|------------------------------------|------|------|
| 1  |                                    |      |      |
| 2  |                                    |      |      |
| 3  | Stage of disease                   |      |      |
| 4  | I/II                               | 16   | 66.7 |
| 5  | III/IV                             | 8    | 33.3 |
| 6  |                                    |      |      |
| 7  | Time since diagnosis (months)      |      |      |
| 8  | Mean                               | 8.63 |      |
| 9  |                                    |      |      |
| 10 | Adjuvant therapy                   |      |      |
| 11 | Only had surgery                   | 10   | 41.7 |
| 12 | Also had chemotherapy or radiation | 14   | 58.3 |
| 13 | therapy                            |      |      |
| 14 |                                    |      |      |

15 *Note. Because of rounding, percentages may not total 100.*

### 21 **Character strengths identified within the VIA framework**

22  
 23  
 24 The participants' main character strengths were consistent with the VIA  
 25  
 26 classification; they included cognitive strengths, emotional strengths, civic and  
 27  
 28 community strengths, interpersonal strengths, temperance strengths and transcendence  
 29  
 30 strengths. Table 4 summarises the character strengths of the breast cancer patients.  
 31  
 32 The original 24 strengths were identified in the findings, and two new strengths of  
 33  
 34 selflessness and pragmatism emerged in our study. The themes (virtues) and sub-  
 35  
 36 themes (strengths) are illustrated by sample quotes from the participants (Table 5).  
 37  
 38 The participants also gave their perceptions and comments on the outcomes and  
 39  
 40 expectations of identifying and using individual character strengths. In general, the  
 41  
 42 participants expressed improved self-awareness and a greater sense of purpose and  
 43  
 44 well-being.  
 45  
 46  
 47  
 48  
 49  
 50  
 51  
 52  
 53  
 54  
 55  
 56  
 57  
 58  
 59  
 60

**Table 4** Adapted from values in action classifications of character strengths

| <b>Virtues</b>                      | <b>Character strengths</b>      | <b>Cultural adapted descriptions, pronouns, and manifestations</b>                                                                                                                                                                 |
|-------------------------------------|---------------------------------|------------------------------------------------------------------------------------------------------------------------------------------------------------------------------------------------------------------------------------|
| Cognitive strengths                 | Creativity                      | Ingenuity, doing things in innovative ways, thinking in innovative and unique ways; seeing things in different ways                                                                                                                |
|                                     | Curiosity                       | Interested in all experiences; motivated to discover and explore new things; want to learn about unknown objects, environments or experiences of others                                                                            |
|                                     | Judgment & Open-Mindedness      | The ability to think, understand, analyze, discern or judge rationally, independently and comprehensively; thinking carefully; defensive thinking                                                                                  |
|                                     | Love of Learning                | Studious, be eager to learn, erudite, philomathic; mastering new skills; enjoy new knowledge, enjoy learning                                                                                                                       |
|                                     | Perspective                     | Resourceful, wise, good at planning and handling things; excellent insight and vision, farsighted                                                                                                                                  |
| Emotional strengths                 | Bravery                         | Fearless, courageous, heroic, resolute, brave and bold; not timid, not afraid of danger or difficulty, not shrinking back.                                                                                                         |
|                                     | Perseverance                    | Persevere to the end, no slackness, still persevere after repeated failures; hardworking, not give up halfway; diligent, industrious                                                                                               |
|                                     | Honesty                         | True, honest; integrity, sincere and earnest, wholeheartedly; being true to oneself and others                                                                                                                                     |
|                                     | Zest                            | Enthusiastic about things or others; vigorous vitality; vividness in action, thought or expression, energetic                                                                                                                      |
|                                     | Capacity to Love and be Loved   | Valuing close relations with others; give love to others, be loved by others; feel the warmth, happiness, satisfaction and beauty in love, friendship, family affection, fraternity and other deep emotions for people and things. |
| Interpersonal strengths             | Kindness                        | Benevolent, kind-hearted; generosity, nurturance, charitable; serving others without expectation                                                                                                                                   |
|                                     | Social Intelligence             | Emotional intelligence, aware of the motives and feelings of oneself and others; knowing how to get along can make others comfortable                                                                                              |
|                                     | Teamwork                        | Working collaboratively and well as member of a team or a group, unite and work together to get better results; loyalty to team or group and working well with others                                                              |
|                                     | Fairness                        | Righteousness, uprightness; not afraid of the strong, not bullying the weak, stick to the right way; Treat everyone the same according to justice                                                                                  |
|                                     | Leadership                      | Confucian leadership; influence others, improve the efficiency of the entire group and ensuring team harmony                                                                                                                       |
| Civic and community strengths       | <b>Selflessness<sup>a</sup></b> | Dedication, not self-interested; proud to serve the collective people and ashamed to deviate from the people, proud of unity and mutual assistance, ashamed of self-interest; devotion to family and country.                      |
|                                     | Forgiveness & Mercy             | Forgive, ignore the faults of others; tolerant, considerate; not to care about wrongdoing or to hold accountable; compassion                                                                                                       |
|                                     | Modesty & Humility              | Modest, polite, humble; reserved, courteous, not exaggerating one's ability or value; no boasting or                                                                                                                               |
| Restrained and temperance strengths |                                 |                                                                                                                                                                                                                                    |

|                         |                                       |                                                                                                                                                                                              |
|-------------------------|---------------------------------------|----------------------------------------------------------------------------------------------------------------------------------------------------------------------------------------------|
|                         |                                       | arrogance, not complacent; willing to accept criticism, and humbly ask people for advice.                                                                                                    |
|                         | Prudence                              | Be cautious about actions or choices; solemnly, careful; dependable, stable, calm and not anxious in situations                                                                              |
|                         | Self-Regulation                       | Self-control; disciplined, restraint; managing personal impulses, emotions, laziness and other bad habits                                                                                    |
|                         | <b>Pragmatism <sup>a</sup></b>        | Believe practice leads to true knowledge and wealth, believe actions speak louder than words, try to be practical, realistic, committed to the reality                                       |
| Transcendence strengths | Appreciation of Beauty and Excellence | Appreciate, awe, fascinate and admire the beauty and excellence, and/or all outstanding skills, treasures or people                                                                          |
|                         | Gratitude                             | Being aware of and thankful for the good things that happened, grateful, moved by the virtues of others, grateful for the kindness and favors of others, and seek ways to return             |
|                         | Hope                                  | Optimism, positive future mindedness, full of confidence in what is going on, open-minded and have good wishes for the future                                                                |
|                         | Humor                                 | Funny, humorous, playfulness and enjoy talking witty, bring laughter and amusement to others                                                                                                 |
|                         | Religiousness & Spirituality          | Faith, believe in religion, unwavering belief, a state of mind that has trust or trust in someone or something, extremely convinced of a certain thought, doctrine, and as a personal belief |

<sup>a</sup> Newly emerged themes in the current study

**Table 5** Examples from the participants in character strengths, with their anonymous code number and age

| Character strengths        | Quotes                                                                                                                                                                                                                                                                                                          |
|----------------------------|-----------------------------------------------------------------------------------------------------------------------------------------------------------------------------------------------------------------------------------------------------------------------------------------------------------------|
| Creativity                 | I feel that I always think differently from others of my age. The way I look at things is different. I usually make some fresh and unique gadgets for the children at home (Participant 14, 45).                                                                                                                |
| Curiosity                  | I'm interested in hearing gossip about what's going on between my neighbours and where my relatives have travelled, or finding out what grocery they recommend and where supermarkets are offering cheaper discounts. I'm interested in all these experiences and things, sort of curious (Participant 22, 53). |
| Judgment & Open-Mindedness | I think I'm older, but much wiser than when I was younger. I've been through a lot of things and I'm not so attached and concerned about everything. Nowadays, when things come up again, I think very rationally and calmly about what to do, unlike the young people who are so whiny (Participant 17, 47).   |
| Love of Learning           | I usually learn a new thing, that is, learn to dance the popular square dance to divert my attention. Recently I learnt to play new cellphone apps like Douyin and Kuaishou with my friends. I feel that I do not have time to be unhappy when learning new things (Participant 1, 48).                         |
| Perspective                | My personality is very good, just love to study and love to work. I usually use two mobile phones to study, and all the recordings on the other mobile phone (Participant 11, 30).                                                                                                                              |
| Bravery                    | I think life is only a few decades, like a white horse passing a gap. Sooner or later, it is the same thing. The key is that you must think about it and look down on everything. This is the wisdom of survival (Participant 3, 54).                                                                           |
|                            | I think I dare to face these things myself. But my body is my own business, I must be brave (Participant 3, 54).                                                                                                                                                                                                |

|    |               |                                                                                                                                                                               |
|----|---------------|-------------------------------------------------------------------------------------------------------------------------------------------------------------------------------|
| 1  |               |                                                                                                                                                                               |
| 2  |               |                                                                                                                                                                               |
| 3  | Perseverance  | My husband can feel that I am strong and persistent. Compared with others, the advantages my character brings is I can be a bit stronger against stress. (Participant 2, 67). |
| 4  |               |                                                                                                                                                                               |
| 5  |               |                                                                                                                                                                               |
| 6  |               | I worked very hard in my work unit before, just want to get a promotion next year.                                                                                            |
| 7  |               | Unexpectedly, this illness disrupted the plan (Participant 4, 32).                                                                                                            |
| 8  | Honesty       | I am an ordinary person, I'm just straight hearted, and then I just say what I think, that is, I am honest and sincere (Participant 1, 48).                                   |
| 9  |               |                                                                                                                                                                               |
| 10 | Zest          | Because I am passionate about making friends in the square dance group, now I am sick and many partners come to see me. I was encouraged when they came (Participant 10, 52). |
| 11 |               |                                                                                                                                                                               |
| 12 |               |                                                                                                                                                                               |
| 13 | Capacity to   | I am filial to my parents-in-law and be a good daughter-in-law. After being sick, I am                                                                                        |
| 14 | Love and be   | very happy and feel beloved to be taken care of after a long time. I feel that my                                                                                             |
| 15 | Loved         | families support me and love me (Participant 1, 48).                                                                                                                          |
| 16 | Kindness      | Then I never did anything bad. Then I felt like I was very nice. I was just being kind to                                                                                     |
| 17 |               | others. Repay grievances with virtue and be compassionate (Participant 1, 48).                                                                                                |
| 18 |               | I believe benevolent must be rewarded with kindness. I've always been a good person                                                                                           |
| 19 |               | (Participant 3, 54).                                                                                                                                                          |
| 20 | Social        | Every time my family came, I said I was fine and did not want them to worry                                                                                                   |
| 21 | Intelligence  | (Participant 9, 65).                                                                                                                                                          |
| 22 | Teamwork      | Three cobblers with their wits combined, equal Zhuge Liang the master mind-                                                                                                   |
| 23 |               | collective wisdom often proves superior (two heads are better than one) (Participant 4,                                                                                       |
| 24 |               | 32).                                                                                                                                                                          |
| 25 |               | I used to work, and I can have a good relationship with my colleagues and                                                                                                     |
| 26 |               | subordinates (Participant 11, 30).                                                                                                                                            |
| 27 | Fairness      | Any conflicts between them can be handled fairly no matter what I say. I got this                                                                                             |
| 28 |               | disease and I cannot do anything now (Participant 11, 30).                                                                                                                    |
| 29 | Leadership    | I was also a small head in the unit before, and how to allocate jobs to everyone                                                                                              |
| 30 |               | harmoniously is also a skill, and it can improve the efficiency of the entire department                                                                                      |
| 31 |               | (Participant 12, 35).                                                                                                                                                         |
| 32 |               | I have made it to the position of department manager in my organisation and would not                                                                                         |
| 33 |               | have missed work had I not been ill. I had to get my people's affairs in order before I                                                                                       |
| 34 |               | was admitted to hospital (Participant 24, 37).                                                                                                                                |
| 35 |               | I feel that I am selfless. I have sacrificed my whole life, sacrificed for my family, and                                                                                     |
| 36 |               | cooperated with national policies. I feel that our generation pays more attention to the                                                                                      |
| 37 |               | collective and puts everyone's interests ahead of their own. This is also written in the                                                                                      |
| 38 | Selflessness  | Eight Honors and Eight Shames (Participant 13, 60).                                                                                                                           |
| 39 |               | It is proud to serve the collective people and ashamed to deviate from the people. We                                                                                         |
| 40 |               | are proud of unity and mutual assistance, and ashamed of self-interest (Participant 16,                                                                                       |
| 41 |               | 56).                                                                                                                                                                          |
| 42 | Forgiveness & | Well, I think everyone is good, but many patients are now demanding and dissatisfied                                                                                          |
| 43 | Mercy         | with the people around them. Sometimes they lose their temper at the small mistakes                                                                                           |
| 44 |               | of doctors and nurses. It is better to be tolerant and forgive like me (Participant 11, 30).                                                                                  |
| 45 | Modesty &     | My family and patients still thought I was humble. I feel that my personality is simple,                                                                                      |
| 46 | Humility      | and I get along well with everyone (Participant 5, 52).                                                                                                                       |
| 47 | Prudence      | I take photographs of the bags of medication that I receive infusions of and the                                                                                              |
| 48 |               | medication that I take every day. I also keep the bill for each payment. I often talk to                                                                                      |
| 49 |               | my doctor about my condition and I think that being discreet will give me peace of                                                                                            |
| 50 |               | mind (Participant 23, 38).                                                                                                                                                    |
| 51 | Self-         | I felt that my self-discipline was meaningful, so I strengthened my exercise.                                                                                                 |
| 52 | Regulation    | (Participant 8, 55).                                                                                                                                                          |
| 53 | Pragmatism    | Practice brings real wealth, it speaks louder than words (Participant 3, 54).                                                                                                 |
| 54 |               | I am a pragmatic person, I don't know how to say nice things. I do not afraid and have                                                                                        |
| 55 |               | no time to feel depressed. I do not want to worry about it. I just want to eat and drink                                                                                      |
| 56 |               | and do my work. I do not want anything else (Participant 2, 67)                                                                                                               |
| 57 | Appreciation  | I was reading a novel about the philosophy of life recently. I will read this book after                                                                                      |
| 58 | of Beauty and | treatment. I feel comfortable appreciating these beautiful things. I also appreciate the                                                                                      |
| 59 | Excellence    | natural environment and feel better (Participant 12, 35).                                                                                                                     |
| 60 |               |                                                                                                                                                                               |

|    |                                             |                                                                                          |
|----|---------------------------------------------|------------------------------------------------------------------------------------------|
| 1  |                                             |                                                                                          |
| 2  |                                             |                                                                                          |
| 3  | <b>Gratitude</b>                            | Everyone, whether old or young, should know how to be grateful (Participant 1, 48).      |
| 4  |                                             | I think the nurses here have given me a lot of help, and the doctors respect my ideas    |
| 5  |                                             | and help me with treatment. I am very grateful to them. The services in the hospital are |
| 6  |                                             | very good, so I feel very good (Participant 3, 54).                                      |
| 7  |                                             | I feel that the doctors, nurses and family members are very concerned about me.          |
| 8  |                                             | Everyone has a very good attitude. It is not easy for everyone to work and live. I have  |
| 9  |                                             | a lot of spiritual support. I am very grateful (Participant 11, 30).                     |
| 10 | <b>Hope</b>                                 | My family is pampering me now, which is pretty good. My husband said that I have         |
| 11 |                                             | been optimistic in the past years. Well, I just want to be stronger anyway, everything   |
| 12 |                                             | will definitely get better (Participant 2, 67).                                          |
| 13 | <b>Humor</b>                                | But sometimes when I chat with patients in the department, no matter what I say,         |
| 14 |                                             | everyone is very happy. It feels like I am everyone's pistachio. But I think I am more   |
| 15 |                                             | cute than humorous (Participant 5, 52).                                                  |
| 16 | <b>Religiousness<br/>&amp; Spirituality</b> | Just to get better soon, and live a few more years, I have been chanting and believing   |
| 17 |                                             | in Buddha. My child also said that I had changed but felt that my mentality was much     |
| 18 |                                             | better and calmer after relying on faith and religion (Participant 7, 65).               |
| 19 |                                             |                                                                                          |

### Theme 1: Cognitive strengths

Cognitive strengths reflect wisdom, knowledge, exploration, openness and knowledge-seeking [12]. This theme involves five strengths: creativity, curiosity, judgment and open-mindedness, love of learning, and perspective. These subthemes reflect the manifestations of cognitive strengths based on wisdom, openness and knowledge. In response to unexpected situations or unfamiliar problems, the participants usually gave wise solutions. Some participants aided their recovery by reading about treatment and nursing skills, which also demonstrated their love of learning. Love of learning refers to cognitive engagement, mastering new skills and increasing existing knowledge [36]. Creativity refers to original and adaptive thought or behaviour. The narratives of the participants also reflected how they found new ways to deal with the familial and social problems encountered while receiving treatment.

### Theme 2: Emotional strengths

1  
2  
3  
4 When the participants talked about their lives after breast cancer and the  
5  
6 inherent difficulties they faced, they also showed the emotional strengths of courage,  
7  
8 perseverance, honesty and enthusiasm. This theme involves four strengths: bravery,  
9  
10 perseverance, honesty and zest. These subthemes reflect the Chinese manifestations of  
11  
12 emotional strengths. Being brave means not shrinking from challenges [37]. For  
13  
14 example, some participants said that they dared to face physical damage after breast  
15  
16 surgery and hair loss after chemotherapy. They felt that living was more important  
17  
18 than these considerations. Bravery enabled self-determination and helped them  
19  
20 actively persevere. Other participants said frankly that they told their family members  
21  
22 about their fear of death, while emphasising that their family members remained  
23  
24 encouraging and supportive.  
25  
26  
27  
28  
29  
30  
31  
32  
33  
34

### 35 **Theme 3: Interpersonal strengths**

36  
37 Interpersonal strengths clearly reflect humanity and justice. They include love,  
38  
39 kindness, social intelligence and developing relationships and caring for other people.  
40  
41 This theme involves three strengths: capacity to love and be loved, kindness and  
42  
43 social intelligence. Social intelligence is the awareness of the motives and feelings of  
44  
45 oneself and others, and knowing how to adapt to different social situations [37]. This  
46  
47 was demonstrated by many participants, especially patients who got along well with  
48  
49 roommates and nurses during hospitalisation.  
50  
51  
52  
53  
54  
55  
56  
57

### 58 **Theme 4: Civic and community strengths**

59  
60

1  
2  
3  
4 Civic strengths are considered an integral part of a healthy community; they  
5  
6 include teamwork, fairness and leadership. In our study, we also identified a fourth  
7  
8 civic strength: selflessness. Teamwork refers to social responsibility and working  
9  
10 collaboratively as a member of a team or group. Fairness involves treating people the  
11  
12 same according to principles of justice. Selflessness refers to dedication, rather than  
13  
14 self-interest. This is a distinct cultural strength proposed by the Chinese participants  
15  
16 in the study. Participants thought this was one of their strengths, which helped them  
17  
18 obtain the respect of others and society.  
19  
20  
21  
22  
23  
24  
25  
26

### 27 **Theme 5: Restraint and temperance strengths**

28  
29  
30 Restraint and temperance strengths encompass forgiveness, modesty, prudence  
31  
32 and self-regulation. In our study, this theme also contains a fifth strength: pragmatism.  
33  
34 Modesty means an unwillingness to praise oneself and show off one's qualities or  
35  
36 achievements [2,37]. In all of our interviews, when we first mentioned expressing  
37  
38 personal strengths, the participants often avoided talking and reflected that humility is  
39  
40 a common occurrence. The participants were reluctant to talk about their own  
41  
42 achievements and character strengths. They thought that talking about this would  
43  
44 violate their culture's respect for humility, and they were embarrassed. In contrast,  
45  
46 they were more willing to admit that they had many shortcomings. Chinese Confucian  
47  
48 view has evolved into the view that humility makes people grow, while complacency  
49  
50 and pride make people degenerate [38]. Pragmatism is related to facts or practical  
51  
52 matters, and usually excludes intellectual or artistic matters. Pragmatism is a new  
53  
54  
55  
56  
57  
58  
59  
60



1  
2  
3  
4 emergent subtheme, which means practicality rather than idealism. This is another  
5  
6 distinctly Chinese strength that may be related to China's long period of construction  
7  
8 and development.  
9  
10

### 11 12 13 14 **Theme 6: Transcendence strengths**

15  
16  
17 Transcendence strengths provide meaning in life and exceed the limits of  
18  
19 ordinary experience. This theme contains five strengths: appreciation of beauty and  
20  
21 excellence, gratitude, hope, humour, and religiousness and spirituality. Although the  
22  
23 participants mentioned that their spirituality was related to Buddhism, it was more  
24  
25 about how they gained strength from their belief system and cultural values. These  
26  
27 strengths gave the participants guidelines, made them feel special, and enabled them  
28  
29 to cope with the negative things in their life and treatment. Gratitude and spirituality  
30  
31 were common strengths across all of the interviews. The participants mentioned that  
32  
33 they tended to gain comfort from these strengths after their diagnosis, despite their  
34  
35 physical weakness and psychological dysfunction.  
36  
37  
38  
39  
40  
41  
42  
43  
44  
45

### 46 **Positive outcomes and expectations of identifying and using character strengths**

47  
48 Several subjective positive outcomes were frequently addressed by the  
49  
50 participants in connection with the awareness of strengths. They included improved  
51  
52 self-awareness, personal confidence and self-esteem, increased happiness, optimism, a  
53  
54 greater sense of meaning in life, improved well-being and decreased distress. Better  
55  
56 well-being and a sense of meaning were the most frequently addressed benefits  
57  
58  
59  
60



1  
2  
3  
4 (mentioned eleven times). In addition, in reference to these outcomes, most of the  
5  
6 related strengths were those that involved reconnecting with people, such as gratitude,  
7  
8 kindness, selflessness and love. The most frequently quoted proverb was ‘good people  
9  
10 get rewards’ (mentioned eight times); that is, they felt that if they did good deeds for  
11  
12 others, their health and life would improve.  
13  
14  
15  
16  
17  
18

## 19 **Discussion**

20  
21  
22 The patients with breast cancer in this study described a large repertoire of  
23  
24 character strengths they used or wished for during survivorship. In line with previous  
25  
26 studies [2], most of the themes and sub-themes coded in this study were in line with  
27  
28 VIA. Two more strengths — selflessness and pragmatism — emerged. Cultural  
29  
30 values and culture (e.g., collectivism, importance of family, Confucianism and  
31  
32 Buddhism) helped structure the participants strengths and influenced their  
33  
34 descriptions.  
35  
36  
37  
38  
39

40  
41 Throughout the research process, the participants had difficulty identifying  
42  
43 and talking about their strengths. This may demonstrate their strength of modesty.  
44  
45 Such humbleness could be influenced by Chinese Confucian culture [39]. Other  
46  
47 studies have also identified this barrier to the expression of strengths [2]. The  
48  
49 challenges encountered by our participants in transforming their strengths into  
50  
51 descriptive language may reflect their need for more opportunities for self-awareness  
52  
53 and self-reflection. Another possible explanation is the conceptual overlap between  
54  
55 strengths and cultural values. This overlap may lead people to underestimate their  
56  
57  
58  
59  
60

1  
2  
3  
4 capabilities [40] and their interpersonal and cognitive strengths. The participants also  
5  
6 highlighted that they wanted their character strengths to be more noticed, appreciated  
7  
8 and encouraged by others, such as family members and medical caregivers. Chinese  
9  
10 culture emphasises the role of the family. The affairs of family members are usually  
11  
12 determined by the entire family [41]. In such a collectivist environment, individual  
13  
14 character is often not valued. Interaction with physicians and nurses was also  
15  
16 highlighted. The women's high respect for physicians and reliance on nurses led them  
17  
18 to attach great importance to communication. The awareness and praise of personal  
19  
20 character strengths by family members and medical caregivers enhanced their sense  
21  
22 of self-esteem and well-being while living with breast cancer. One previous study  
23  
24 similarly demonstrated that overcoming blindness to strengths could improve an  
25  
26 individual's self-efficacy and self-confidence, which in turn could affect their well-  
27  
28 being [42].  
29  
30  
31  
32  
33  
34  
35  
36  
37

38 In our study, the participants with breast cancer did not differ from the healthy  
39  
40 individuals studied in the previous literature in terms of transcendence strengths  
41  
42 (appreciation of beauty and excellence, religiousness, spirituality) and cognitive  
43  
44 strengths (wisdom and knowledge). These are potential characteristics of breast  
45  
46 cancer patients that they can use when experiencing life and treatment events. These  
47  
48 results are reflected in traditional palliative care or existing psychosocial programmes  
49  
50 for breast cancer patients, in which patients are taught to express appropriate emotion  
51  
52 and improve their problem-solving skills as part of the recovery process [43]. The  
53  
54 breast cancer patients in this study experienced a similar appreciation of beauty. They  
55  
56  
57  
58  
59  
60

1  
2  
3  
4 appreciated excellence in all areas of life (art, nature and daily life) and in other  
5  
6 people. They had coherent beliefs about truth and life independent of their disease and  
7  
8 treatment.  
9

10  
11 The experiences of emotional strengths, interpersonal strengths, civic and  
12  
13 community strengths, restrained and temperance strengths, and other types of strength  
14  
15 are significantly influenced by breast cancer and cultural values. Kindness and  
16  
17 gratitude are associated with positive affect [37], and were the character strengths  
18  
19 most frequently expressed by the participants. Studies have consistently shown that  
20  
21 strengths of the heart, such as kindness and gratitude, are more strongly associated  
22  
23 with well-being than individual strengths, such as creativity and leadership. The other  
24  
25 character strengths most frequently mentioned by the participants were love,  
26  
27 selflessness, honesty, modesty and hope. This coincides with the perception of  
28  
29 character in Chinese culture. Chinese people have inherited the Confucian emphasis  
30  
31 on the cultivation of good character traits, like benevolence and kindness [39].  
32  
33 Kindness and fairness are the important characteristics in the traditional culture of  
34  
35 benevolence and righteousness. Some of the participants emphasised that their belief  
36  
37 in Buddhism and religious practice made them feel much calmer during their breast  
38  
39 cancer episode, and they felt that their spirit and beliefs gave them hope and gave life  
40  
41 new meaning. This finding also suggests that spirituality/religiousness is related to  
42  
43 meaning and goals in life [44].  
44  
45  
46  
47  
48  
49  
50  
51  
52  
53  
54

55  
56 Concepts also need to be understood within the prevailing sociocultural and  
57  
58 political context [45]. The two newly emerging strengths are influenced by  
59  
60

1  
2  
3  
4 contemporary culture and policies. Selflessness refers to the characteristic Chinese  
5  
6 concept that people should not be self-interested, be proud to serve the collective and  
7  
8 ashamed to deviate from it, and strive for unity. Pragmatism emphasises beliefs that  
9  
10 practice will lead to true knowledge and wealth; it has been strengthened by modern  
11  
12 development policies.  
13  
14  
15

### 16 17 18 19 **Theoretical considerations and implications**

20  
21  
22 Although there are other current theories and frameworks based on strengths,  
23  
24 they have a number of limitations; in contrast, VIA has achieved a wide range of  
25  
26 applications. Roux, Dingley and Bush (2002) introduced the theory of inner strength  
27  
28 and Lundman et al. (2010) offered a conceptual model of four core dimensions  
29  
30 [45,46]. However, most related studies have been carried out on women. Expressions  
31  
32 of inner strength at different ages and in different life circumstances take different  
33  
34 forms [45]. Janssen, Van Regenmortel, and Abma (2011) identified sources of  
35  
36 strength in three domains, individual, interactional and contextual, but did not define  
37  
38 the strengths [47]. In a similar Chinese study, Duan and Ho (2017) used the VIA  
39  
40 theory of character strengths, but their three-dimensional model of strengths  
41  
42 (temperance, intellectual, and interpersonal) was generalised to the non-clinical  
43  
44 community [48].  
45  
46  
47  
48  
49  
50  
51

52  
53 Our findings among breast cancer patients support the theoretical  
54  
55 understanding of strengths [12]. Our study examined the viability of the popular VIA  
56  
57 theory among a specific population in the Chinese context. The findings also extend  
58  
59  
60

1  
2  
3  
4 the theoretical and empirical evidence for the VIA model to the population of patients  
5  
6 with breast cancer in China. This compatibility and integration of strengths theory and  
7  
8 traditional values may make the VIA more than a conceptual tool. Although the  
9  
10 original VIA classification framework applied to a range of religions, philosophies  
11  
12 and cultures, the situational themes of strengths could be expressed in different life  
13  
14 domains or specific contexts/situations [49]. In our study, the patients with breast  
15  
16 cancer were in a special context with various challenges. It is important to note that  
17  
18 the VIA is still being refined, so the list of strengths may change accordingly [50].  
19  
20 Therefore, further research is needed to test the VIA among breast cancer patients  
21  
22 with various characteristics.  
23  
24  
25  
26  
27  
28  
29  
30  
31

### 32 **Clinical implications**

33  
34  
35 It is important to emphasise the psychological strengths of breast cancer  
36  
37 patients and their abilities related to their personal traits in a kind of individual-  
38  
39 oriented salutogenic approach [36]. Strengths that are associated with positive  
40  
41 outcomes are those that link people together, such as gratitude, kindness, selflessness  
42  
43 and love. However, for nurses, psychological counsellors and other professionals,  
44  
45 further research is needed to optimise the description of strengths and evaluation for  
46  
47 patients in China.  
48  
49  
50  
51

52  
53 To our knowledge, this is the first study to describe Chinese breast cancer  
54  
55 patients' perceptions and experiences of character strengths. The findings indicate that  
56  
57 character strength is a crucial psychological resource during patients' survivorship.  
58  
59  
60

Further research is needed to learn more about the strengths of a larger population of breast cancer patients with different backgrounds. In addition, strength identification and knowledge are only prerequisites. Using strengths is what leads to valuable outcomes. It is also necessary to explore strategies and interventions to help breast cancer patients mobilise their personal strengths. Strength-based practices adapted to Chinese breast cancer patients should be developed in clinical programmes.

### **Study limitations**

Although we have provided some important findings on the strengths of breast cancer patients, this study has several limitations. First, the generalisability of the results is limited. The number of participants was small. The study hospital was a provincial hospital that admitted patients from central China. Second, the findings were based on the statements of the participants. Additional studies are needed to explore the generalisability of our findings. Another limitation may be the definition of character strengths. This study used the core descriptive elements provided by Peterson and Seligman (2004) [12]. Making use of a broader study of strengths could overcome this limitation, especially for those who are less familiar with character strengths and those who have difficulty in describing them. Replicating the study might increase its validity by allowing participants more time to become familiar with strengths and to speculate about expressions based on their individual experiences.

### **Conclusion**

1  
2  
3  
4 This study revealed the obstacles encountered by breast cancer patients in  
5  
6 describing their own strengths but proved that it is possible to uncover their character  
7  
8 strengths. An evidence base is needed to optimise breast cancer patients' awareness of  
9  
10 their strengths. Breast cancer patients' perceptions of character strengths are affected  
11  
12 by various issues related to personal experience with breast cancer and cultural  
13  
14 values. The participants in this study experienced better well-being and a greater  
15  
16 sense of purpose in life due to character strengths that reconnected people. This study  
17  
18 highlights the importance of cultural values to the construct of character strengths.  
19  
20 Finally, this study established a theoretically sound model for understanding and  
21  
22 addressing strengths in Chinese clinical breast cancer care with clear, culturally  
23  
24 specific descriptions.  
25  
26  
27  
28  
29  
30  
31  
32  
33  
34  
35  
36

37 **Acknowledgements** The authors are grateful to all the participants who generously  
38  
39 gave their time to take part in an interview for this study and shared their experiences.  
40  
41

42 **Contributors** YTT contributed to the conception and design, data collection by  
43  
44 conducting the interviews, analysis and interpretation, drafted and reviewed the  
45  
46 manuscript. CC contributed to the conception and design, interpretation and reviewed  
47  
48 the manuscript. PVB contributed to the analysis, interpretation and reviewed the  
49  
50 manuscript. CKM and LMZ contributed to the conception and design and reviewed  
51  
52 the manuscript. All authors have given final approval of the version to be published  
53  
54 and agree to be accountable for all aspects of the work in ensuring that questions  
55  
56 related to the accuracy or integrity of any part of the work are appropriately  
57  
58 investigated and resolved. YTT is responsible for the overall content as guarantor.  
59  
60

1  
2  
3  
4 **Funding** This research did not receive any specific grant from funding agencies in the  
5 public, commercial or not-for-profit sectors.  
6

7  
8 **Competing interests** The authors declare they have no conflict of interest.  
9

10 **Patient and public involvement** Patients and/or the public were not involved in  
11 the design, conduct, reporting or dissemination plans of this research.  
12  
13

14  
15 **Patient consent for publication** A digital code was used to refer to each participant  
16 to maintain anonymity. Patient consent for publication Consent obtained directly from  
17 patient(s).  
18  
19

20  
21 **Ethics approval** All procedures were in accordance with the guidelines of the  
22 Research Ethics Committee of the University (CUHK Approval number: SBREC 19-  
23 114) and Joint Chinese University of Hong Kong–New Territories East Cluster  
24 Clinical Research Ethics Committee, reference number: 2019.429. This study was in  
25 accordance with the ethical standards of the institutional research committee and with  
26 the 1964 Helsinki declaration and its later amendments.  
27  
28  
29

30  
31 **Provenance and peer review** Not commissioned; externally peer reviewed.  
32  
33

34  
35 **Data availability statement** Data are available on reasonable request.  
36  
37

38  
39 **Supplemental material** This content has been supplied by the author(s). It has not  
40 been vetted by BMJ Publishing Group Limited (BMJ) and may not have been peer-  
41 reviewed. Any opinions or recommendations discussed are solely those of the  
42 author(s) and are not endorsed by BMJ. BMJ disclaims all liability and responsibility  
43 arising from any reliance placed on the content. Where the content includes any  
44 translated material, BMJ does not warrant the accuracy and reliability of the  
45 translations (including but not limited to local regulations, clinical guidelines,  
46 terminology, drug names and drug dosages), and is not responsible for any error  
47 and/or omissions arising from translation and adaptation or otherwise.  
48  
49  
50  
51  
52  
53  
54  
55  
56  
57  
58  
59  
60



## References

- 1 Moyle W, Parker D, Bramble M. *Care of older adults. A strengths-based approach*. Sydney: : Cambridge University Press 2014.
- 2 Waterworth S, Raphael D, Gott M, *et al*. Uncovering strengths within community dwelling older adults: What does it mean for health care practice? *Heal Soc Care Community* 2019;:1–9. doi:10.1111/hsc.12924
- 3 Gottlieb LN, Gottlieb B. Strengths-Based Nursing: A Process for Implementing a Philosophy Into Practice. *J Fam Nurs* 2017;**23**:319–40. doi:10.1177/1074840717717731
- 4 Duan W, Bu H. Development and initial validation of a short three-dimensional inventory of character strengths. *Qual Life Res* 2017;**26**:2519–31. doi:10.1007/s11136-017-1579-4
- 5 Jeste D V., Palmer BW, Boardman S, *et al*. Integrating Positive Psychiatry Into Clinical Practice. In: *Positive Psychiatry*. 2015. doi:10.1176/appi.books.9781615370818.dj12
- 6 Park CL, Gaffey AE. Relationships between psychosocial factors and health behavior change in cancer survivors: An integrative review. *Ann Behav Med* 2007;**34**:115–34. doi:10.1007/BF02872667
- 7 Pieters HC. ‘i’m Still Here’: Resilience among older survivors of breast cancer. *Cancer Nurs* 2016;**39**:E20–8. doi:10.1097/NCC.0000000000000248

- 1  
2  
3  
4 8 Rotegard AK, Fagermoen MS, Ruland CM. Cancer patients' experiences of  
5  
6 their personal strengths through illness and recovery. *Cancer Nurs* 2012;**35**:8–  
7  
8 17. doi:10.1097/NCC.0b013e3182116497  
9  
10  
11 9 Niemiec R, Rashid T, Spinella M. Strong Mindfulness: Integrating Mindfulness  
12  
13 and Character Strengths. *J Ment Heal Couns* 2015;**34**:240–53.  
14  
15  
16 doi:10.17744/mehc.34.3.34p6328x2v204v21  
17  
18  
19 10 Fang SY, Lin YC, Chen TC, *et al.* Impact of marital coping on the relationship  
20  
21 between body image and sexuality among breast cancer survivors. *Support*  
22  
23 *Care Cancer* 2015;**23**:2551–9. doi:10.1007/s00520-015-2612-1  
24  
25  
26  
27 11 McGrath RE, Hall-Simmonds A, Goldberg LR. Are Measures of Character and  
28  
29 Personality Distinct? Evidence From Observed-Score and True-Score  
30  
31 Analyses. *Assessment* 2020;**27**:117–35. doi:10.1177/1073191117738047  
32  
33  
34  
35 12 Peterson C, Seligman ME. *Character strengths and virtues A handbook and*  
36  
37 *classification*. New York: : Oxford University Press 2004.  
38  
39  
40 13 Seligman M. Flourish: a visionary new understanding of happiness and well-  
41  
42 being. In: *Choice Reviews Online*. 2011. 48-7217-48–7217.  
43  
44  
45 doi:10.5860/choice.48-7217  
46  
47  
48 14 Shimai S, Otake K, Park N, *et al.* Convergence of character strengths in  
49  
50 American and Japanese young adults. *J Happiness Stud* 2006;**7**:311–22.  
51  
52  
53 doi:10.1007/s10902-005-3647-7  
54  
55  
56  
57  
58  
59  
60

- 1  
2  
3  
4 15 Baumann D, Ruch W, Margelisch K, *et al.* Character Strengths and Life  
5  
6 Satisfaction in Later Life: an Analysis of Different Living Conditions. *Appl Res*  
7  
8 *Qual Life* Published Online First: 2019. doi:10.1007/s11482-018-9689-x  
9  
10  
11  
12 16 Chan CWH, Chang AM. Stress associated with tasks for family caregivers of  
13  
14 patients with cancer in Hong Kong. *J Adv Nurs* 1999;**29**:484–9.  
15  
16 doi:10.1097/00002820-199908000-00002  
17  
18  
19 17 So WKW, Choi KC, Chen JMT, *et al.* Quality of life in head and neck cancer  
20  
21 survivors at 1 year after treatment: the mediating role of unmet supportive care  
22  
23 needs. *Support Care Cancer* 2014;**22**:2917–26. doi:10.1007/s00520-014-2278-  
24  
25 0  
26  
27  
28  
29  
30 18 Wagner L, Ruch W. Good character at school: Positive classroom behavior  
31  
32 mediates the link between character strengths and school achievement. *Front*  
33  
34 *Psychol* 2015;**6**:1-13. doi:10.3389/fpsyg.2015.00610  
35  
36  
37  
38 19 Lim YJ. Relations between virtues and positive mental health in a Korean  
39  
40 population: A Multiple Indicators Multiple Causes (MIMIC) model approach.  
41  
42 *Int J Psychol* 2015;**50**:272–8. doi:10.1002/ijop.12096  
43  
44  
45  
46 20 McGrath RE. Character strengths in 75 nations: An update. *J Posit Psychol*  
47  
48 2015;**10**:41–52. doi:10.1080/17439760.2014.888580  
49  
50  
51 21 Hanks RA, Rapport LJ, Waldron-Perrine B, *et al.* Role of character strengths in  
52  
53 outcome after mild complicated to severe traumatic brain injury: A positive  
54  
55 psychology study. *Arch Phys Med Rehabil* 2014;**95**:2096–102.  
56  
57  
58  
59 doi:10.1016/j.apmr.2014.06.017  
60

- 1  
2  
3  
4 22 Macaskill A. Review of Positive Psychology Applications in Clinical Medical  
5  
6 Populations. *Healthcare* 2016;**4**:66. doi:10.3390/healthcare4030066  
7  
8  
9 23 Yan T, Chan CWH, Chow KM, *et al.* A systematic review of the effects of  
10  
11 character strengths-based intervention on the psychological well-being of  
12  
13 patients suffering from chronic illnesses. *J Adv Nurs* 2020;**76**:1567–80.  
14  
15  
16  
17 doi:10.1111/jan.14356  
18  
19 24 Ruch W, Proyer RT. Mapping strengths into virtues: The relation of the 24  
20  
21 VIA-strengths to six ubiquitous virtues. *Front Psychol* 2015;**6**:1–12.  
22  
23  
24  
25 doi:10.3389/fpsyg.2015.00460  
26  
27 25 Markus HR, Kitayama S. Culture and the self: Implications for cognition,  
28  
29 emotion, and motivation. *Psychol Rev* 1991;**98**:224–53. doi:10.1037/0033-  
30  
31 295X.98.2.224  
32  
33  
34  
35 26 Chan CWH, Law BMH, So WKW, *et al.* Novel strategies on personalized  
36  
37 medicine for breast cancer treatment: An update. *Int J Mol Sci* 2017;**18**:2423.  
38  
39  
40  
41 doi:10.3390/ijms18112423  
42  
43 27 O’Brien BC, Harris IB, Beckman TJ, *et al.* Standards for reporting qualitative  
44  
45 research: A synthesis of recommendations. *Acad Med* 2014;**89**:1245–51.  
46  
47  
48  
49 doi:10.1097/ACM.0000000000000388  
50  
51 28 Lusardi P. Qualitative Research in Nursing: Advancing the Humanistic  
52  
53 Imperative. *Nurs Res* 1996;**45**:62. doi:10.1097/00006199-199601000-00014  
54  
55  
56  
57  
58  
59  
60

- 1  
2  
3  
4 29 Henderson PD, Gore S V., Davis BL, *et al.* African American women coping  
5 with breast cancer: a qualitative analysis. *Oncol Nurs Forum* 2003;**30**:641–7.  
6  
7 doi:10.1188/03.ONF.641-647  
8  
9  
10  
11 30 Pitre NY, Myrick F. A view of nursing epistemology through reciprocal  
12 interdependence: towards a reflexive way of knowing. *Nurs Philos* 2007;**8**:73–  
13  
14 84. doi:10.1111/j.1466-769X.2007.00298.x  
15  
16  
17  
18 31 Palinkas LA, Horwitz SM, Green CA, *et al.* Purposeful Sampling for  
19  
20 Qualitative Data Collection and Analysis in Mixed Method Implementation  
21  
22 Research. *Adm Policy Ment Heal Ment Heal Serv Res* 2015;**42**:533–44.  
23  
24  
25  
26  
27  
28  
29  
30 32 Ritchie J, Spencer L. Qualitative data analysis for applied policy research. In:  
31  
32 *Analyzing qualitative data*. 2010. 173–94.  
33  
34  
35  
36  
37  
38 33 Barasteh S, Rassouli M, Parandeh A, *et al.* Palliative care in the health system  
39  
40 of Iran: A review of the present status and the future challenges. *Asian Pacific*  
41  
42 *J Cancer Prev* 2020;**21**:845–51. doi:10.31557/APJCP.2020.21.3.845  
43  
44  
45  
46 34 Fox DE, Quinn RR, James MT, *et al.* Social Support in the Peritoneal Dialysis  
47  
48 Experience: A Qualitative Descriptive Study. *Can J Kidney Heal Dis* 2020;**7**.  
49  
50  
51  
52  
53  
54 35 Sandelowski M. The problem of rigor in qualitative research. *ANS Adv Nurs*  
55  
56 *Sci* 1986;**8**:27–37. doi:10.1097/00012272-198604000-00005  
57  
58  
59  
60

- 1  
2  
3  
4 36 Guse T, Hudson D. Psychological strengths and posttraumatic growth in the  
5  
6 successful reintegration of South African ex-offenders. *Int J Offender Ther*  
7  
8  
9 *Comp Criminol* 2014;**58**:1449–65. doi:10.1177/0306624X13502299  
10  
11  
12 37 Niemiec RM. *Character strengths interventions. A field guide for practitioners.*  
13  
14 Boston, MA: : Hogrefe Publishing 2018.  
15  
16  
17 38 Li J. Humility in learning: A Confucian perspective. *J Moral Educ*  
18  
19 2016;**45**:147–65. doi:10.1080/03057240.2016.1168736  
20  
21  
22 39 Guo Z. Chinese Confucian culture and the medical ethical tradition. *J Med*  
23  
24 *Ethics* 1995;**21**:239–46. doi:10.1136/jme.21.4.239  
25  
26  
27 40 Tang X, Li Y, Duan W, *et al.* Character strengths lead to satisfactory  
28  
29 educational outcomes through strength use: A longitudinal analysis. *Front*  
30  
31 *Psychol* 2019;**10**:1-9. doi:10.3389/fpsyg.2019.01829  
32  
33  
34  
35 41 Ling M, Wang X, Ma Y, *et al.* A Review of the Current State of Hospice Care  
36  
37 in China. *Curr Oncol Rep* 2020;**22**:1–7. doi:10.1007/s11912-020-00959-y  
38  
39  
40 42 Waters LE. Strength-based parenting and life satisfaction in teenagers. *Adv Soc*  
41  
42 *Sci Res J* 2015;**2**:158–173. doi:10.14738/assrj.211.1551  
43  
44  
45 43 Spiegel D. Psychosocial aspects of breast cancer treatment. *Semin Oncol*  
46  
47 1997;**24**:S1-36-S1-47.  
48  
49  
50 44 Moale AC, Rajasekhara S, Ueng W, *et al.* Educational intervention enhances  
51  
52 clinician awareness of Christian, Jewish, and Islamic teachings around end-of-  
53  
54 life care. *J Palliat Med* 2019;**22**:62–70. doi:10.1089/jpm.2018.0077  
55  
56  
57  
58  
59  
60

- 1  
2  
3  
4 45 Lundman B, Aléx L, Jonsén E, *et al.* Inner strength-A theoretical analysis of  
5  
6 salutogenic concepts. *Int J Nurs Stud* 2010;**47**:251–60.  
7  
8  
9 doi:10.1016/j.ijnurstu.2009.05.020  
10  
11  
12 46 Roux G, Dingley C, Bush H. Inner Strength in Women: Metasynthesis of  
13  
14 Qualitative Findings in Theory Development. *J Theory Constr Test* 2002;**6**:86.  
15  
16  
17 47 Janssen BM, Van Regenmortel T, Abma TA. Identifying sources of strength:  
18  
19 Resilience from the perspective of older people receiving long-term community  
20  
21 care. *Eur J Ageing* 2011;**8**:145–56. doi:10.1007/s10433-011-0190-8  
22  
23  
24 48 Duan W, Ho SMY. Three-Dimensional Model of Strengths: Examination of  
25  
26 Invariance Across Gender, Age, Education Levels, and Marriage Status.  
27  
28  
29  
30  
31  
32  
33  
34  
35  
36  
37  
38  
39  
40  
41 50 Park N, Peterson C, Seligman MEP. Strengths of character and well-being. *J*  
42  
43  
44  
45  
46  
47  
48  
49  
50  
51  
52  
53  
54  
55  
56  
57  
58  
59  
60

Standards for Reporting Qualitative Research (SRQR)—checklist of items that should be included in reports of Qualitative studies

|                                              | Item No | Recommendation                                                                                                                                                                                                                                                                                                                                   | Page No |
|----------------------------------------------|---------|--------------------------------------------------------------------------------------------------------------------------------------------------------------------------------------------------------------------------------------------------------------------------------------------------------------------------------------------------|---------|
| <b>Title and abstract</b>                    |         |                                                                                                                                                                                                                                                                                                                                                  |         |
| <b>Title</b>                                 | 1       | Concise description of the nature and topic of the study Identifying the study as qualitative or indicating the approach (e.g., ethnography, grounded theory) or data collection methods (e.g., interview, focus group) is recommended                                                                                                           | 1       |
| <b>Abstract</b>                              | 2       | Summary of key elements of the study using the abstract format of the intended publication; typically includes background, purpose, methods, results, and conclusions                                                                                                                                                                            | 2       |
| <b>Introduction</b>                          |         |                                                                                                                                                                                                                                                                                                                                                  |         |
| Problem formulation                          | 3       | Description and significance of the problem/phenomenon studied; review of relevant theory and empirical work; problem statement                                                                                                                                                                                                                  | 4       |
| Purpose or research question                 | 4       | Purpose of the study and specific objectives or questions                                                                                                                                                                                                                                                                                        | 6       |
| <b>Methods</b>                               |         |                                                                                                                                                                                                                                                                                                                                                  |         |
| Qualitative approach and research paradigm   | 5       | Qualitative approach (e.g., ethnography, grounded theory, case study, phenomenology, narrative research) and guiding theory if appropriate; identifying the research paradigm (e.g., postpositivist, constructivist/interpretivist) is also recommended; rationale <sup>b</sup>                                                                  | 7       |
| Researcher characteristics and reflexivity   | 6       | Researchers' characteristics that may influence the research, including personal attributes, qualifications/experience, relationship with participants, assumptions, and/or presuppositions; potential or actual interaction between researchers' characteristics and the research questions, approach, methods, results, and/or transferability | 8       |
| Context                                      | 7       | Setting/site and salient contextual factors; rationale <sup>b</sup>                                                                                                                                                                                                                                                                              | 9       |
| Sampling strategy                            | 8       | How and why research participants, documents, or events were selected; criteria for deciding when no further sampling was necessary (e.g., sampling saturation); rationale <sup>b</sup>                                                                                                                                                          | 7       |
| Ethical issues pertaining to human subjects  | 9       | Documentation of approval by an appropriate ethics review board and participant consent, or explanation for lack thereof; other confidentiality and data security issues                                                                                                                                                                         | 12      |
| Data collection methods                      | 10      | Types of data collected; details of data collection procedures including (as appropriate) start and stop dates of data collection and analysis, iterative process, triangulation of sources/methods, and modification of procedures in response to evolving study findings; rationale <sup>b</sup>                                               | 8       |
| Data collection instruments and technologies | 11      | Description of instruments (e.g., interview guides, questionnaires) and devices (e.g., audio recorders) used for data collection; if/how the instrument(s) changed over the course of the study                                                                                                                                                  | 9       |
| Units of study                               | 12      | Number and relevant characteristics of participants, documents, or events included in the study; level of participation (could be reported in results)                                                                                                                                                                                           | 13      |
| Data processing                              | 13      | Methods for processing data prior to and during analysis, including transcription, data entry, data management and security, verification of data integrity, data coding, and anonymization/deidentification of excerpts                                                                                                                         | 9       |



|                                                                                              |    |                                                                                                                                                                                                                                                                                                       |       |
|----------------------------------------------------------------------------------------------|----|-------------------------------------------------------------------------------------------------------------------------------------------------------------------------------------------------------------------------------------------------------------------------------------------------------|-------|
| Data analysis                                                                                | 14 | Process by which inferences, themes, etc., were identified and developed, including the researchers involved in data analysis; usually references a specific paradigm or approach; rationale <sup>b</sup>                                                                                             | 10    |
| Techniques to enhance trustworthiness                                                        | 15 | Techniques to enhance trustworthiness and credibility of data analysis (e.g., member checking, audit trail, triangulation); rationale <sup>b</sup>                                                                                                                                                    | 12    |
| (Table continues)                                                                            |    |                                                                                                                                                                                                                                                                                                       |       |
| <b>Results /findings</b>                                                                     |    |                                                                                                                                                                                                                                                                                                       |       |
| Synthesis and interpretation                                                                 | 16 | Main findings (e.g., interpretations, inferences, and themes); might include development of a theory or model, or integration with prior research or theory                                                                                                                                           | 14-22 |
| Links to empirical data                                                                      | 17 | Evidence (e.g., quotes, field notes, text excerpts, photographs) to substantiate analytic findings                                                                                                                                                                                                    | 16-18 |
| <b>Discussion</b>                                                                            |    |                                                                                                                                                                                                                                                                                                       |       |
| Integration with prior work, implications, transferability, and contribution(s) to the field | 18 | Short summary of main findings; explanation of how findings and conclusions connect to, support, elaborate on, or challenge conclusions of earlier scholarship; discussion of scope of application/generalizability; identification of unique contribution(s) to scholarship in a discipline or field | 22-25 |
| Limitations                                                                                  | 19 | Trustworthiness and limitations of findings                                                                                                                                                                                                                                                           | 27    |
| <b>Other</b>                                                                                 |    |                                                                                                                                                                                                                                                                                                       |       |
| Conflicts of interest                                                                        | 20 | Potential sources of influence or perceived influence on study conduct and conclusions; how these were managed                                                                                                                                                                                        | 29    |
| Funding                                                                                      | 21 | Sources of funding and other support; role of funders in data collection, interpretation, and reporting                                                                                                                                                                                               | 29    |

<sup>a</sup>The authors created the SRQR by searching the literature to identify guidelines, reporting standards, and critical appraisal criteria for qualitative research; reviewing the reference lists of retrieved sources; and contacting experts to gain feedback. The SRQR aims to improve the transparency of all aspects of qualitative research by providing clear standards for reporting qualitative research.

<sup>b</sup>The rationale should briefly discuss the justification for choosing that theory, approach, method, or technique rather than other options available, the assumptions and limitations implicit in those choices, and how those choices influence study conclusions and transferability. As appropriate, the rationale for several items might be discussed together.

**Note:** BC O'Brien, Harris, I. B. , Beckman, T. J. , Reed, D. A. , & Cook, D. A. . (2014). Standards for reporting qualitative research: a synthesis of recommendations. *Academic Medicine*, 89(9), 1245-1251.

# BMJ Open

## Experiences and perception of character strengths among patients with breast cancer in China: A qualitative study

|                                 |                                                                                                                                                                                                                                                                                        |
|---------------------------------|----------------------------------------------------------------------------------------------------------------------------------------------------------------------------------------------------------------------------------------------------------------------------------------|
| Journal:                        | <i>BMJ Open</i>                                                                                                                                                                                                                                                                        |
| Manuscript ID                   | bmjopen-2022-061994.R1                                                                                                                                                                                                                                                                 |
| Article Type:                   | Original research                                                                                                                                                                                                                                                                      |
| Date Submitted by the Author:   | 02-Sep-2022                                                                                                                                                                                                                                                                            |
| Complete List of Authors:       | Yan, Tingting; Peking University, School of Nursing<br>Chan, Carmen Wing Han; The Chinese University of Hong Kong, The Nethersole School of Nursing<br>Chow, Ka; Chinese University of Hong Kong, The Nethersole School of Nursing<br>Li, Mingzi; Peking University, School of Nursing |
| <b>Primary Subject Heading</b>: | Palliative care                                                                                                                                                                                                                                                                        |
| Secondary Subject Heading:      | Mental health, Qualitative research                                                                                                                                                                                                                                                    |
| Keywords:                       | Breast tumours < ONCOLOGY, Adult palliative care < PALLIATIVE CARE, PSYCHIATRY, QUALITATIVE RESEARCH, Adult psychiatry < PSYCHIATRY                                                                                                                                                    |
|                                 |                                                                                                                                                                                                                                                                                        |

SCHOLARONE™  
Manuscripts



I, the Submitting Author has the right to grant and does grant on behalf of all authors of the Work (as defined in the below author licence), an exclusive licence and/or a non-exclusive licence for contributions from authors who are: i) UK Crown employees; ii) where BMJ has agreed a CC-BY licence shall apply, and/or iii) in accordance with the terms applicable for US Federal Government officers or employees acting as part of their official duties; on a worldwide, perpetual, irrevocable, royalty-free basis to BMJ Publishing Group Ltd ("BMJ") its licensees and where the relevant Journal is co-owned by BMJ to the co-owners of the Journal, to publish the Work in this journal and any other BMJ products and to exploit all rights, as set out in our [licence](#).

The Submitting Author accepts and understands that any supply made under these terms is made by BMJ to the Submitting Author unless you are acting as an employee on behalf of your employer or a postgraduate student of an affiliated institution which is paying any applicable article publishing charge ("APC") for Open Access articles. Where the Submitting Author wishes to make the Work available on an Open Access basis (and intends to pay the relevant APC), the terms of reuse of such Open Access shall be governed by a Creative Commons licence – details of these licences and which [Creative Commons](#) licence will apply to this Work are set out in our licence referred to above.

Other than as permitted in any relevant BMJ Author's Self Archiving Policies, I confirm this Work has not been accepted for publication elsewhere, is not being considered for publication elsewhere and does not duplicate material already published. I confirm all authors consent to publication of this Work and authorise the granting of this licence.

1  
2  
3  
4 **·Experiences and perception of character strengths among patients**  
5  
6  
7 **with breast cancer in China: A qualitative study**  
8  
9

10  
11 Tingting YAN **PhD**<sup>1</sup>;

12 Carmen W. H. CHAN **PhD, Professor**<sup>2</sup>;

13 Ka Ming CHOW **DNur, Assistant Professor**<sup>2</sup>;

14 Mingzi Li, **PhD, Professor**<sup>1</sup>.

15  
16  
17  
18  
19  
20 **Affiliations:**

21 1 School of Nursing, Peking University, Beijing, China.

22 2 The Nethersole School of Nursing, The Chinese University of Hong Kong, New  
23 Territories, Hong Kong SAR, China  
24  
25

26  
27  
28  
29 **Correspondence:**

30 Dr. Mingzi Li, School of Nursing, Peking University, No. 38 Xueyuan Road, Haidian  
31 District, 100191 Beijing, China.

32 **E-mail:** limingzi2000@163.com  
33  
34  
35  
36  
37  
38  
39  
40  
41  
42  
43  
44  
45  
46  
47  
48  
49  
50  
51  
52  
53  
54  
55  
56  
57  
58  
59  
60

## Abstract

**Objective** To explore the patients' experiences on character strengths that Chinese patients experience after the diagnosis of breast cancer.

**Design** A qualitative, exploratory study using semi-structured interviews based on the patients' lived experience with diagnosed with breast cancer. Ethics approval was granted. Interviews were audio-recorded and transcribed verbatim. Values in Action Classification of Strengths provided conceptual framework for analysing strengths. Directed content analysis based on the classification of strengths and framework analysis were used to analyse transcribed data. The Standards for Reporting Qualitative Research (SRQR) guideline was followed.

**Setting** The Second Affiliated Hospital of Zhengzhou University and Henan Provincial Cancer Hospital in China.

**Participants** Adult patients over 18 years, diagnosed with breast cancer between October 2019 and December 2020 were recruited. We used purposive sample method to collected data from 24 participants diagnosed with breast cancer.

**Results** Six themes (virtues) emerged from our analysis. In addition, two new subthemes (character strengths) emerged in this study, selflessness and pragmatism respectively. Patients with breast cancer described a large repertoire of character strengths they used or wished for during survivorship, including gratitude, hope, humility, kindness, humor, honesty, and forgiveness. Cultural values (e.g. collectivism, familism, Confucianism and Buddhist beliefs) helped structure the experiences of Chinese patients' character strengths. Patients wanted their character strengths to be more noticed, appreciated and encouraged by others and reported their psychological trajectory of using personal strengths.

1  
2  
3 **Conclusion** The findings indicated that patients with breast cancer believing character  
4 strengths are important to them. Medical staff should pay more attention to motivating  
5 and cultivating breast cancer patients' character strengths. Attention to make strength-  
6 based practices workable in clinical health promotion programmes is necessary. The  
7 healthcare system should develop tailored individualised psychological services that  
8 specifically address patients' needs for the application of personalised character  
9 strengths.  
10  
11  
12  
13  
14  
15  
16  
17  
18  
19  
20

## 21 **KEYWORDS**

22  
23  
24 Breast cancer, character strengths, descriptive research, female, framework analysis,  
25 psycho-oncology, well-being, individualised service  
26  
27  
28  
29

## 30 **Strengths and limitations of this study**

- 31  
32  
33 ▶ The qualitative design was used to explore the breast cancer patients' complex  
34 experiences, beliefs and behaviours on character strengths.  
35  
36 ▶ Semi structured individual interviews provided time and scope for participants to  
37 give detailed information about their opinions regarding character strengths.  
38  
39 ▶ As qualitative methods prohibit generalisation, despite the data saturation  
40 achieved, there are results regarding transferability to other patients and different  
41 settings that should be interpreted with caution.  
42  
43  
44  
45  
46  
47  
48  
49  
50  
51  
52  
53  
54  
55  
56  
57  
58  
59  
60

## Introduction

Strength-based approaches are receiving increasing international attention [1], and are being applied to solve longitudinal clinical problems, such as promoting well-being and limiting ill-health [2]. Recognising and using individuals' strengths leads to positive outcomes, such as coping, recovery and greater meaning in life [3]. Instead of focusing on problems [4], researchers have proposed that character strengths should be incorporated into clinical practice to help clients enhance well-being [5]. Character is the positive and socially valued elements of personality, which have a moral component [6]. Character strengths are the core theme of positive psychology, and are a cluster of positive traits or dispositions manifested in values, thoughts, feelings, and behaviours. These personal strengths involve positive psychological qualities referring to the self, others and the world [7]. In one practical case, strength-based approaches were adopted by clinicians to help breast cancer patients deal with the continuing challenges of survivorship [8].

Problem-oriented health care methods often overlook patients' strengths. The character strengths of patients with breast cancer have consequently received little attention [9]. Moreover, the majority of studies on character strengths have been conducted in Western countries [9,10]. The experiences and perception of character strengths among patients with breast cancer vary contextually, and the results of previous studies may not be directly applicable to Chinese breast cancer patients due to their social and cultural differences from Western patients [11].

1  
2  
3  
4 Character strengths promote the individual's positive cognition, emotions, and  
5  
6 behaviours. Concentrating on strengths allows individuals to focus on more than  
7  
8 avoiding distress or disorder [12]. Previous studies have demonstrated that character  
9  
10 strengths are positively associated with quality of life, well-being, happiness and  
11  
12 general health [13]. Evidence is increasing that people who use their strengths on a  
13  
14 regular basis have higher levels of well-being [14]. However, medical staff and  
15  
16 caregivers tend to underestimate the personal strengths of cancer patients [15].  
17  
18 Standardised, problem-oriented care may diminish patients' chances of achieving the  
19  
20 best possible recovery [16].  
21  
22  
23  
24  
25  
26  
27  
28  
29

### 30 **Theoretical framework**

31  
32 The most extensively researched model of character strengths is the Values in  
33  
34 Action Classification of Strengths and Virtues (VIA classification) [7]. The VIA  
35  
36 classification is a theory-driven framework comprising 24-character strengths  
37  
38 conceptually organised as reflections of six virtues: wisdom, courage, humanity,  
39  
40 justice, temperance and transcendence. Studies of different cultures have revealed  
41  
42 character strengths in different populations, including adolescents [17], college  
43  
44 students [18], adults [6] and the elderly [2]. The classification model has been  
45  
46 validated in 75 nations, with each sample including at least 150 respondents; these  
47  
48 findings suggest substantial cross-cultural similarity in strengths [19]. Virtues are  
49  
50 classes of character strengths that show individual differences but relative cross-  
51  
52 cultural stability [20]. The character strengths perspective has been recognised in the  
53  
54  
55  
56  
57  
58  
59  
60



1  
2  
3  
4 field of psychological counselling and rehabilitation as a way to understand  
5  
6 psychosocial adaptation to chronic diseases, especially cancer [21]. Because chronic  
7  
8 diseases manifest themselves through a wide variety of symptoms and functional  
9  
10 limitations [22], the specific meaning of character strengths are likely to vary across  
11  
12 specific illnesses, cultural contexts and individuals. The six core virtue categories are  
13  
14 universal, but these strengths are based on theoretical foundations [23]. Given that  
15  
16 culture plays an important role in individuals' values, assumptions and needs [24], the  
17  
18 character strengths of breast cancer patients may have different meanings and  
19  
20 manifestations across different cultures. Moreover, researchers have highlighted the  
21  
22 specific differences in the mental functioning of patients with various diseases and  
23  
24 that of healthy individuals [25]. Therefore, a study of the character strengths of breast  
25  
26 cancer patients within the Chinese context is expected to further strengthen the  
27  
28 theoretical VIA classification.  
29  
30  
31  
32  
33  
34  
35  
36  
37

38 The evidence so far indicates that character strengths are a helpful personal  
39  
40 resource [2]. However, there is a gap in the literature concerning how breast cancer  
41  
42 patients identify their own strengths and use them. The applicability of the VIA  
43  
44 classification among Chinese breast cancer patients is still unclear. Cultural values,  
45  
46 such as collectivism, the importance of family, Confucianism and Buddhism could  
47  
48 strongly determine how character strengths are expressed and the associated  
49  
50 behaviour patterns. For example, Confucianism is a uniquely Chinese cultural concept  
51  
52 that influences the definition of character strengths. This means that cultural factors  
53  
54 play an important role in the theory of strengths. In this study, we explore the  
55  
56  
57  
58  
59  
60

1  
2  
3  
4 experiences and perception of character strengths among Chinese women with breast  
5  
6 cancer.  
7  
8  
9

## 10 11 **Methods**

### 12 13 **Study design and population**

14  
15  
16  
17 In this qualitative study, we use a descriptive and exploratory approach to  
18  
19 uncover aspects of the experiences and perceptions of character strengths in Chinese  
20  
21 women with breast cancer. Semi-structured individual interviews were conducted.  
22  
23 The Standards for Reporting Qualitative Research (SRQR) were followed [26].  
24  
25

26  
27 The researchers used a maximum variation sampling method and purposive  
28  
29 sampling technique to recruit participants to richly or densely describe the culture or  
30  
31 phenomenon of interest [27]. Regarding the sample size, the recruitment of  
32  
33 interviewees stopped when the data reached a saturation point, indicating that the  
34  
35 phenomenon could be understood comprehensively without further recruitment. Data  
36  
37 saturation was achieved through repetition and confirmation of the information  
38  
39 obtained by participants, i.e. no new insights emerged from the interview data of the  
40  
41 last two included participants [28].  
42  
43  
44  
45  
46  
47

48  
49 The inclusion criteria were as follows: the patients were (a) women with a  
50  
51 confirmed diagnosis of breast cancer; (b) aged above 18 years old; (c) native Chinese;  
52  
53 (d) willing to participate in the study and offer informed consent. The exclusion  
54  
55 criteria were as follows: the patient suffered from (a) one or more other life-  
56  
57  
58  
59  
60

1  
2  
3  
4 threatening diseases, or (b) psychosis (for example, delusional disorder,  
5  
6 schizophrenia).

## 11 **Patient and public involvement**

12  
13  
14 Patients and/or the public were not involved in the design, conduct, reporting or  
15  
16 dissemination plans of this research.

## 22 **Data collection**

23  
24 We used semi-structured interviews to foster interactivity and dialogue [29].  
25  
26 The instruments used in this study included a demographic data sheet and a semi-  
27  
28 structured interview guide. The demographic data sheet was devised to obtain  
29  
30 information on the patient's age, marital status, educational level and types of breast  
31  
32 cancer treatment. The interview guide was informed by the positive psychology  
33  
34 model of character strengths and the previous literature. The interviews opened with a  
35  
36 short introduction to the topic (e.g., a definition and explanation of 'character  
37  
38 strengths'). Each interview included eight questions designed to encourage discussion  
39  
40 on perceptions and beliefs about character strengths (Table 1). Pilot interviews were  
41  
42 conducted with three breast cancer patients to check the appropriateness of the  
43  
44 interview process and the accessibility of the questions. The demographic data sheet  
45  
46 took approximately five minutes to complete, and the whole interview took  
47  
48 approximately 30 to 60 minutes.  
49  
50  
51  
52  
53  
54  
55  
56  
57  
58  
59  
60

Participant recruitment and interviews were conducted in November and December 2019 in two provincial tertiary hospitals in mainland China. To ensure consistency, the same researcher conducted all of the interviews [30]. The participants were asked for reflections and conclusions to prevent misunderstandings or omissions. Data collection was performed using audiotape recording, supplemented with handwritten notes on non-verbal behaviours and impressions.

**Table 1** Semi-structured interview guide used in this study

- 
1. From your perspective, what is your perception of character strengths?
  2. Can you share your experiences on your character strengths?
  3. Why did you use your character strengths?
  4. When you used your character strengths, were you more broadly interested in better understanding of yourself?
  5. What did you hope to achieve by your character strengths?
  6. What benefits did you expect to receive as a result of using your character strengths?
  7. In your opinion, what are the most important benefits or outcomes that have resulted from your character strengths?
  8. When you used your character strengths, were you looking for a solution to a specific problem or difficult situation?
  9. In what way(s) have your character strengths affected your daily life?
  10. In what way(s) have your character strengths help you met your expectations and/or needs?
- 

## Data Analysis

Directed content analysis and framework analysis were used to analyse the data in an combination of inductive and deductive approaches [31]. The analysis took place in five stages: (1) Stage 1, Familiarisation: Immersion in the data by repeatedly reading transcriptions and making field notes; (2) Stage 2, Analytical framework development: Preparing key topics, identifying important themes and developing the

1  
2  
3  
4 thematic framework, (3) Stage 3, Indexing: Completing data structuring and pilot  
5  
6 charting, refining and combining themes and sub-themes, (4) Stage 4, Charting:  
7  
8 Drawing summary chart and transferring data into the framework matrix, and (5)  
9  
10 Stage 5, Data mapping and interpreting: Comparing the analysis results to the original  
11  
12 data and explaining the relationship between codes, subthemes and themes [32]. The  
13  
14 VIA classification was used as the guiding framework for direct content analysis. This  
15  
16 framework is described in Table 2. The findings were presented in a synthesised form  
17  
18 of themes (virtues) and sub-themes (character strengths). No particular data software  
19  
20 was used for coding or organisational purposes. We not only sought to establish a  
21  
22 critical and common sense understanding of the text, but also to analyse it beyond  
23  
24 personal experience. We also looked for embedded character strengths in the content.  
25  
26 The themes and sub-themes were collected in a Microsoft Excel spreadsheet, with  
27  
28 supporting descriptions and quotes. Demographic data were analysed using SPSS  
29  
30 version 22.0 (SPSS, Inc., Chicago, IL) and descriptive statistics were obtained  
31  
32 (frequencies, means, standard deviations and percentages).  
33  
34  
35  
36  
37  
38  
39  
40  
41  
42  
43  
44

45 **Table 2** The Values in Action classification of virtues and character strengths

| Virtues                                                                                          | Character strengths                                           | Multiple descriptions, pronouns, and manifestations                                                                                                                                                                                                                                                                                                  |
|--------------------------------------------------------------------------------------------------|---------------------------------------------------------------|------------------------------------------------------------------------------------------------------------------------------------------------------------------------------------------------------------------------------------------------------------------------------------------------------------------------------------------------------|
| 1. Wisdom & Knowledge<br><i>Cognitive strengths related to attaining and using new knowledge</i> | Creativity<br><br>Curiosity<br><br>Judgment & Open-Mindedness | [originality, ingenuity, discovering new and innovative ways to do things, thinking of novel and productive ways to do things]<br>[openness to experience, taking an interest in all of ongoing experience, enthusiastically exploring and discovering new things]<br>[critical thinking, thinking things through and examining them from all sides] |

|                                                                                                                  |                                       |                                                                                                                                                                  |
|------------------------------------------------------------------------------------------------------------------|---------------------------------------|------------------------------------------------------------------------------------------------------------------------------------------------------------------|
|                                                                                                                  | Love of Learning                      | [Relishing in the acquisition of new skills and knowledge, mastering new skills, topics, and bodies of knowledge]                                                |
|                                                                                                                  | Perspective                           | [wisdom, providing wise counsel to others]                                                                                                                       |
| 2. Courage<br><i>Emotional strengths that involve working hard to accomplish goals in the face of opposition</i> | Bravery                               | [valor, not withdrawing or shrinking from threat, challenge, difficulty, or pain]                                                                                |
|                                                                                                                  | Perseverance                          | [persistence, finishing what one starts, industriousness, working hard to finish what is started]                                                                |
|                                                                                                                  | Honesty                               | [authenticity, integrity, speaking the truth and presenting oneself in a genuine and authentic way]                                                              |
|                                                                                                                  | Zest                                  | [vitality, enthusiasm, vigor, energy, Approaching life with excitement and energy]                                                                               |
| 3. Humanity<br><i>Interpersonal strengths that involve developing relationships and caring for other people</i>  | Capacity to Love and Be Loved         | [Valuing close relations with others]                                                                                                                            |
|                                                                                                                  | Kindness                              | [generosity, doing favors, nurturance, care, compassion, altruistic love, being generous and doing good deeds]                                                   |
|                                                                                                                  | Social Intelligence                   | [emotional intelligence, personal intelligence, being aware of the motives and feelings of self and others, knowing how to adapt to different social situations] |
| 4. Justice<br><i>Civic strengths related to be an integral part of a healthy community</i>                       | Teamwork                              | [citizenship, social responsibility, loyalty, Working collaboratively and well as member of a team or a group]                                                   |
|                                                                                                                  | Fairness                              | [Treating all people the same according to notions of fairness and justice and with impartiality]                                                                |
|                                                                                                                  | Leadership                            | [Effectively managing groups to complete activities, organizing group activities and seeing that they happen]                                                    |
| 5. Temperance<br><i>Strengths related to the use of restraint in thoughts, emotions, and behavior</i>            | Forgiveness & Mercy                   | [Forgiving those who have done wrong]                                                                                                                            |
|                                                                                                                  | Modesty & Humility                    | [Being modest and letting one's accomplishments speak for themselves]                                                                                            |
|                                                                                                                  | Prudence                              | [Being cautious about one's actions or choices; not saying or doing things that might later be regretted]                                                        |
|                                                                                                                  | Self-Regulation                       | [Regulating what one feels and does, self-control, Exercising self-control and discipline]                                                                       |
| 6. Transcendence<br><i>Strengths that provide meaning in life and exceed the limits of ordinary experience</i>   | Appreciation of Beauty and Excellence | [awe, wonder, elevation, Noticing and admiring beauty and excellence, and/or skilled performance in all domains of everyday life]                                |
|                                                                                                                  | Gratitude                             | [Being aware of and thankful for the good things that happen]                                                                                                    |
|                                                                                                                  | Hope                                  | [optimism, future-mindedness, future orientation, Expecting the best in the future, and working actively to achieve it]                                          |

|                              |                                                                                                                                      |
|------------------------------|--------------------------------------------------------------------------------------------------------------------------------------|
| Humor                        | [playfulness, enjoying laughter and amusing others, liking to laugh and joke, bringing smiles to other people]                       |
| Religiousness & Spirituality | [faith, purpose, having beliefs about life that bring comfort, having coherent beliefs about the higher purpose and meaning of life] |

Note. Terms in brackets are variants of the Character strength adapted from Peterson and Seligman (2004).

## Trustworthiness

To increase the credibility of our findings, we used a peer checking process.

Discussion continued until a consensus was reached among the co-researchers [33].

Open dialogue and careful probing were used during the interviews to ensure that the information was reliable. To enhance transferability [34], we continued interviews until data saturation occurred, made clear and distinct descriptions of the content and presented rich information from the findings.

## Ethics

All procedures were in accordance with the guidelines of the Research Ethics Committee of the University (CUHK Approval number: SBREC 19-114) and Joint Chinese University of Hong Kong–New Territories East Cluster Clinical Research Ethics Committee, reference number: 2019.429. A digital code was used to refer to each participant to maintain anonymity.

## Results

### Clinical and demographic characteristics

A total of 24 female breast cancer patients participated in the interviews. The average age of the participants was 52.54 years (range, 30–70 years). Table 3 outlines the participants' characteristics. Most of the participants had stage I/II breast cancer (66.7%), and the remainder (33.3%) had stage III/IV breast cancer. Seventeen participants (70.8%) had breast cancer in the left breast, five (20.8%) had cancer in the right breast and two (8.3%) had bilateral breast cancer.

**Table 3** Demographic information and clinical data of the participants (N = 24)

| Characteristics          | Number            | (%)  |
|--------------------------|-------------------|------|
| Age (years)              |                   |      |
| Mean $\pm$ SD            | 52.54 $\pm$ 11.56 |      |
| Range                    | 30-70             |      |
| Age <60                  | 15                | 62.5 |
| Age $\geq$ 60            | 9                 | 37.5 |
| Marital status           |                   |      |
| Married                  | 21                | 87.5 |
| Unmarried or widow       | 3                 | 12.5 |
| Occupation               |                   |      |
| Employed                 | 17                | 70.8 |
| Unemployed               | 7                 | 29.2 |
| Education states         |                   |      |
| Primary school and below | 10                | 41.7 |
| Junior school            | 4                 | 16.7 |
| Senior high school       | 7                 | 29.2 |
| Bachelor and above       | 3                 | 12.5 |
| Perceived Income         |                   |      |
| Low                      | 3                 | 12.5 |
| Middle                   | 9                 | 37.5 |
| Good                     | 7                 | 29.2 |
| High                     | 5                 | 20.8 |
| Type of cancer           |                   |      |
| Breast cancer            | 24                |      |
| Left                     | 17                | 70.8 |
| Right                    | 5                 | 20.8 |
| Two sides                | 2                 | 8.3  |



|    |                                    |      |      |
|----|------------------------------------|------|------|
| 1  |                                    |      |      |
| 2  |                                    |      |      |
| 3  | Stage of disease                   |      |      |
| 4  | I/II                               | 16   | 66.7 |
| 5  | III/IV                             | 8    | 33.3 |
| 6  |                                    |      |      |
| 7  | Time since diagnosis (months)      |      |      |
| 8  | Mean                               | 8.63 |      |
| 9  |                                    |      |      |
| 10 | Adjuvant therapy                   |      |      |
| 11 | Only had surgery                   | 10   | 41.7 |
| 12 | Also had chemotherapy or radiation | 14   | 58.3 |
| 13 | therapy                            |      |      |
| 14 |                                    |      |      |

15 *Note. Because of rounding, percentages may not total 100.*

### 21 **Character strengths identified within the VIA framework**

22  
 23  
 24 The participants' main character strengths were consistent with the VIA  
 25  
 26 classification; they included cognitive strengths, emotional strengths, civic and  
 27  
 28 community strengths, interpersonal strengths, temperance strengths and transcendence  
 29  
 30 strengths. Table 4 summarises the character strengths of the breast cancer patients.  
 31  
 32 The original 24 strengths were identified in the findings, and two new strengths of  
 33  
 34 selflessness and pragmatism emerged in our study. The themes (virtues) and sub-  
 35  
 36 themes (strengths) are illustrated by sample quotes from the participants (Table 5).  
 37  
 38 The participants also gave their perceptions and comments on the outcomes and  
 39  
 40 expectations of identifying and using individual character strengths. In general, the  
 41  
 42 participants expressed improved self-awareness and a greater sense of purpose and  
 43  
 44 well-being.  
 45  
 46  
 47  
 48  
 49  
 50  
 51  
 52  
 53  
 54  
 55  
 56  
 57  
 58  
 59  
 60

**Table 4** Adapted from values in action classifications of character strengths

| <b>Virtues</b>                      | <b>Character strengths</b>      | <b>Cultural adapted descriptions, pronouns, and manifestations</b>                                                                                                                                                                 |
|-------------------------------------|---------------------------------|------------------------------------------------------------------------------------------------------------------------------------------------------------------------------------------------------------------------------------|
| Cognitive strengths                 | Creativity                      | Ingenuity, doing things in innovative ways, thinking in innovative and unique ways; seeing things in different ways                                                                                                                |
|                                     | Curiosity                       | Interested in all experiences; motivated to discover and explore new things; want to learn about unknown objects, environments or experiences of others                                                                            |
|                                     | Judgment & Open-Mindedness      | The ability to think, understand, analyze, discern or judge rationally, independently and comprehensively; thinking carefully; defensive thinking                                                                                  |
|                                     | Love of Learning                | Studious, be eager to learn, erudite, philomathic; mastering new skills; enjoy new knowledge, enjoy learning                                                                                                                       |
|                                     | Perspective                     | Resourceful, wise, good at planning and handling things; excellent insight and vision, farsighted                                                                                                                                  |
| Emotional strengths                 | Bravery                         | Fearless, courageous, heroic, resolute, brave and bold; not timid, not afraid of danger or difficulty, not shrinking back.                                                                                                         |
|                                     | Perseverance                    | Persevere to the end, no slackness, still persevere after repeated failures; hardworking, not give up halfway; diligent, industrious                                                                                               |
|                                     | Honesty                         | True, honest; integrity, sincere and earnest, wholeheartedly; being true to oneself and others                                                                                                                                     |
|                                     | Zest                            | Enthusiastic about things or others; vigorous vitality; vividness in action, thought or expression, energetic                                                                                                                      |
| Interpersonal strengths             | Capacity to Love and be Loved   | Valuing close relations with others; give love to others, be loved by others; feel the warmth, happiness, satisfaction and beauty in love, friendship, family affection, fraternity and other deep emotions for people and things. |
|                                     | Kindness                        | Benevolent, kind-hearted; generosity, nurturance, charitable; serving others without expectation                                                                                                                                   |
|                                     | Social Intelligence             | Emotional intelligence, aware of the motives and feelings of oneself and others; knowing how to get along can make others comfortable                                                                                              |
|                                     | Teamwork                        | Working collaboratively and well as member of a team or a group, unite and work together to get better results; loyalty to team or group and working well with others                                                              |
| Civic and community strengths       | Fairness                        | Righteousness, uprightness; not afraid of the strong, not bullying the weak, stick to the right way; Treat everyone the same according to justice                                                                                  |
|                                     | Leadership                      | Confucian leadership; influence others, improve the efficiency of the entire group and ensuring team harmony                                                                                                                       |
|                                     | <b>Selflessness<sup>a</sup></b> | Dedication, not self-interested; proud to serve the collective people and ashamed to deviate from the people, proud of unity and mutual assistance, ashamed of self-interest; devotion to family and country.                      |
| Restrained and temperance strengths | Forgiveness & Mercy             | Forgive, ignore the faults of others; tolerant, considerate; not to care about wrongdoing or to hold accountable; compassion                                                                                                       |
|                                     | Modesty & Humility              | Modest, polite, humble; reserved, courteous, not exaggerating one's ability or value; no boasting or arrogance, not complacent; willing to accept criticism, and humbly ask people for advice.                                     |

|                         |                                       |                                                                                                                                                                                              |
|-------------------------|---------------------------------------|----------------------------------------------------------------------------------------------------------------------------------------------------------------------------------------------|
|                         | Prudence                              | Be cautious about actions or choices; solemnly, careful; dependable, stable, calm and not anxious in situations                                                                              |
|                         | Self-Regulation                       | Self-control; disciplined, restraint; managing personal impulses, emotions, laziness and other bad habits                                                                                    |
|                         | <b>Pragmatism<sup>a</sup></b>         | Believe practice leads to true knowledge and wealth, believe actions speak louder than words, try to be practical, realistic, committed to the reality                                       |
| Transcendence strengths | Appreciation of Beauty and Excellence | Appreciate, awe, fascinate and admire the beauty and excellence, and/or all outstanding skills, treasures or people                                                                          |
|                         | Gratitude                             | Being aware of and thankful for the good things that happened, grateful, moved by the virtues of others, grateful for the kindness and favors of others, and seek ways to return             |
|                         | Hope                                  | Optimism, positive future mindedness, full of confidence in what is going on, open-minded and have good wishes for the future                                                                |
|                         | Humor                                 | Funny, humorous, playfulness and enjoy talking witty, bring laughter and amusement to others                                                                                                 |
|                         | Religiousness & Spirituality          | Faith, believe in religion, unwavering belief, a state of mind that has trust or trust in someone or something, extremely convinced of a certain thought, doctrine, and as a personal belief |

<sup>a</sup> Newly emerged themes in the current study

**Table 5** Examples from the participants in character strengths, with their anonymous code number and age

| Character strengths        | Quotes                                                                                                                                                                                                                                                                                                          |
|----------------------------|-----------------------------------------------------------------------------------------------------------------------------------------------------------------------------------------------------------------------------------------------------------------------------------------------------------------|
| Creativity                 | I feel that I always think differently from others of my age. The way I look at things is different. I usually make some fresh and unique gadgets for the children at home (Participant 14, 45).                                                                                                                |
| Curiosity                  | I'm interested in hearing gossip about what's going on between my neighbours and where my relatives have travelled, or finding out what grocery they recommend and where supermarkets are offering cheaper discounts. I'm interested in all these experiences and things, sort of curious (Participant 22, 53). |
| Judgment & Open-Mindedness | I think I'm older, but much wiser than when I was younger. I've been through a lot of things and I'm not so attached and concerned about everything. Nowadays, when things come up again, I think very rationally and calmly about what to do, unlike the young people who are so whiny (Participant 17, 47).   |
| Love of Learning           | I usually learn a new thing, that is, learn to dance the popular square dance to divert my attention. Recently I learnt to play new cellphone apps like Douyin and Kuaishou with my friends. I feel that I do not have time to be unhappy when learning new things (Participant 1, 48).                         |
| Perspective                | My personality is very good, just love to study and love to work. I usually use two mobile phones to study, and all the recordings on the other mobile phone (Participant 11, 30).                                                                                                                              |
| Bravery                    | I think life is only a few decades, like a white horse passing a gap. Sooner or later, it is the same thing. The key is that you must think about it and look down on everything. This is the wisdom of survival (Participant 3, 54).                                                                           |
| Perseverance               | I think I dare to face these things myself. But my body is my own business, I must be brave (Participant 3, 54).                                                                                                                                                                                                |
|                            | My husband can feel that I am strong and persistent. Compared with others, the advantages my character brings is I can be a bit stronger against stress. (Participant 2,                                                                                                                                        |

|    |               |                                                                                              |
|----|---------------|----------------------------------------------------------------------------------------------|
| 1  |               |                                                                                              |
| 2  |               |                                                                                              |
| 3  |               | 67).                                                                                         |
| 4  |               | I worked very hard in my work unit before, just want to get a promotion next year.           |
| 5  |               | Unexpectedly, this illness disrupted the plan (Participant 4, 32).                           |
| 6  | Honesty       | I am an ordinary person, I'm just straight hearted, and then I just say what I think, that   |
| 7  |               | is, I am honest and sincere (Participant 1, 48).                                             |
| 8  | Zest          | Because I am passionate about making friends in the square dance group, now I am             |
| 9  |               | sick and many partners come to see me. I was encouraged when they came (Participant          |
| 10 |               | 10, 52).                                                                                     |
| 11 | Capacity to   | I am filial to my parents-in-law and be a good daughter-in-law. After being sick, I am       |
| 12 | Love and be   | very happy and feel beloved to be taken care of after a long time. I feel that my            |
| 13 | Loved         | families support me and love me (Participant 1, 48).                                         |
| 14 | Kindness      | Then I never did anything bad. Then I felt like I was very nice. I was just being kind to    |
| 15 |               | others. Repay grievances with virtue and be compassionate (Participant 1, 48).               |
| 16 |               | I believe benevolent must be rewarded with kindness. I've always been a good person          |
| 17 |               | (Participant 3, 54).                                                                         |
| 18 | Social        | Every time my family came, I said I was fine and did not want them to worry                  |
| 19 | Intelligence  | (Participant 9, 65).                                                                         |
| 20 | Teamwork      | Three cobblers with their wits combined, equal Zhuge Liang the master mind-                  |
| 21 |               | collective wisdom often proves superior (two heads are better than one) (Participant 4,      |
| 22 |               | 32).                                                                                         |
| 23 |               | I used to work, and I can have a good relationship with my colleagues and                    |
| 24 |               | subordinates (Participant 11, 30).                                                           |
| 25 | Fairness      | Any conflicts between them can be handled fairly no matter what I say. I got this            |
| 26 |               | disease and I cannot do anything now (Participant 11, 30).                                   |
| 27 | Leadership    | I was also a small head in the unit before, and how to allocate jobs to everyone             |
| 28 |               | harmoniously is also a skill, and it can improve the efficiency of the entire department     |
| 29 |               | (Participant 12, 35).                                                                        |
| 30 |               | I have made it to the position of department manager in my organisation and would not        |
| 31 |               | have missed work had I not been ill. I had to get my people's affairs in order before I      |
| 32 |               | was admitted to hospital (Participant 24, 37).                                               |
| 33 |               | I feel that I am selfless. I have sacrificed my whole life, sacrificed for my family, and    |
| 34 |               | cooperated with national policies. I feel that our generation pays more attention to the     |
| 35 |               | collective and puts everyone's interests ahead of their own. This is also written in the     |
| 36 | Selflessness  | Eight Honors and Eight Shames (Participant 13, 60).                                          |
| 37 |               | It is proud to serve the collective people and ashamed to deviate from the people. We        |
| 38 |               | are proud of unity and mutual assistance, and ashamed of self-interest (Participant 16,      |
| 39 |               | 56).                                                                                         |
| 40 | Forgiveness & | Well, I think everyone is good, but many patients are now demanding and dissatisfied         |
| 41 | Mercy         | with the people around them. Sometimes they lose their temper at the small mistakes          |
| 42 |               | of doctors and nurses. It is better to be tolerant and forgive like me (Participant 11, 30). |
| 43 | Modesty &     | My family and patients still thought I was humble. I feel that my personality is simple,     |
| 44 | Humility      | and I get along well with everyone (Participant 5, 52).                                      |
| 45 | Prudence      | I take photographs of the bags of medication that I receive infusions of and the             |
| 46 |               | medication that I take every day. I also keep the bill for each payment. I often talk to     |
| 47 |               | my doctor about my condition and I think that being discreet will give me peace of           |
| 48 |               | mind (Participant 23, 38).                                                                   |
| 49 | Self-         | I felt that my self-discipline was meaningful, so I strengthened my exercise.                |
| 50 | Regulation    | (Participant 8, 55).                                                                         |
| 51 | Pragmatism    | Practice brings real wealth, it speaks louder than words (Participant 3, 54).                |
| 52 |               | I am a pragmatic person, I don't know how to say nice things. I do not afraid and have       |
| 53 |               | no time to feel depressed. I do not want to worry about it. I just want to eat and drink     |
| 54 |               | and do my work. I do not want anything else (Participant 2, 67)                              |
| 55 | Appreciation  | I was reading a novel about the philosophy of life recently. I will read this book after     |
| 56 | of Beauty and | treatment. I feel comfortable appreciating these beautiful things. I also appreciate the     |
| 57 | Excellence    | natural environment and feel better (Participant 12, 35).                                    |
| 58 | Gratitude     | Everyone, whether old or young, should know how to be grateful (Participant 1, 48).          |
| 59 |               | I think the nurses here have given me a lot of help, and the doctors respect my ideas        |
| 60 |               | and help me with treatment. I am very grateful to them. The services in the hospital are     |

|                              |                                                                                                                                                                                                                                                        |
|------------------------------|--------------------------------------------------------------------------------------------------------------------------------------------------------------------------------------------------------------------------------------------------------|
|                              | very good, so I feel very good (Participant 3, 54).                                                                                                                                                                                                    |
|                              | I feel that the doctors, nurses and family members are very concerned about me. Everyone has a very good attitude. It is not easy for everyone to work and live. I have a lot of spiritual support. I am very grateful (Participant 11, 30).           |
| Hope                         | My family is pampering me now, which is pretty good. My husband said that I have been optimistic in the past years. Well, I just want to be stronger anyway, everything will definitely get better (Participant 2, 67).                                |
| Humor                        | But sometimes when I chat with patients in the department, no matter what I say, everyone is very happy. It feels like I am everyone's pistachio. But I think I am more cute than humorous (Participant 5, 52).                                        |
| Religiousness & Spirituality | Just to get better soon, and live a few more years, I have been chanting and believing in Buddha. My child also said that I had changed but felt that my mentality was much better and calmer after relying on faith and religion (Participant 7, 65). |

### Theme 1: Cognitive strengths

Cognitive strengths reflect wisdom, knowledge, exploration, openness and knowledge-seeking [7]. This theme involves five strengths: creativity, curiosity, judgment and open-mindedness, love of learning, and perspective. These subthemes reflect the manifestations of cognitive strengths based on wisdom, openness and knowledge. In response to unexpected situations or unfamiliar problems, the participants usually gave wise solutions. Some participants aided their recovery by reading about treatment and nursing skills, which also demonstrated their love of learning. Love of learning refers to cognitive engagement, mastering new skills and increasing existing knowledge [35]. Creativity refers to original and adaptive thought or behaviour. The narratives of the participants also reflected how they found new ways to deal with the familial and social problems encountered while receiving treatment.

### Theme 2: Emotional strengths

1  
2  
3  
4 When the participants talked about their lives after breast cancer and the  
5  
6 inherent difficulties they faced, they also showed the emotional strengths of courage,  
7  
8 perseverance, honesty and enthusiasm. This theme involves four strengths: bravery,  
9  
10 perseverance, honesty and zest. These subthemes reflect the Chinese manifestations of  
11  
12 emotional strengths. Being brave means not shrinking from challenges [36]. For  
13  
14 example, some participants said that they dared to face physical damage after breast  
15  
16 surgery and hair loss after chemotherapy. They felt that living was more important  
17  
18 than these considerations. Bravery enabled self-determination and helped them  
19  
20 actively persevere. Other participants said frankly that they told their family members  
21  
22 about their fear of death, while emphasising that their family members remained  
23  
24 encouraging and supportive.  
25  
26  
27  
28  
29  
30  
31  
32  
33  
34

### 35 **Theme 3: Interpersonal strengths**

36  
37 Interpersonal strengths clearly reflect humanity and justice. They include love,  
38  
39 kindness, social intelligence and developing relationships and caring for other people.  
40  
41 This theme involves three strengths: capacity to love and be loved, kindness and  
42  
43 social intelligence. Social intelligence is the awareness of the motives and feelings of  
44  
45 oneself and others, and knowing how to adapt to different social situations [36]. This  
46  
47 was demonstrated by many participants, especially patients who got along well with  
48  
49 roommates and nurses during hospitalisation.  
50  
51  
52  
53  
54  
55  
56  
57

### 58 **Theme 4: Civic and community strengths**

1  
2  
3  
4 Civic strengths are considered an integral part of a healthy community; they  
5  
6 include teamwork, fairness and leadership. In our study, we also identified a fourth  
7  
8 civic strength: selflessness. Teamwork refers to social responsibility and working  
9  
10 collaboratively as a member of a team or group. Fairness involves treating people the  
11  
12 same according to principles of justice. Selflessness refers to dedication, rather than  
13  
14 self-interest. This is a distinct cultural strength proposed by the Chinese participants  
15  
16 in the study. Participants thought this was one of their strengths, which helped them  
17  
18 obtain the respect of others and society.  
19  
20  
21  
22  
23  
24  
25  
26

### 27 **Theme 5: Restraint and temperance strengths**

28  
29  
30 Restraint and temperance strengths encompass forgiveness, modesty, prudence  
31  
32 and self-regulation. In our study, this theme also contains a fifth strength: pragmatism.  
33  
34 Modesty means an unwillingness to praise oneself and show off one's qualities or  
35  
36 achievements [2,36]. In all of our interviews, when we first mentioned expressing  
37  
38 personal strengths, the participants often avoided talking and reflected that humility is  
39  
40 a common occurrence. The participants were reluctant to talk about their own  
41  
42 achievements and character strengths. They thought that talking about this would  
43  
44 violate their culture's respect for humility, and they were embarrassed. In contrast,  
45  
46 they were more willing to admit that they had many shortcomings. Chinese Confucian  
47  
48 view has evolved into the view that humility makes people grow, while complacency  
49  
50 and pride make people degenerate [37]. Pragmatism is related to facts or practical  
51  
52 matters, and usually excludes intellectual or artistic matters. Pragmatism is a new  
53  
54  
55  
56  
57  
58  
59  
60



1  
2  
3  
4 emergent subtheme, which means practicality rather than idealism. This is another  
5  
6 distinctly Chinese strength that may be related to China's long period of construction  
7  
8 and development.  
9  
10

### 11 12 13 14 **Theme 6: Transcendence strengths**

15  
16  
17 Transcendence strengths provide meaning in life and exceed the limits of  
18  
19 ordinary experience. This theme contains five strengths: appreciation of beauty and  
20  
21 excellence, gratitude, hope, humour, and religiousness and spirituality. Although the  
22  
23 participants mentioned that their spirituality was related to Buddhism, it was more  
24  
25 about how they gained strength from their belief system and cultural values. These  
26  
27 strengths gave the participants guidelines, made them feel special, and enabled them  
28  
29 to cope with the negative things in their life and treatment. Gratitude and spirituality  
30  
31 were common strengths across all of the interviews. The participants mentioned that  
32  
33 they tended to gain comfort from these strengths after their diagnosis, despite their  
34  
35 physical weakness and psychological dysfunction.  
36  
37  
38  
39  
40  
41  
42  
43  
44  
45

### 46 **Positive outcomes and expectations of identifying and using character strengths**

47  
48 Several subjective positive outcomes were frequently addressed by the  
49  
50 participants in connection with the awareness of strengths. They included improved  
51  
52 self-awareness, personal confidence and self-esteem, increased happiness, optimism, a  
53  
54 greater sense of meaning in life, improved well-being and decreased distress. Better  
55  
56 well-being and a sense of meaning were the most frequently addressed benefits  
57  
58  
59  
60



(mentioned eleven times). In addition, in reference to these outcomes, most of the related strengths were those that involved reconnecting with people, such as gratitude, kindness, selflessness and love. The most frequently quoted proverb was ‘good people get rewards’ (mentioned eight times); that is, they felt that if they did good deeds for others, their health and life would improve.

## Discussion

The patients with breast cancer in this study described a large repertoire of character strengths they used or wished for during survivorship. In line with previous studies [2], most of the themes and sub-themes coded in this study were in line with VIA. Two more strengths — selflessness and pragmatism — emerged. Cultural values and culture (e.g., collectivism, importance of family, Confucianism and Buddhism) helped structure the participants strengths and influenced their descriptions.

In our study, the participants with breast cancer did not differ from the healthy individuals studied in the previous literature in terms of transcendence strengths (appreciation of beauty and excellence, religiousness, spirituality) and cognitive strengths (wisdom and knowledge). These are potential characteristics of breast cancer patients that they can use when experiencing life and treatment events. These results are reflected in traditional palliative care or existing psychosocial programmes for breast cancer patients, in which patients are taught to express appropriate emotion and improve their problem-solving skills as part of the recovery process [38]. The

1  
2  
3  
4 breast cancer patients in this study experienced a similar appreciation of beauty. They  
5  
6 appreciated excellence in all areas of life (art, nature and daily life) and in other  
7  
8 people. They had coherent beliefs about truth and life independent of their disease and  
9  
10 treatment.  
11  
12

13  
14 The experiences of emotional strengths, interpersonal strengths, civic and  
15  
16 community strengths, restrained and temperance strengths, and other types of strength  
17  
18 are significantly influenced by breast cancer and cultural values. Kindness and  
19  
20 gratitude are associated with positive affect [36], and were the character strengths  
21  
22 most frequently expressed by the participants. Studies have consistently shown that  
23  
24 strengths of the heart, such as kindness and gratitude, are more strongly associated  
25  
26 with well-being than individual strengths, such as creativity and leadership. The other  
27  
28 character strengths most frequently mentioned by the participants were love,  
29  
30 selflessness, honesty, modesty and hope. This coincides with the perception of  
31  
32 character in Chinese culture. Chinese people have inherited the Confucian emphasis  
33  
34 on the cultivation of good character traits, like benevolence and kindness [39].  
35  
36 Kindness and fairness are the important characteristics in the traditional culture of  
37  
38 benevolence and righteousness. Some of the participants emphasised that their belief  
39  
40 in Buddhism and religious practice made them feel much calmer during their breast  
41  
42 cancer episode, and they felt that their spirit and beliefs gave them hope and gave life  
43  
44 new meaning. This finding also suggests that spirituality/religiousness is related to  
45  
46 meaning and goals in life [40].  
47  
48  
49  
50  
51  
52  
53  
54  
55  
56  
57  
58  
59  
60

1  
2  
3  
4 Concepts also need to be understood within the prevailing sociocultural and  
5  
6 political context [41]. The two newly emerging strengths are influenced by  
7  
8 contemporary culture and policies. Selflessness refers to the characteristic Chinese  
9  
10 concept that people should not be self-interested, be proud to serve the collective and  
11  
12 ashamed to deviate from it, and strive for unity. Pragmatism emphasises beliefs that  
13  
14 practice will lead to true knowledge and wealth; it has been strengthened by modern  
15  
16 development policies.  
17  
18  
19  
20  
21

22 Throughout the research process, the participants had difficulty identifying  
23  
24 and talking about their strengths. This may demonstrate their strength of modesty.  
25  
26 Such humbleness could be influenced by Chinese Confucian culture [39]. Other  
27  
28 studies have also identified this barrier to the expression of strengths [2]. The  
29  
30 challenges encountered by our participants in transforming their strengths into  
31  
32 descriptive language may reflect their need for more opportunities for self-awareness  
33  
34 and self-reflection. Another possible explanation is the conceptual overlap between  
35  
36 strengths and cultural values. This overlap may lead people to underestimate their  
37  
38 capabilities [42] and their interpersonal and cognitive strengths. The participants also  
39  
40 highlighted that they wanted their character strengths to be more noticed, appreciated  
41  
42 and encouraged by others, such as family members and medical caregivers. Chinese  
43  
44 culture emphasises the role of the family. The affairs of family members are usually  
45  
46 determined by the entire family [43]. In such a collectivist environment, individual  
47  
48 character is often not valued. Interaction with physicians and nurses was also  
49  
50 highlighted. The women's high respect for physicians and reliance on nurses led them  
51  
52  
53  
54  
55  
56  
57  
58  
59  
60

1  
2  
3  
4 to attach great importance to communication. The awareness and praise of personal  
5  
6 character strengths by family members and medical caregivers enhanced their sense  
7  
8 of self-esteem and well-being while living with breast cancer. One previous study  
9  
10 similarly demonstrated that overcoming blindness to strengths could improve an  
11  
12 individual's self-efficacy and self-confidence, which in turn could affect their well-  
13  
14 being [44].  
15  
16  
17  
18  
19  
20  
21

### 22 **Theoretical considerations and implications**

23  
24 Although there are other current theories and frameworks based on strengths,  
25  
26 they have a number of limitations; in contrast, VIA has achieved a wide range of  
27  
28 applications. Roux, Dingley and Bush (2002) introduced the theory of inner strength  
29  
30 and Lundman et al. (2010) offered a conceptual model of four core dimensions  
31  
32 [45,46]. However, most related studies have been carried out on women. Expressions  
33  
34 of inner strength at different ages and in different life circumstances take different  
35  
36 forms [41]. Janssen, Van Regenmortel, and Abma (2011) identified sources of  
37  
38 strength in three domains, individual, interactional and contextual, but did not define  
39  
40 the strengths [47]. In a similar Chinese study, Duan and Ho (2017) used the VIA  
41  
42 theory of character strengths, but their three-dimensional model of strengths  
43  
44 (temperance, intellectual, and interpersonal) was generalised to the non-clinical  
45  
46 community [48].  
47  
48  
49  
50  
51  
52  
53  
54

55  
56 Our findings among breast cancer patients support the theoretical  
57  
58 understanding of strengths [7]. Our study examined the viability of the popular VIA  
59  
60

1  
2  
3  
4 theory among a specific population in the Chinese context. The findings also extend  
5  
6 the theoretical and empirical evidence for the VIA model to the population of patients  
7  
8 with breast cancer in China. This compatibility and integration of strengths theory and  
9  
10 traditional values may make the VIA more than a conceptual tool. Although the  
11  
12 original VIA classification framework applied to a range of religions, philosophies  
13  
14 and cultures, the situational themes of strengths could be expressed in different life  
15  
16 domains or specific contexts/situations [48]. In our study, the patients with breast  
17  
18 cancer were in a special context with various challenges. It is important to note that  
19  
20 the VIA is still being refined, so the list of strengths may change accordingly [49].  
21  
22 Therefore, further research is needed to test the VIA among breast cancer patients  
23  
24 with various characteristics.  
25  
26  
27  
28  
29  
30  
31  
32  
33  
34

### 35 **Clinical implications**

36  
37 It is important to emphasise the psychological strengths of breast cancer  
38  
39 patients and their abilities related to their personal traits in a kind of individual-  
40  
41 oriented salutogenic approach [35]. Strengths that are associated with positive  
42  
43 outcomes are those that link people together, such as gratitude, kindness, selflessness  
44  
45 and love. However, for nurses, psychological counsellors and other professionals,  
46  
47 further research is needed to optimise the description of strengths and evaluation for  
48  
49 patients in China.  
50  
51  
52  
53  
54

55  
56 To our knowledge, this is the first study to describe Chinese breast cancer  
57  
58 patients' perceptions and experiences of character strengths. The findings indicate that  
59  
60

1  
2  
3  
4 character strength is a crucial psychological resource during patients' survivorship.  
5  
6  
7 Further research is needed to learn more about the strengths of a larger population of  
8  
9  
10 breast cancer patients with different backgrounds. In addition, strength identification  
11  
12 and knowledge are only prerequisites. Using strengths is what leads to valuable  
13  
14 outcomes. It is also necessary to explore strategies and interventions to help breast  
15  
16 cancer patients mobilise their personal strengths. Strength-based practices adapted to  
17  
18 Chinese breast cancer patients should be developed in clinical programmes.  
19  
20  
21  
22  
23  
24

### 25 **Study limitations**

26  
27 Although we have provided some important findings on the strengths of breast  
28  
29 cancer patients, this study has several limitations. First, the generalisability of the  
30  
31 results is limited. The number of participants was small. The study hospital was a  
32  
33 provincial hospital that admitted patients from central China. Second, the findings  
34  
35 were based on the statements of the participants. Additional studies are needed to  
36  
37 explore the generalisability of our findings. Another limitation may be the definition  
38  
39 of character strengths. This study used the core descriptive elements provided by  
40  
41 Peterson and Seligman (2004) [12]. Making use of a broader study of strengths could  
42  
43 overcome this limitation, especially for those who are less familiar with character  
44  
45 strengths and those who have difficulty in describing them. Replicating the study  
46  
47 might increase its validity by allowing participants more time to become familiar with  
48  
49 strengths and to speculate about expressions based on their individual experiences.  
50  
51  
52  
53  
54  
55  
56  
57  
58  
59  
60

## Conclusion

This study revealed the obstacles encountered by breast cancer patients in describing their own strengths but proved that it is possible to uncover their character strengths. An evidence base is needed to optimise breast cancer patients' awareness of their strengths. Breast cancer patients' perceptions of character strengths are affected by various issues related to personal experience with breast cancer and cultural values. The participants in this study experienced better well-being and a greater sense of purpose in life due to character strengths that reconnected people. This study highlights the importance of cultural values to the construct of character strengths. Finally, this study established a theoretically sound model for understanding and addressing strengths in Chinese clinical breast cancer care with clear, culturally specific descriptions.

**Acknowledgements** The authors are grateful to all the participants who generously gave their time to take part in an interview for this study and shared their experiences.

**Contributors** YTT contributed to the conception and design, data collection by conducting the interviews, analysis and interpretation, drafted and reviewed the manuscript. CC contributed to the conception and design, interpretation and reviewed the manuscript. PVB contributed to the analysis, interpretation and reviewed the manuscript. CKM and LMZ contributed to the conception and design and reviewed the manuscript. All authors have given final approval of the version to be published and agree to be accountable for all aspects of the work in ensuring that questions related to the accuracy or integrity of any part of the work are appropriately investigated and resolved. YTT is responsible for the overall content as guarantor.

1  
2  
3  
4 **Funding** This research did not receive any specific grant from funding agencies in the  
5 public, commercial or not-for-profit sectors.  
6  
7

8 **Competing interests** The authors declare they have no conflict of interest.  
9

10 **Patient and public involvement** Patients and/or the public were not involved in  
11 the design, conduct, reporting or dissemination plans of this research.  
12  
13

14 **Patient consent for publication** A digital code was used to refer to each participant  
15 to maintain anonymity. Patient consent for publication Consent obtained directly from  
16 patient(s).  
17  
18

19 **Ethics approval** All procedures were in accordance with the guidelines of the  
20 Research Ethics Committee of the University (CUHK Approval number: SBREC 19-  
21 114) and Joint Chinese University of Hong Kong–New Territories East Cluster  
22 Clinical Research Ethics Committee, reference number: 2019.429. This study was in  
23 accordance with the ethical standards of the institutional research committee and with  
24 the 1964 Helsinki declaration and its later amendments.  
25  
26  
27  
28  
29  
30  
31  
32  
33

34 **Provenance and peer review** Not commissioned; externally peer reviewed.  
35  
36

37 **Data availability statement** Data are available on reasonable request.  
38  
39  
40  
41  
42  
43  
44  
45  
46  
47  
48  
49  
50  
51  
52  
53  
54  
55  
56  
57  
58  
59  
60



## References

- 1 Moyle W, Parker D, Bramble M. *Care of older adults. A strengths-based approach*. Sydney: : Cambridge University Press 2014.
- 2 Waterworth S, Raphael D, Gott M, *et al*. Uncovering strengths within community dwelling older adults: What does it mean for health care practice? *Heal Soc Care Community* 2019;:1–9. doi:10.1111/hsc.12924
- 3 Gottlieb LN, Gottlieb B. Strengths-Based Nursing: A Process for Implementing a Philosophy Into Practice. *J Fam Nurs* 2017;**23**:319–40. doi:10.1177/1074840717717731
- 4 Duan W, Bu H. Development and initial validation of a short three-dimensional inventory of character strengths. *Qual Life Res* 2017;**26**:2519–31. doi:10.1007/s11136-017-1579-4
- 5 Jeste D V., Palmer BW, Boardman S, *et al*. Integrating Positive Psychiatry Into Clinical Practice. In: *Positive Psychiatry*. 2015. doi:10.1176/appi.books.9781615370818.dj12
- 6 McGrath RE, Hall-Simmonds A, Goldberg LR. Are Measures of Character and Personality Distinct? Evidence From Observed-Score and True-Score Analyses. *Assessment* 2020;**27**:117–35. doi:10.1177/1073191117738047
- 7 Peterson C, Seligman ME. *Character strengths and virtues A handbook and classification*. New York: : Oxford University Press 2004.
- 8 Pieters HC. ‘i’m Still Here’: Resilience among older survivors of breast cancer. *Cancer Nurs* 2016;**39**:E20–8. doi:10.1097/NCC.0000000000000248

- 1  
2  
3  
4 9 Rotegard AK, Fagermoen MS, Ruland CM. Cancer patients' experiences of  
5  
6 their personal strengths through illness and recovery. *Cancer Nurs* 2012;**35**:8–  
7  
8 17. doi:10.1097/NCC.0b013e3182116497  
9  
10  
11 10 Niemiec R, Rashid T, Spinella M. Strong Mindfulness: Integrating Mindfulness  
12  
13 and Character Strengths. *J Ment Heal Couns* 2015;**34**:240–53.  
14  
15  
16 doi:10.17744/mehc.34.3.34p6328x2v204v21  
17  
18  
19 11 Fang SY, Lin YC, Chen TC, *et al.* Impact of marital coping on the relationship  
20  
21 between body image and sexuality among breast cancer survivors. *Support*  
22  
23 *Care Cancer* 2015;**23**:2551–9. doi:10.1007/s00520-015-2612-1  
24  
25  
26  
27 12 Seligman M. Flourish: a visionary new understanding of happiness and well-  
28  
29 being. In: *Choice Reviews Online*. 2011. 48-7217-48–7217.  
30  
31  
32 doi:10.5860/choice.48-7217  
33  
34  
35 13 Shimai S, Otake K, Park N, *et al.* Convergence of character strengths in  
36  
37 American and Japanese young adults. *J Happiness Stud* 2006;**7**:311–22.  
38  
39  
40 doi:10.1007/s10902-005-3647-7  
41  
42  
43 14 Baumann D, Ruch W, Margelisch K, *et al.* Character Strengths and Life  
44  
45 Satisfaction in Later Life: an Analysis of Different Living Conditions. *Appl Res*  
46  
47 *Qual Life* Published Online First: 2019. doi:10.1007/s11482-018-9689-x  
48  
49  
50 15 Chan CWH, Chang AM. Stress associated with tasks for family caregivers of  
51  
52 patients with cancer in Hong Kong. *J Adv Nurs* 1999;**29**:484–9.  
53  
54  
55  
56 doi:10.1097/00002820-199908000-00002  
57  
58  
59  
60

- 1  
2  
3  
4 16 So WKW, Choi KC, Chen JMT, *et al.* Quality of life in head and neck cancer  
5  
6 survivors at 1 year after treatment: the mediating role of unmet supportive care  
7  
8 needs. *Support Care Cancer* 2014;**22**:2917–26. doi:10.1007/s00520-014-2278-  
9  
10 0  
11  
12  
13  
14 17 Wagner L, Ruch W. Good character at school: Positive classroom behavior  
15  
16 mediates the link between character strengths and school achievement. *Front*  
17  
18 *Psychol* 2015;**6**:1-13. doi:10.3389/fpsyg.2015.00610  
19  
20  
21  
22 18 Lim YJ. Relations between virtues and positive mental health in a Korean  
23  
24 population: A Multiple Indicators Multiple Causes (MIMIC) model approach.  
25  
26 *Int J Psychol* 2015;**50**:272–8. doi:10.1002/ijop.12096  
27  
28  
29  
30 19 McGrath RE. Character strengths in 75 nations: An update. *J Posit Psychol*  
31  
32 2015;**10**:41–52. doi:10.1080/17439760.2014.888580  
33  
34  
35 20 Hanks RA, Rapport LJ, Waldron-Perrine B, *et al.* Role of character strengths in  
36  
37 outcome after mild complicated to severe traumatic brain injury: A positive  
38  
39 psychology study. *Arch Phys Med Rehabil* 2014;**95**:2096–102.  
40  
41 doi:10.1016/j.apmr.2014.06.017  
42  
43  
44  
45 21 Macaskill A. Review of Positive Psychology Applications in Clinical Medical  
46  
47 Populations. *Healthcare* 2016;**4**:66. doi:10.3390/healthcare4030066  
48  
49  
50  
51 22 Yan T, Chan CWH, Chow KM, *et al.* A systematic review of the effects of  
52  
53 character strengths-based intervention on the psychological well-being of  
54  
55 patients suffering from chronic illnesses. *J Adv Nurs* 2020;**76**:1567–80.  
56  
57 doi:10.1111/jan.14356  
58  
59  
60

- 1  
2  
3  
4 23 Ruch W, Proyer RT. Mapping strengths into virtues: The relation of the 24  
5  
6 VIA-strengths to six ubiquitous virtues. *Front Psychol* 2015;**6**:1–12.  
7  
8  
9 doi:10.3389/fpsyg.2015.00460  
10  
11  
12 24 Markus HR, Kitayama S. Culture and the self: Implications for cognition,  
13  
14 emotion, and motivation. *Psychol Rev* 1991;**98**:224–53. doi:10.1037/0033-  
15  
16 295X.98.2.224  
17  
18  
19 25 Chan CWH, Law BMH, So WKW, *et al.* Novel strategies on personalized  
20  
21 medicine for breast cancer treatment: An update. *Int J Mol Sci* 2017;**18**:2423.  
22  
23 doi:10.3390/ijms18112423  
24  
25  
26  
27 26 O’Brien BC, Harris IB, Beckman TJ, *et al.* Standards for reporting qualitative  
28  
29 research: A synthesis of recommendations. *Acad Med* 2014;**89**:1245–51.  
30  
31 doi:10.1097/ACM.0000000000000388  
32  
33  
34  
35 27 Lusardi P. Qualitative Research in Nursing: Advancing the Humanistic  
36  
37 Imperative. *Nurs Res* 1996;**45**:62. doi:10.1097/00006199-199601000-00014  
38  
39  
40 28 Henderson PD, Gore S V., Davis BL, *et al.* African American women coping  
41  
42 with breast cancer: a qualitative analysis. *Oncol Nurs Forum* 2003;**30**:641–7.  
43  
44 doi:10.1188/03.ONF.641-647  
45  
46  
47  
48 29 Pitre NY, Myrick F. A view of nursing epistemology through reciprocal  
49  
50 interdependence: towards a reflexive way of knowing. *Nurs Philos* 2007;**8**:73–  
51  
52 84. doi:10.1111/j.1466-769X.2007.00298.x  
53  
54  
55  
56 30 Palinkas LA, Horwitz SM, Green CA, *et al.* Purposeful Sampling for  
57  
58 Qualitative Data Collection and Analysis in Mixed Method Implementation  
59  
60

- 1  
2  
3  
4 Research. *Adm Policy Ment Heal Ment Heal Serv Res* 2015;**42**:533–44.  
5  
6 doi:10.1007/s10488-013-0528-y  
7  
8
- 9 31 Ritchie J, Spencer L. Qualitative data analysis for applied policy research. In:  
10  
11 *Analyzing qualitative data*. 2010. 173–94.  
12  
13 doi:10.4324/9780203413081\_chapter\_9  
14  
15
- 16 32 Barasteh S, Rassouli M, Parandeh A, *et al*. Palliative care in the health system  
17  
18 of Iran: A review of the present status and the future challenges. *Asian Pacific*  
19  
20 *J Cancer Prev* 2020;**21**:845–51. doi:10.31557/APJCP.2020.21.3.845  
21  
22  
23
- 24 33 Fox DE, Quinn RR, James MT, *et al*. Social Support in the Peritoneal Dialysis  
25  
26 Experience: A Qualitative Descriptive Study. *Can J Kidney Heal Dis* 2020;**7**.  
27  
28 doi:10.1177/2054358120946572  
29  
30  
31
- 32 34 Sandelowski M. The problem of rigor in qualitative research. *ANS Adv Nurs*  
33  
34 *Sci* 1986;**8**:27–37. doi:10.1097/00012272-198604000-00005  
35  
36  
37
- 38 35 Guse T, Hudson D. Psychological strengths and posttraumatic growth in the  
39  
40 successful reintegration of South African ex-offenders. *Int J Offender Ther*  
41  
42 *Comp Criminol* 2014;**58**:1449–65. doi:10.1177/0306624X13502299  
43  
44  
45
- 46 36 Niemiec RM. *Character strengths interventions. A field guide for practitioners*.  
47  
48 Boston, MA: : Hogrefe Publishing 2018.  
49  
50
- 51 37 Li J. Humility in learning: A Confucian perspective. *J Moral Educ*  
52  
53 2016;**45**:147–65. doi:10.1080/03057240.2016.1168736  
54  
55
- 56 38 Spiegel D. Psychosocial aspects of breast cancer treatment. *Semin Oncol*  
57  
58 1997;**24**:S1-36-S1-47.  
59  
60

- 1  
2  
3  
4 39 Guo Z. Chinese Confucian culture and the medical ethical tradition. *J Med*  
5  
6 *Ethics* 1995;**21**:239–46. doi:10.1136/jme.21.4.239  
7  
8  
9 40 Moale AC, Rajasekhara S, Ueng W, *et al.* Educational intervention enhances  
10  
11 clinician awareness of Christian, Jewish, and Islamic teachings around end-of-  
12  
13 life care. *J Palliat Med* 2019;**22**:62–70. doi:10.1089/jpm.2018.0077  
14  
15  
16 41 Lundman B, Aléx L, Jonsén E, *et al.* Inner strength-A theoretical analysis of  
17  
18 salutogenic concepts. *Int J Nurs Stud* 2010;**47**:251–60.  
19  
20 doi:10.1016/j.ijnurstu.2009.05.020  
21  
22  
23 42 Tang X, Li Y, Duan W, *et al.* Character strengths lead to satisfactory  
24  
25 educational outcomes through strength use: A longitudinal analysis. *Front*  
26  
27 *Psychol* 2019;**10**:1-9. doi:10.3389/fpsyg.2019.01829  
28  
29  
30 43 Ling M, Wang X, Ma Y, *et al.* A Review of the Current State of Hospice Care  
31  
32 in China. *Curr Oncol Rep* 2020;**22**:1–7. doi:10.1007/s11912-020-00959-y  
33  
34  
35 44 Waters LE. Strength-based parenting and life satisfaction in teenagers. *Adv Soc*  
36  
37 *Sci Res J* 2015;**2**:158–173. doi:10.14738/assrj.211.1551  
38  
39  
40 45 Roux G, Dingley C, Bush H. Inner Strength in Women: Metasynthesis of  
41  
42 Qualitative Findings in Theory Development. *J Theory Constr Test* 2002;**6**:86.  
43  
44  
45 46 Janssen BM, Van Regenmortel T, Abma TA. Identifying sources of strength:  
46  
47 Resilience from the perspective of older people receiving long-term community  
48  
49 care. *Eur J Ageing* 2011;**8**:145–56. doi:10.1007/s10433-011-0190-8  
50  
51  
52  
53  
54  
55  
56  
57  
58  
59  
60

- 1  
2  
3  
4 47 Duan W, Ho SMY. Three-Dimensional Model of Strengths: Examination of  
5  
6 Invariance Across Gender, Age, Education Levels, and Marriage Status.  
7  
8  
9 *Community Ment Health J* 2017;**53**:233–40. doi:10.1007/s10597-016-0038-y  
10  
11 48 Niemiec RM. Six Functions of Character Strengths for Thriving at Times of  
12  
13 Adversity and Opportunity: a Theoretical Perspective. *Appl Res Qual Life*  
14  
15 2020;**15**:551–72. doi:10.1007/s11482-018-9692-2  
16  
17  
18  
19 49 Park N, Peterson C, Seligman MEP. Strengths of character and well-being. *J*  
20  
21 *Soc Clin Psychol* 2004;**23**:603–19. doi:10.1521/jscp.23.5.603.50748  
22  
23  
24  
25  
26  
27  
28  
29  
30  
31  
32  
33  
34  
35  
36  
37  
38  
39  
40  
41  
42  
43  
44  
45  
46  
47  
48  
49  
50  
51  
52  
53  
54  
55  
56  
57  
58  
59  
60

Standards for Reporting Qualitative Research (SRQR)—checklist of items that should be included in reports of Qualitative studies

|                                              | Item No | Recommendation                                                                                                                                                                                                                                                                                                                                   | Page No |
|----------------------------------------------|---------|--------------------------------------------------------------------------------------------------------------------------------------------------------------------------------------------------------------------------------------------------------------------------------------------------------------------------------------------------|---------|
| <b>Title and abstract</b>                    |         |                                                                                                                                                                                                                                                                                                                                                  |         |
| <b>Title</b>                                 | 1       | Concise description of the nature and topic of the study Identifying the study as qualitative or indicating the approach (e.g., ethnography, grounded theory) or data collection methods (e.g., interview, focus group) is recommended                                                                                                           | 1       |
| <b>Abstract</b>                              | 2       | Summary of key elements of the study using the abstract format of the intended publication; typically includes background, purpose, methods, results, and conclusions                                                                                                                                                                            | 2       |
| <b>Introduction</b>                          |         |                                                                                                                                                                                                                                                                                                                                                  |         |
| Problem formulation                          | 3       | Description and significance of the problem/phenomenon studied; review of relevant theory and empirical work; problem statement                                                                                                                                                                                                                  | 4       |
| Purpose or research question                 | 4       | Purpose of the study and specific objectives or questions                                                                                                                                                                                                                                                                                        | 6       |
| <b>Methods</b>                               |         |                                                                                                                                                                                                                                                                                                                                                  |         |
| Qualitative approach and research paradigm   | 5       | Qualitative approach (e.g., ethnography, grounded theory, case study, phenomenology, narrative research) and guiding theory if appropriate; identifying the research paradigm (e.g., postpositivist, constructivist/interpretivist) is also recommended; rationale <sup>b</sup>                                                                  | 7       |
| Researcher characteristics and reflexivity   | 6       | Researchers' characteristics that may influence the research, including personal attributes, qualifications/experience, relationship with participants, assumptions, and/or presuppositions; potential or actual interaction between researchers' characteristics and the research questions, approach, methods, results, and/or transferability | 8       |
| Context                                      | 7       | Setting/site and salient contextual factors; rationale <sup>b</sup>                                                                                                                                                                                                                                                                              | 9       |
| Sampling strategy                            | 8       | How and why research participants, documents, or events were selected; criteria for deciding when no further sampling was necessary (e.g., sampling saturation); rationale <sup>b</sup>                                                                                                                                                          | 7       |
| Ethical issues pertaining to human subjects  | 9       | Documentation of approval by an appropriate ethics review board and participant consent, or explanation for lack thereof; other confidentiality and data security issues                                                                                                                                                                         | 12      |
| Data collection methods                      | 10      | Types of data collected; details of data collection procedures including (as appropriate) start and stop dates of data collection and analysis, iterative process, triangulation of sources/methods, and modification of procedures in response to evolving study findings; rationale <sup>b</sup>                                               | 8       |
| Data collection instruments and technologies | 11      | Description of instruments (e.g., interview guides, questionnaires) and devices (e.g., audio recorders) used for data collection; if/how the instrument(s) changed over the course of the study                                                                                                                                                  | 9       |
| Units of study                               | 12      | Number and relevant characteristics of participants, documents, or events included in the study; level of participation (could be reported in results)                                                                                                                                                                                           | 13      |
| Data processing                              | 13      | Methods for processing data prior to and during analysis, including transcription, data entry, data management and security, verification of data integrity, data coding, and anonymization/deidentification of excerpts                                                                                                                         | 9       |



|                                                                                              |    |                                                                                                                                                                                                                                                                                                       |       |
|----------------------------------------------------------------------------------------------|----|-------------------------------------------------------------------------------------------------------------------------------------------------------------------------------------------------------------------------------------------------------------------------------------------------------|-------|
| Data analysis                                                                                | 14 | Process by which inferences, themes, etc., were identified and developed, including the researchers involved in data analysis; usually references a specific paradigm or approach; rationale <sup>b</sup>                                                                                             | 10    |
| Techniques to enhance trustworthiness                                                        | 15 | Techniques to enhance trustworthiness and credibility of data analysis (e.g., member checking, audit trail, triangulation); rationale <sup>b</sup>                                                                                                                                                    | 12    |
| (Table continues)                                                                            |    |                                                                                                                                                                                                                                                                                                       |       |
| <b>Results /findings</b>                                                                     |    |                                                                                                                                                                                                                                                                                                       |       |
| Synthesis and interpretation                                                                 | 16 | Main findings (e.g., interpretations, inferences, and themes); might include development of a theory or model, or integration with prior research or theory                                                                                                                                           | 14-22 |
| Links to empirical data                                                                      | 17 | Evidence (e.g., quotes, field notes, text excerpts, photographs) to substantiate analytic findings                                                                                                                                                                                                    | 16-18 |
| <b>Discussion</b>                                                                            |    |                                                                                                                                                                                                                                                                                                       |       |
| Integration with prior work, implications, transferability, and contribution(s) to the field | 18 | Short summary of main findings; explanation of how findings and conclusions connect to, support, elaborate on, or challenge conclusions of earlier scholarship; discussion of scope of application/generalizability; identification of unique contribution(s) to scholarship in a discipline or field | 22-25 |
| Limitations                                                                                  | 19 | Trustworthiness and limitations of findings                                                                                                                                                                                                                                                           | 27    |
| <b>Other</b>                                                                                 |    |                                                                                                                                                                                                                                                                                                       |       |
| Conflicts of interest                                                                        | 20 | Potential sources of influence or perceived influence on study conduct and conclusions; how these were managed                                                                                                                                                                                        | 29    |
| Funding                                                                                      | 21 | Sources of funding and other support; role of funders in data collection, interpretation, and reporting                                                                                                                                                                                               | 29    |

<sup>a</sup>The authors created the SRQR by searching the literature to identify guidelines, reporting standards, and critical appraisal criteria for qualitative research; reviewing the reference lists of retrieved sources; and contacting experts to gain feedback. The SRQR aims to improve the transparency of all aspects of qualitative research by providing clear standards for reporting qualitative research.

<sup>b</sup>The rationale should briefly discuss the justification for choosing that theory, approach, method, or technique rather than other options available, the assumptions and limitations implicit in those choices, and how those choices influence study conclusions and transferability. As appropriate, the rationale for several items might be discussed together.

**Note:** BC O'Brien, Harris, I. B. , Beckman, T. J. , Reed, D. A. , & Cook, D. A. . (2014). Standards for reporting qualitative research: a synthesis of recommendations. *Academic Medicine*, 89(9), 1245-1251.

# BMJ Open

## Experiences and perception of character strengths among patients with breast cancer in China: A qualitative study

|                                 |                                                                                                                                                                                                                                                                                        |
|---------------------------------|----------------------------------------------------------------------------------------------------------------------------------------------------------------------------------------------------------------------------------------------------------------------------------------|
| Journal:                        | <i>BMJ Open</i>                                                                                                                                                                                                                                                                        |
| Manuscript ID                   | bmjopen-2022-061994.R2                                                                                                                                                                                                                                                                 |
| Article Type:                   | Original research                                                                                                                                                                                                                                                                      |
| Date Submitted by the Author:   | 25-Sep-2022                                                                                                                                                                                                                                                                            |
| Complete List of Authors:       | Yan, Tingting; Peking University, School of Nursing<br>Chan, Carmen Wing Han; The Chinese University of Hong Kong, The Nethersole School of Nursing<br>Chow, Ka; Chinese University of Hong Kong, The Nethersole School of Nursing<br>Li, Mingzi; Peking University, School of Nursing |
| <b>Primary Subject Heading</b>: | Palliative care                                                                                                                                                                                                                                                                        |
| Secondary Subject Heading:      | Mental health, Qualitative research                                                                                                                                                                                                                                                    |
| Keywords:                       | Breast tumours < ONCOLOGY, Adult palliative care < PALLIATIVE CARE, PSYCHIATRY, QUALITATIVE RESEARCH, Adult psychiatry < PSYCHIATRY                                                                                                                                                    |
|                                 |                                                                                                                                                                                                                                                                                        |

SCHOLARONE™  
Manuscripts



I, the Submitting Author has the right to grant and does grant on behalf of all authors of the Work (as defined in the below author licence), an exclusive licence and/or a non-exclusive licence for contributions from authors who are: i) UK Crown employees; ii) where BMJ has agreed a CC-BY licence shall apply, and/or iii) in accordance with the terms applicable for US Federal Government officers or employees acting as part of their official duties; on a worldwide, perpetual, irrevocable, royalty-free basis to BMJ Publishing Group Ltd ("BMJ") its licensees and where the relevant Journal is co-owned by BMJ to the co-owners of the Journal, to publish the Work in this journal and any other BMJ products and to exploit all rights, as set out in our [licence](#).

The Submitting Author accepts and understands that any supply made under these terms is made by BMJ to the Submitting Author unless you are acting as an employee on behalf of your employer or a postgraduate student of an affiliated institution which is paying any applicable article publishing charge ("APC") for Open Access articles. Where the Submitting Author wishes to make the Work available on an Open Access basis (and intends to pay the relevant APC), the terms of reuse of such Open Access shall be governed by a Creative Commons licence – details of these licences and which [Creative Commons](#) licence will apply to this Work are set out in our licence referred to above.

Other than as permitted in any relevant BMJ Author's Self Archiving Policies, I confirm this Work has not been accepted for publication elsewhere, is not being considered for publication elsewhere and does not duplicate material already published. I confirm all authors consent to publication of this Work and authorise the granting of this licence.

1  
2  
3  
4 **·Experiences and perception of character strengths among patients**  
5  
6  
7 **with breast cancer in China: A qualitative study**  
8  
9

10  
11 Tingting YAN **PhD**<sup>1</sup>;

12 Carmen W. H. CHAN **PhD, Professor**<sup>2</sup>;

13 Ka Ming CHOW **DNur, Assistant Professor**<sup>2</sup>;

14 Mingzi Li, **PhD, Professor**<sup>1</sup>.

15  
16  
17  
18  
19  
20 **Affiliations:**

21 1 School of Nursing, Peking University, Beijing, China.

22 2 The Nethersole School of Nursing, The Chinese University of Hong Kong, New  
23 Territories, Hong Kong SAR, China  
24  
25  
26

27  
28  
29 **Correspondence:**

30 Dr. Mingzi Li, School of Nursing, Peking University, No. 38 Xueyuan Road, Haidian  
31 District, 100191 Beijing, China.  
32

33 **E-mail:** limingzi2000@163.com  
34  
35  
36  
37  
38  
39  
40  
41  
42  
43  
44  
45  
46  
47  
48  
49  
50  
51  
52  
53  
54  
55  
56  
57  
58  
59  
60

## Abstract

**Objective** To explore the patients' experiences on character strengths that Chinese patients experience after the diagnosis of breast cancer.

**Design** A qualitative, exploratory study using semi-structured interviews based on the patients' lived experience with diagnosed with breast cancer. Ethics approval was granted. Interviews were audio-recorded and transcribed verbatim. Values in Action Classification of Strengths provided conceptual framework for analysing strengths. Directed content analysis based on the classification of strengths and framework analysis were used to analyse transcribed data. The Standards for Reporting Qualitative Research (SRQR) guideline was followed.

**Setting** The Second Affiliated Hospital of Zhengzhou University and Henan Provincial Cancer Hospital in China.

**Participants** Adult patients over 18 years, diagnosed with breast cancer between October 2019 and December 2020 were recruited. We used purposive sample method to collected data from 24 participants diagnosed with breast cancer.

**Results** Six themes (virtues) emerged from our analysis. In addition, two new subthemes (character strengths) emerged in this study, selflessness and pragmatism respectively. Patients with breast cancer described a large repertoire of character strengths they used or wished for during survivorship, including gratitude, hope, humility, kindness, humor, honesty, and forgiveness. Cultural values (e.g. collectivism, familism, Confucianism and Buddhist beliefs) helped structure the experiences of Chinese patients' character strengths. Patients wanted their character strengths to be more noticed, appreciated and encouraged by others and reported their psychological trajectory of using personal strengths.

1  
2  
3 **Conclusion** The findings indicated that patients with breast cancer believing character  
4 strengths are important to them. Medical staff should pay more attention to motivating  
5 and cultivating breast cancer patients' character strengths. Attention to make strength-  
6 based practices workable in clinical health promotion programmes is necessary. The  
7 healthcare system should develop tailored individualised psychological services that  
8 specifically address patients' needs for the application of personalised character  
9 strengths.  
10  
11  
12  
13  
14  
15  
16  
17  
18  
19  
20

## 21 **KEYWORDS**

22  
23  
24 Breast cancer, character strengths, descriptive research, female, framework analysis,  
25 psycho-oncology, well-being, individualised service  
26  
27  
28  
29

## 30 **Strengths and limitations of this study**

- 31  
32  
33 ▶ The qualitative design was used to explore the breast cancer patients' complex  
34 experiences, beliefs and behaviours on character strengths.  
35  
36  
37 ▶ Semi structured individual interviews provided time and scope for participants to  
38 give detailed information about their opinions regarding character strengths.  
39  
40  
41 ▶ As qualitative methods prohibit generalisation, despite the data saturation  
42 achieved, there are results regarding transferability to other patients and different  
43 settings that should be interpreted with caution.  
44  
45  
46  
47  
48  
49  
50  
51  
52  
53  
54  
55  
56  
57  
58  
59  
60

## Introduction

Strength-based approaches are receiving increasing international attention [1], and are being applied to solve longitudinal clinical problems, such as promoting well-being and limiting ill-health [2]. Recognising and using individuals' strengths leads to positive outcomes, such as coping, recovery and greater meaning in life [3]. Instead of focusing on problems [4], researchers have proposed that character strengths should be incorporated into clinical practice to help clients enhance well-being [5]. Character is the positive and socially valued elements of personality, which have a moral component [6]. Character strengths are the core theme of positive psychology, and are a cluster of positive traits or dispositions manifested in values, thoughts, feelings, and behaviours. These personal strengths involve positive psychological qualities referring to the self, others and the world [7]. In one practical case, strength-based approaches were adopted by clinicians to help breast cancer patients deal with the continuing challenges of survivorship [8].

Character strengths promote the individual's positive cognition, emotions, and behaviours. Concentrating on strengths allows individuals to focus on more than avoiding distress or disorder [9]. Previous studies have demonstrated that character strengths are positively associated with quality of life, well-being, happiness and general health [10]. Evidence is increasing that people who use their strengths on a regular basis have higher levels of well-being [11]. However, medical staff and caregivers tend to underestimate the personal strengths of cancer patients [12].

1  
2  
3  
4 Standardised, problem-oriented care may diminish patients' chances of achieving the  
5  
6 best possible recovery [13].  
7

8  
9         Problem-oriented health care methods often overlook patients' strengths. The  
10  
11 character strengths of patients with breast cancer have consequently received little  
12  
13 attention [14]. Moreover, the majority of studies on character strengths have been  
14  
15 conducted in Western countries [14,15]. The experiences and perception of character  
16  
17 strengths among patients with breast cancer vary contextually, and the results of  
18  
19 previous studies may not be directly applicable to Chinese breast cancer patients due  
20  
21 to their social and cultural differences from Western patients [16].  
22  
23  
24  
25  
26  
27  
28  
29

### 30 **Theoretical framework**

31  
32         The most extensively researched model of character strengths is the Values in  
33  
34 Action Classification of Strengths and Virtues (VIA classification) [7]. The VIA  
35  
36 classification is a theory-driven framework comprising 24-character strengths  
37  
38 conceptually organised as reflections of six virtues: wisdom, courage, humanity,  
39  
40 justice, temperance and transcendence. Studies of different cultures have revealed  
41  
42 character strengths in different populations, including adolescents [17], college  
43  
44 students [18], adults [6] and the elderly [2]. The classification model has been  
45  
46 validated in 75 nations, with each sample including at least 150 respondents; these  
47  
48 findings suggest substantial cross-cultural similarity in strengths [19]. Virtues are  
49  
50 classes of character strengths that show individual differences but relative cross-  
51  
52 cultural stability [20]. The character strengths perspective has been recognised in the  
53  
54  
55  
56  
57  
58  
59  
60



1  
2  
3  
4 field of psychological counselling and rehabilitation as a way to understand  
5  
6 psychosocial adaptation to chronic diseases, especially cancer [21]. Because chronic  
7  
8 diseases manifest themselves through a wide variety of symptoms and functional  
9  
10 limitations [22], the specific meaning of character strengths are likely to vary across  
11  
12 specific illnesses, cultural contexts and individuals. The six core virtue categories are  
13  
14 universal, but these strengths are based on theoretical foundations [23]. Given that  
15  
16 culture plays an important role in individuals' values, assumptions and needs [24], the  
17  
18 character strengths of breast cancer patients may have different meanings and  
19  
20 manifestations across different cultures. Moreover, researchers have highlighted the  
21  
22 specific differences in the mental functioning of patients with various diseases and  
23  
24 that of healthy individuals [25]. Therefore, a study of the character strengths of breast  
25  
26 cancer patients within the Chinese context is expected to further strengthen the  
27  
28 theoretical VIA classification.  
29  
30  
31  
32  
33  
34  
35  
36  
37

38 The evidence so far indicates that character strengths are a helpful personal  
39  
40 resource [2]. However, there is a gap in the literature concerning how breast cancer  
41  
42 patients identify their own strengths and use them. The applicability of the VIA  
43  
44 classification among Chinese breast cancer patients is still unclear. Cultural values,  
45  
46 such as collectivism, the importance of family, Confucianism and Buddhism could  
47  
48 strongly determine how character strengths are expressed and the associated  
49  
50 behaviour patterns. For example, Confucianism is a uniquely Chinese cultural concept  
51  
52 that influences the definition of character strengths. This means that cultural factors  
53  
54 play an important role in the theory of strengths. In this study, we explore the  
55  
56  
57  
58  
59  
60

1  
2  
3  
4 experiences and perception of character strengths among Chinese women with breast  
5  
6 cancer.  
7  
8  
9

## 10 11 **Methods**

### 12 13 **Study design and population**

14  
15  
16  
17 In this qualitative study, we use a descriptive and exploratory approach to  
18  
19 uncover aspects of the experiences and perceptions of character strengths in Chinese  
20  
21 women with breast cancer. Semi-structured individual interviews were conducted.  
22  
23 The Standards for Reporting Qualitative Research (SRQR) were followed [26].  
24  
25

26  
27 The researchers used a maximum variation sampling method and purposive  
28  
29 sampling technique to recruit participants to richly or densely describe the culture or  
30  
31 phenomenon of interest [27]. Regarding the sample size, the recruitment of  
32  
33 interviewees stopped when the data reached a saturation point, indicating that the  
34  
35 phenomenon could be understood comprehensively without further recruitment. Data  
36  
37 saturation was achieved through repetition and confirmation of the information  
38  
39 obtained by participants, i.e. no new insights emerged from the interview data of the  
40  
41 last two included participants [28].  
42  
43  
44  
45  
46  
47

48  
49 The inclusion criteria were as follows: the patients were (a) women with a  
50  
51 confirmed diagnosis of breast cancer; (b) aged above 18 years old; (c) native Chinese;  
52  
53 (d) willing to participate in the study and offer informed consent. The exclusion  
54  
55 criteria were as follows: the patient suffered from (a) one or more other life-  
56  
57  
58  
59  
60

1  
2  
3  
4 threatening diseases, or (b) psychosis (for example, delusional disorder,  
5  
6 schizophrenia).

### 11 **Patient and public involvement**

12  
13  
14 Patients and/or the public were not involved in the design, conduct, reporting or  
15  
16 dissemination plans of this research.

### 22 **Data collection**

23  
24 We used semi-structured interviews to foster interactivity and dialogue [29].  
25  
26 The instruments used in this study included a demographic data sheet and a semi-  
27  
28 structured interview guide. The demographic data sheet was devised to obtain  
29  
30 information on the patient's age, marital status, educational level and types of breast  
31  
32 cancer treatment. The interview guide was informed by the positive psychology  
33  
34 model of character strengths and the previous literature. The interviews opened with a  
35  
36 short introduction to the topic (e.g., a definition and explanation of 'character  
37  
38 strengths'). Each interview included ten questions designed to encourage discussion  
39  
40 on perceptions and beliefs about character strengths (Table 1). Pilot interviews were  
41  
42 conducted with three breast cancer patients to check the appropriateness of the  
43  
44 interview process and the accessibility of the questions. The demographic data sheet  
45  
46 took approximately five minutes to complete, and the whole interview took  
47  
48 approximately 30 to 60 minutes.  
49  
50  
51  
52  
53  
54  
55  
56  
57  
58  
59  
60

Participant recruitment and interviews were conducted in November and December 2019 in two provincial tertiary hospitals in mainland China. To ensure consistency, the same researcher conducted all of the interviews [30]. The participants were asked for reflections and conclusions to prevent misunderstandings or omissions. Data collection was performed using audiotape recording, supplemented with handwritten notes on non-verbal behaviours and impressions.

**Table 1** Semi-structured interview guide used in this study

- 
1. From your perspective, what is your perception of character strengths?
  2. Can you share your experiences on your character strengths?
  3. Why did you use your character strengths?
  4. When you used your character strengths, were you more broadly interested in better understanding of yourself?
  5. What did you hope to achieve by your character strengths?
  6. What benefits did you expect to receive as a result of using your character strengths?
  7. In your opinion, what are the most important benefits or outcomes that have resulted from your character strengths?
  8. When you used your character strengths, were you looking for a solution to a specific problem or difficult situation?
  9. In what way(s) have your character strengths affected your daily life?
  10. In what way(s) have your character strengths help you met your expectations and/or needs?
- 

## Data Analysis

Directed content analysis and framework analysis were used to analyse the data in an combination of inductive and deductive approaches [31]. The analysis took place in five stages: (1) Stage 1, Familiarisation: Immersion in the data by repeatedly reading transcriptions and making field notes; (2) Stage 2, Analytical framework development: Preparing key topics, identifying important themes and developing the

1  
2  
3  
4 thematic framework, (3) Stage 3, Indexing: Completing data structuring and pilot  
5  
6 charting, refining and combining themes and sub-themes, (4) Stage 4, Charting:  
7  
8 Drawing summary chart and transferring data into the framework matrix, and (5)  
9  
10 Stage 5, Data mapping and interpreting: Comparing the analysis results to the original  
11  
12 data and explaining the relationship between codes, subthemes and themes [32]. The  
13  
14 VIA classification was used as the guiding framework for direct content analysis. This  
15  
16 framework is described in Table 2. The findings were presented in a synthesised form  
17  
18 of themes (virtues) and sub-themes (character strengths). No particular data software  
19  
20 was used for coding or organisational purposes. We not only sought to establish a  
21  
22 critical and common sense understanding of the text, but also to analyse it beyond  
23  
24 personal experience. We also looked for embedded character strengths in the content.  
25  
26 The themes and sub-themes were collected in a Microsoft Excel spreadsheet, with  
27  
28 supporting descriptions and quotes. Demographic data were analysed using SPSS  
29  
30 version 22.0 (SPSS, Inc., Chicago, IL) and descriptive statistics were obtained  
31  
32 (frequencies, means, standard deviations and percentages).  
33  
34  
35  
36  
37  
38  
39  
40  
41  
42  
43  
44

45 **Table 2** The Values in Action classification of virtues and character strengths

| Virtues                                                                                          | Character strengths                                           | Multiple descriptions, pronouns, and manifestations                                                                                                                                                                                                                                                                                                  |
|--------------------------------------------------------------------------------------------------|---------------------------------------------------------------|------------------------------------------------------------------------------------------------------------------------------------------------------------------------------------------------------------------------------------------------------------------------------------------------------------------------------------------------------|
| 1. Wisdom & Knowledge<br><i>Cognitive strengths related to attaining and using new knowledge</i> | Creativity<br><br>Curiosity<br><br>Judgment & Open-Mindedness | [originality, ingenuity, discovering new and innovative ways to do things, thinking of novel and productive ways to do things]<br>[openness to experience, taking an interest in all of ongoing experience, enthusiastically exploring and discovering new things]<br>[critical thinking, thinking things through and examining them from all sides] |

|                                                                                                                  |                                       |                                                                                                                                                                  |
|------------------------------------------------------------------------------------------------------------------|---------------------------------------|------------------------------------------------------------------------------------------------------------------------------------------------------------------|
|                                                                                                                  | Love of Learning                      | [Relishing in the acquisition of new skills and knowledge, mastering new skills, topics, and bodies of knowledge]                                                |
|                                                                                                                  | Perspective                           | [wisdom, providing wise counsel to others]                                                                                                                       |
| 2. Courage<br><i>Emotional strengths that involve working hard to accomplish goals in the face of opposition</i> | Bravery                               | [valor, not withdrawing or shrinking from threat, challenge, difficulty, or pain]                                                                                |
|                                                                                                                  | Perseverance                          | [persistence, finishing what one starts, industriousness, working hard to finish what is started]                                                                |
|                                                                                                                  | Honesty                               | [authenticity, integrity, speaking the truth and presenting oneself in a genuine and authentic way]                                                              |
|                                                                                                                  | Zest                                  | [vitality, enthusiasm, vigor, energy, Approaching life with excitement and energy]                                                                               |
| 3. Humanity<br><i>Interpersonal strengths that involve developing relationships and caring for other people</i>  | Capacity to Love and Be Loved         | [Valuing close relations with others]                                                                                                                            |
|                                                                                                                  | Kindness                              | [generosity, doing favors, nurturance, care, compassion, altruistic love, being generous and doing good deeds]                                                   |
|                                                                                                                  | Social Intelligence                   | [emotional intelligence, personal intelligence, being aware of the motives and feelings of self and others, knowing how to adapt to different social situations] |
| 4. Justice<br><i>Civic strengths related to be an integral part of a healthy community</i>                       | Teamwork                              | [citizenship, social responsibility, loyalty, Working collaboratively and well as member of a team or a group]                                                   |
|                                                                                                                  | Fairness                              | [Treating all people the same according to notions of fairness and justice and with impartiality]                                                                |
|                                                                                                                  | Leadership                            | [Effectively managing groups to complete activities, organizing group activities and seeing that they happen]                                                    |
| 5. Temperance<br><i>Strengths related to the use of restraint in thoughts, emotions, and behavior</i>            | Forgiveness & Mercy                   | [Forgiving those who have done wrong]                                                                                                                            |
|                                                                                                                  | Modesty & Humility                    | [Being modest and letting one's accomplishments speak for themselves]                                                                                            |
|                                                                                                                  | Prudence                              | [Being cautious about one's actions or choices; not saying or doing things that might later be regretted]                                                        |
|                                                                                                                  | Self-Regulation                       | [Regulating what one feels and does, self-control, Exercising self-control and discipline]                                                                       |
| 6. Transcendence<br><i>Strengths that provide meaning in life and exceed the limits of ordinary experience</i>   | Appreciation of Beauty and Excellence | [awe, wonder, elevation, Noticing and admiring beauty and excellence, and/or skilled performance in all domains of everyday life]                                |
|                                                                                                                  | Gratitude                             | [Being aware of and thankful for the good things that happen]                                                                                                    |
|                                                                                                                  | Hope                                  | [optimism, future-mindedness, future orientation, Expecting the best in the future, and working actively to achieve it]                                          |

|                              |                                                                                                                                      |
|------------------------------|--------------------------------------------------------------------------------------------------------------------------------------|
| Humor                        | [playfulness, enjoying laughter and amusing others, liking to laugh and joke, bringing smiles to other people]                       |
| Religiousness & Spirituality | [faith, purpose, having beliefs about life that bring comfort, having coherent beliefs about the higher purpose and meaning of life] |

Note. Terms in brackets are variants of the Character strength adapted from Peterson and Seligman (2004).

## Trustworthiness

To increase the credibility of our findings, we used a peer checking process.

Discussion continued until a consensus was reached among the co-researchers [33].

Open dialogue and careful probing were used during the interviews to ensure that the information was reliable. To enhance transferability [34], we continued interviews until data saturation occurred, made clear and distinct descriptions of the content and presented rich information from the findings.

## Ethics

All procedures were in accordance with the guidelines of the Research Ethics Committee of the University (CUHK Approval number: SBREC 19-114) and Joint Chinese University of Hong Kong–New Territories East Cluster Clinical Research Ethics Committee, reference number: 2019.429. A digital code was used to refer to each participant to maintain anonymity.

## Results

### Clinical and demographic characteristics

A total of 24 female breast cancer patients participated in the interviews. The average age of the participants was 52.54 years (range, 30–70 years). Table 3 outlines the participants' characteristics. Most of the participants had stage I/II breast cancer (66.7%), and the remainder (33.3%) had stage III/IV breast cancer. Seventeen participants (70.8%) had breast cancer in the left breast, five (20.8%) had cancer in the right breast and two (8.3%) had bilateral breast cancer.

**Table 3** Demographic information and clinical data of the participants (N = 24)

| Characteristics          | Number            | (%)  |
|--------------------------|-------------------|------|
| Age (years)              |                   |      |
| Mean $\pm$ SD            | 52.54 $\pm$ 11.56 |      |
| Range                    | 30-70             |      |
| Age <60                  | 15                | 62.5 |
| Age $\geq$ 60            | 9                 | 37.5 |
| Marital status           |                   |      |
| Married                  | 21                | 87.5 |
| Unmarried or widow       | 3                 | 12.5 |
| Occupation               |                   |      |
| Employed                 | 17                | 70.8 |
| Unemployed               | 7                 | 29.2 |
| Education states         |                   |      |
| Primary school and below | 10                | 41.7 |
| Junior school            | 4                 | 16.7 |
| Senior high school       | 7                 | 29.2 |
| Bachelor and above       | 3                 | 12.5 |
| Perceived Income         |                   |      |
| Low                      | 3                 | 12.5 |
| Middle                   | 9                 | 37.5 |
| Good                     | 7                 | 29.2 |
| High                     | 5                 | 20.8 |
| Type of cancer           |                   |      |
| Breast cancer            | 24                |      |
| Left                     | 17                | 70.8 |
| Right                    | 5                 | 20.8 |
| Two sides                | 2                 | 8.3  |



|    |                                    |      |      |
|----|------------------------------------|------|------|
| 1  |                                    |      |      |
| 2  |                                    |      |      |
| 3  | Stage of disease                   |      |      |
| 4  | I/II                               | 16   | 66.7 |
| 5  | III/IV                             | 8    | 33.3 |
| 6  |                                    |      |      |
| 7  | Time since diagnosis (months)      |      |      |
| 8  | Mean                               | 8.63 |      |
| 9  |                                    |      |      |
| 10 | Adjuvant therapy                   |      |      |
| 11 | Only had surgery                   | 10   | 41.7 |
| 12 | Also had chemotherapy or radiation | 14   | 58.3 |
| 13 | therapy                            |      |      |
| 14 |                                    |      |      |

15 *Note. Because of rounding, percentages may not total 100.*

### 21 **Character strengths identified within the VIA framework**

22  
 23  
 24 The participants' main character strengths were consistent with the VIA  
 25  
 26 classification; they included cognitive strengths, emotional strengths, civic and  
 27  
 28 community strengths, interpersonal strengths, temperance strengths and transcendence  
 29  
 30 strengths. Table 4 summarises the character strengths of the breast cancer patients.  
 31  
 32 The original 24 strengths were identified in the findings, and two new strengths of  
 33  
 34 selflessness and pragmatism emerged in our study. The themes (virtues) and sub-  
 35  
 36 themes (strengths) are illustrated by sample quotes from the participants (Table 5).  
 37  
 38 The participants also gave their perceptions and comments on the outcomes and  
 39  
 40 expectations of identifying and using individual character strengths. In general, the  
 41  
 42 participants expressed improved self-awareness and a greater sense of purpose and  
 43  
 44 well-being.  
 45  
 46  
 47  
 48  
 49  
 50  
 51  
 52  
 53  
 54  
 55  
 56  
 57  
 58  
 59  
 60

**Table 4** Adapted from values in action classifications of character strengths

| <b>Virtues</b>                      | <b>Character strengths</b>      | <b>Cultural adapted descriptions, pronouns, and manifestations</b>                                                                                                                                                                 |
|-------------------------------------|---------------------------------|------------------------------------------------------------------------------------------------------------------------------------------------------------------------------------------------------------------------------------|
| Cognitive strengths                 | Creativity                      | Ingenuity, doing things in innovative ways, thinking in innovative and unique ways; seeing things in different ways                                                                                                                |
|                                     | Curiosity                       | Interested in all experiences; motivated to discover and explore new things; want to learn about unknown objects, environments or experiences of others                                                                            |
|                                     | Judgment & Open-Mindedness      | The ability to think, understand, analyze, discern or judge rationally, independently and comprehensively; thinking carefully; defensive thinking                                                                                  |
|                                     | Love of Learning                | Studious, be eager to learn, erudite, philomathic; mastering new skills; enjoy new knowledge, enjoy learning                                                                                                                       |
|                                     | Perspective                     | Resourceful, wise, good at planning and handling things; excellent insight and vision, farsighted                                                                                                                                  |
| Emotional strengths                 | Bravery                         | Fearless, courageous, heroic, resolute, brave and bold; not timid, not afraid of danger or difficulty, not shrinking back.                                                                                                         |
|                                     | Perseverance                    | Persevere to the end, no slackness, still persevere after repeated failures; hardworking, not give up halfway; diligent, industrious                                                                                               |
|                                     | Honesty                         | True, honest; integrity, sincere and earnest, wholeheartedly; being true to oneself and others                                                                                                                                     |
|                                     | Zest                            | Enthusiastic about things or others; vigorous vitality; vividness in action, thought or expression, energetic                                                                                                                      |
| Interpersonal strengths             | Capacity to Love and be Loved   | Valuing close relations with others; give love to others, be loved by others; feel the warmth, happiness, satisfaction and beauty in love, friendship, family affection, fraternity and other deep emotions for people and things. |
|                                     | Kindness                        | Benevolent, kind-hearted; generosity, nurturance, charitable; serving others without expectation                                                                                                                                   |
|                                     | Social Intelligence             | Emotional intelligence, aware of the motives and feelings of oneself and others; knowing how to get along can make others comfortable                                                                                              |
|                                     | Teamwork                        | Working collaboratively and well as member of a team or a group, unite and work together to get better results; loyalty to team or group and working well with others                                                              |
| Civic and community strengths       | Fairness                        | Righteousness, uprightness; not afraid of the strong, not bullying the weak, stick to the right way; Treat everyone the same according to justice                                                                                  |
|                                     | Leadership                      | Confucian leadership; influence others, improve the efficiency of the entire group and ensuring team harmony                                                                                                                       |
|                                     | <b>Selflessness<sup>a</sup></b> | Dedication, not self-interested; proud to serve the collective people and ashamed to deviate from the people, proud of unity and mutual assistance, ashamed of self-interest; devotion to family and country.                      |
| Restrained and temperance strengths | Forgiveness & Mercy             | Forgive, ignore the faults of others; tolerant, considerate; not to care about wrongdoing or to hold accountable; compassion                                                                                                       |
|                                     | Modesty & Humility              | Modest, polite, humble; reserved, courteous, not exaggerating one's ability or value; no boasting or arrogance, not complacent; willing to accept criticism, and humbly ask people for advice.                                     |

|                         |                                       |                                                                                                                                                                                              |
|-------------------------|---------------------------------------|----------------------------------------------------------------------------------------------------------------------------------------------------------------------------------------------|
|                         | Prudence                              | Be cautious about actions or choices; solemnly, careful; dependable, stable, calm and not anxious in situations                                                                              |
|                         | Self-Regulation                       | Self-control; disciplined, restraint; managing personal impulses, emotions, laziness and other bad habits                                                                                    |
|                         | <b>Pragmatism<sup>a</sup></b>         | Believe practice leads to true knowledge and wealth, believe actions speak louder than words, try to be practical, realistic, committed to the reality                                       |
| Transcendence strengths | Appreciation of Beauty and Excellence | Appreciate, awe, fascinate and admire the beauty and excellence, and/or all outstanding skills, treasures or people                                                                          |
|                         | Gratitude                             | Being aware of and thankful for the good things that happened, grateful, moved by the virtues of others, grateful for the kindness and favors of others, and seek ways to return             |
|                         | Hope                                  | Optimism, positive future mindedness, full of confidence in what is going on, open-minded and have good wishes for the future                                                                |
|                         | Humor                                 | Funny, humorous, playfulness and enjoy talking witty, bring laughter and amusement to others                                                                                                 |
|                         | Religiousness & Spirituality          | Faith, believe in religion, unwavering belief, a state of mind that has trust or trust in someone or something, extremely convinced of a certain thought, doctrine, and as a personal belief |

<sup>a</sup> Newly emerged themes in the current study

**Table 5** Examples from the participants in character strengths, with their anonymous code number and age

| Character strengths        | Quotes                                                                                                                                                                                                                                                                                                          |
|----------------------------|-----------------------------------------------------------------------------------------------------------------------------------------------------------------------------------------------------------------------------------------------------------------------------------------------------------------|
| Creativity                 | I feel that I always think differently from others of my age. The way I look at things is different. I usually make some fresh and unique gadgets for the children at home (Participant 14, 45).                                                                                                                |
| Curiosity                  | I'm interested in hearing gossip about what's going on between my neighbours and where my relatives have travelled, or finding out what grocery they recommend and where supermarkets are offering cheaper discounts. I'm interested in all these experiences and things, sort of curious (Participant 22, 53). |
| Judgment & Open-Mindedness | I think I'm older, but much wiser than when I was younger. I've been through a lot of things and I'm not so attached and concerned about everything. Nowadays, when things come up again, I think very rationally and calmly about what to do, unlike the young people who are so whiny (Participant 17, 47).   |
| Love of Learning           | I usually learn a new thing, that is, learn to dance the popular square dance to divert my attention. Recently I learnt to play new cellphone apps like Douyin and Kuaishou with my friends. I feel that I do not have time to be unhappy when learning new things (Participant 1, 48).                         |
| Perspective                | My personality is very good, just love to study and love to work. I usually use two mobile phones to study, and all the recordings on the other mobile phone (Participant 11, 30).                                                                                                                              |
| Bravery                    | I think life is only a few decades, like a white horse passing a gap. Sooner or later, it is the same thing. The key is that you must think about it and look down on everything. This is the wisdom of survival (Participant 3, 54).                                                                           |
| Perseverance               | I think I dare to face these things myself. But my body is my own business, I must be brave (Participant 3, 54).                                                                                                                                                                                                |
|                            | My husband can feel that I am strong and persistent. Compared with others, the advantages my character brings is I can be a bit stronger against stress. (Participant 2,                                                                                                                                        |

|    |               |                                                                                              |
|----|---------------|----------------------------------------------------------------------------------------------|
| 1  |               |                                                                                              |
| 2  |               |                                                                                              |
| 3  |               | 67).                                                                                         |
| 4  |               | I worked very hard in my work unit before, just want to get a promotion next year.           |
| 5  |               | Unexpectedly, this illness disrupted the plan (Participant 4, 32).                           |
| 6  | Honesty       | I am an ordinary person, I'm just straight hearted, and then I just say what I think, that   |
| 7  |               | is, I am honest and sincere (Participant 1, 48).                                             |
| 8  | Zest          | Because I am passionate about making friends in the square dance group, now I am             |
| 9  |               | sick and many partners come to see me. I was encouraged when they came (Participant          |
| 10 |               | 10, 52).                                                                                     |
| 11 | Capacity to   | I am filial to my parents-in-law and be a good daughter-in-law. After being sick, I am       |
| 12 | Love and be   | very happy and feel beloved to be taken care of after a long time. I feel that my            |
| 13 | Loved         | families support me and love me (Participant 1, 48).                                         |
| 14 | Kindness      | Then I never did anything bad. Then I felt like I was very nice. I was just being kind to    |
| 15 |               | others. Repay grievances with virtue and be compassionate (Participant 1, 48).               |
| 16 |               | I believe benevolent must be rewarded with kindness. I've always been a good person          |
| 17 |               | (Participant 3, 54).                                                                         |
| 18 | Social        | Every time my family came, I said I was fine and did not want them to worry                  |
| 19 | Intelligence  | (Participant 9, 65).                                                                         |
| 20 | Teamwork      | Three cobblers with their wits combined, equal Zhuge Liang the master mind-                  |
| 21 |               | collective wisdom often proves superior (two heads are better than one) (Participant 4,      |
| 22 |               | 32).                                                                                         |
| 23 |               | I used to work, and I can have a good relationship with my colleagues and                    |
| 24 |               | subordinates (Participant 11, 30).                                                           |
| 25 | Fairness      | Any conflicts between them can be handled fairly no matter what I say. I got this            |
| 26 |               | disease and I cannot do anything now (Participant 11, 30).                                   |
| 27 | Leadership    | I was also a small head in the unit before, and how to allocate jobs to everyone             |
| 28 |               | harmoniously is also a skill, and it can improve the efficiency of the entire department     |
| 29 |               | (Participant 12, 35).                                                                        |
| 30 |               | I have made it to the position of department manager in my organisation and would not        |
| 31 |               | have missed work had I not been ill. I had to get my people's affairs in order before I      |
| 32 |               | was admitted to hospital (Participant 24, 37).                                               |
| 33 |               | I feel that I am selfless. I have sacrificed my whole life, sacrificed for my family, and    |
| 34 |               | cooperated with national policies. I feel that our generation pays more attention to the     |
| 35 |               | collective and puts everyone's interests ahead of their own. This is also written in the     |
| 36 | Selflessness  | Eight Honors and Eight Shames (Participant 13, 60).                                          |
| 37 |               | It is proud to serve the collective people and ashamed to deviate from the people. We        |
| 38 |               | are proud of unity and mutual assistance, and ashamed of self-interest (Participant 16,      |
| 39 |               | 56).                                                                                         |
| 40 | Forgiveness & | Well, I think everyone is good, but many patients are now demanding and dissatisfied         |
| 41 | Mercy         | with the people around them. Sometimes they lose their temper at the small mistakes          |
| 42 |               | of doctors and nurses. It is better to be tolerant and forgive like me (Participant 11, 30). |
| 43 | Modesty &     | My family and patients still thought I was humble. I feel that my personality is simple,     |
| 44 | Humility      | and I get along well with everyone (Participant 5, 52).                                      |
| 45 | Prudence      | I take photographs of the bags of medication that I receive infusions of and the             |
| 46 |               | medication that I take every day. I also keep the bill for each payment. I often talk to     |
| 47 |               | my doctor about my condition and I think that being discreet will give me peace of           |
| 48 |               | mind (Participant 23, 38).                                                                   |
| 49 | Self-         | I felt that my self-discipline was meaningful, so I strengthened my exercise.                |
| 50 | Regulation    | (Participant 8, 55).                                                                         |
| 51 | Pragmatism    | Practice brings real wealth, it speaks louder than words (Participant 3, 54).                |
| 52 |               | I am a pragmatic person, I don't know how to say nice things. I do not afraid and have       |
| 53 |               | no time to feel depressed. I do not want to worry about it. I just want to eat and drink     |
| 54 |               | and do my work. I do not want anything else (Participant 2, 67)                              |
| 55 | Appreciation  | I was reading a novel about the philosophy of life recently. I will read this book after     |
| 56 | of Beauty and | treatment. I feel comfortable appreciating these beautiful things. I also appreciate the     |
| 57 | Excellence    | natural environment and feel better (Participant 12, 35).                                    |
| 58 | Gratitude     | Everyone, whether old or young, should know how to be grateful (Participant 1, 48).          |
| 59 |               | I think the nurses here have given me a lot of help, and the doctors respect my ideas        |
| 60 |               | and help me with treatment. I am very grateful to them. The services in the hospital are     |

|                              |                                                                                                                                                                                                                                                        |
|------------------------------|--------------------------------------------------------------------------------------------------------------------------------------------------------------------------------------------------------------------------------------------------------|
|                              | very good, so I feel very good (Participant 3, 54).                                                                                                                                                                                                    |
|                              | I feel that the doctors, nurses and family members are very concerned about me. Everyone has a very good attitude. It is not easy for everyone to work and live. I have a lot of spiritual support. I am very grateful (Participant 11, 30).           |
| Hope                         | My family is pampering me now, which is pretty good. My husband said that I have been optimistic in the past years. Well, I just want to be stronger anyway, everything will definitely get better (Participant 2, 67).                                |
| Humor                        | But sometimes when I chat with patients in the department, no matter what I say, everyone is very happy. It feels like I am everyone's pistachio. But I think I am more cute than humorous (Participant 5, 52).                                        |
| Religiousness & Spirituality | Just to get better soon, and live a few more years, I have been chanting and believing in Buddha. My child also said that I had changed but felt that my mentality was much better and calmer after relying on faith and religion (Participant 7, 65). |

### Theme 1: Cognitive strengths

Cognitive strengths reflect wisdom, knowledge, exploration, openness and knowledge-seeking [7]. This theme involves five strengths: creativity, curiosity, judgment and open-mindedness, love of learning, and perspective. These subthemes reflect the manifestations of cognitive strengths based on wisdom, openness and knowledge. In response to unexpected situations or unfamiliar problems, the participants usually gave wise solutions. Some participants aided their recovery by reading about treatment and nursing skills, which also demonstrated their love of learning. Love of learning refers to cognitive engagement, mastering new skills and increasing existing knowledge [35]. Creativity refers to original and adaptive thought or behaviour. The narratives of the participants also reflected how they found new ways to deal with the familial and social problems encountered while receiving treatment.

### Theme 2: Emotional strengths

1  
2  
3  
4 When the participants talked about their lives after breast cancer and the  
5  
6 inherent difficulties they faced, they also showed the emotional strengths of courage,  
7  
8 perseverance, honesty and enthusiasm. This theme involves four strengths: bravery,  
9  
10 perseverance, honesty and zest. These subthemes reflect the Chinese manifestations of  
11  
12 emotional strengths. Being brave means not shrinking from challenges [36]. For  
13  
14 example, some participants said that they dared to face physical damage after breast  
15  
16 surgery and hair loss after chemotherapy. They felt that living was more important  
17  
18 than these considerations. Bravery enabled self-determination and helped them  
19  
20 actively persevere. Other participants said frankly that they told their family members  
21  
22 about their fear of death, while emphasising that their family members remained  
23  
24 encouraging and supportive.  
25  
26  
27  
28  
29  
30  
31  
32  
33  
34

### 35 **Theme 3: Interpersonal strengths**

36  
37 Interpersonal strengths clearly reflect humanity and justice. They include love,  
38  
39 kindness, social intelligence and developing relationships and caring for other people.  
40  
41 This theme involves three strengths: capacity to love and be loved, kindness and  
42  
43 social intelligence. Social intelligence is the awareness of the motives and feelings of  
44  
45 oneself and others, and knowing how to adapt to different social situations [36]. This  
46  
47 was demonstrated by many participants, especially patients who got along well with  
48  
49 roommates and nurses during hospitalisation.  
50  
51  
52  
53  
54  
55  
56  
57

### 58 **Theme 4: Civic and community strengths**

1  
2  
3  
4 Civic strengths are considered an integral part of a healthy community; they  
5  
6 include teamwork, fairness and leadership. In our study, we also identified a fourth  
7  
8 civic strength: selflessness. Teamwork refers to social responsibility and working  
9  
10 collaboratively as a member of a team or group. Fairness involves treating people the  
11  
12 same according to principles of justice. Selflessness refers to dedication, rather than  
13  
14 self-interest. This is a distinct cultural strength proposed by the Chinese participants  
15  
16 in the study. Participants thought this was one of their strengths, which helped them  
17  
18 obtain the respect of others and society.  
19  
20  
21  
22  
23  
24  
25  
26

### 27 **Theme 5: Restraint and temperance strengths**

28  
29  
30 Restraint and temperance strengths encompass forgiveness, modesty, prudence  
31  
32 and self-regulation. In our study, this theme also contains a fifth strength: pragmatism.  
33  
34 Modesty means an unwillingness to praise oneself and show off one's qualities or  
35  
36 achievements [2,36]. In all of our interviews, when we first mentioned expressing  
37  
38 personal strengths, the participants often avoided talking and reflected that humility is  
39  
40 a common occurrence. The participants were reluctant to talk about their own  
41  
42 achievements and character strengths. They thought that talking about this would  
43  
44 violate their culture's respect for humility, and they were embarrassed. In contrast,  
45  
46 they were more willing to admit that they had many shortcomings. Chinese Confucian  
47  
48 view has evolved into the view that humility makes people grow, while complacency  
49  
50 and pride make people degenerate [37]. Pragmatism is related to facts or practical  
51  
52 matters, and usually excludes intellectual or artistic matters. Pragmatism is a new  
53  
54  
55  
56  
57  
58  
59  
60



1  
2  
3  
4 emergent subtheme, which means practicality rather than idealism. This is another  
5  
6 distinctly Chinese strength that may be related to China's long period of construction  
7  
8 and development.  
9  
10

### 11 12 13 14 **Theme 6: Transcendence strengths**

15  
16  
17 Transcendence strengths provide meaning in life and exceed the limits of  
18  
19 ordinary experience. This theme contains five strengths: appreciation of beauty and  
20  
21 excellence, gratitude, hope, humour, and religiousness and spirituality. Although the  
22  
23 participants mentioned that their spirituality was related to Buddhism, it was more  
24  
25 about how they gained strength from their belief system and cultural values. These  
26  
27 strengths gave the participants guidelines, made them feel special, and enabled them  
28  
29 to cope with the negative things in their life and treatment. Gratitude and spirituality  
30  
31 were common strengths across all of the interviews. The participants mentioned that  
32  
33 they tended to gain comfort from these strengths after their diagnosis, despite their  
34  
35 physical weakness and psychological dysfunction.  
36  
37  
38  
39  
40  
41  
42  
43  
44

### 45 **Positive outcomes and expectations of identifying and using character strengths**

46  
47  
48 Several subjective positive outcomes were frequently addressed by the  
49  
50 participants in connection with the awareness of strengths. They included improved  
51  
52 self-awareness, personal confidence and self-esteem, increased happiness, optimism, a  
53  
54 greater sense of meaning in life, improved well-being and decreased distress. Better  
55  
56 well-being and a sense of meaning were the most frequently addressed benefits  
57  
58  
59  
60



(mentioned eleven times). In addition, in reference to these outcomes, most of the related strengths were those that involved reconnecting with people, such as gratitude, kindness, selflessness and love. The most frequently quoted proverb was ‘good people get rewards’ (mentioned eight times); that is, they felt that if they did good deeds for others, their health and life would improve.

## Discussion

The patients with breast cancer in this study described a large repertoire of character strengths they used or wished for during survivorship. In line with previous studies [2], most of the themes and sub-themes coded in this study were in line with VIA. Two more strengths — selflessness and pragmatism — emerged. Cultural values and culture (e.g., collectivism, importance of family, Confucianism and Buddhism) helped structure the participants strengths and influenced their descriptions.

In our study, the participants with breast cancer did not differ from the healthy individuals studied in the previous literature in terms of transcendence strengths (appreciation of beauty and excellence, religiousness, spirituality) and cognitive strengths (wisdom and knowledge). These are potential characteristics of breast cancer patients that they can use when experiencing life and treatment events. These results are reflected in traditional palliative care or existing psychosocial programmes for breast cancer patients, in which patients are taught to express appropriate emotion and improve their problem-solving skills as part of the recovery process [38]. The

1  
2  
3  
4 breast cancer patients in this study experienced a similar appreciation of beauty. They  
5  
6 appreciated excellence in all areas of life (art, nature and daily life) and in other  
7  
8 people. They had coherent beliefs about truth and life independent of their disease and  
9  
10 treatment.  
11  
12

13  
14 The experiences of emotional strengths, interpersonal strengths, civic and  
15  
16 community strengths, restrained and temperance strengths, and other types of strength  
17  
18 are significantly influenced by breast cancer and cultural values. Kindness and  
19  
20 gratitude are associated with positive affect [36], and were the character strengths  
21  
22 most frequently expressed by the participants. Studies have consistently shown that  
23  
24 strengths of the heart, such as kindness and gratitude, are more strongly associated  
25  
26 with well-being than individual strengths, such as creativity and leadership. The other  
27  
28 character strengths most frequently mentioned by the participants were love,  
29  
30 selflessness, honesty, modesty and hope. This coincides with the perception of  
31  
32 character in Chinese culture. Chinese people have inherited the Confucian emphasis  
33  
34 on the cultivation of good character traits, like benevolence and kindness [39].  
35  
36 Kindness and fairness are the important characteristics in the traditional culture of  
37  
38 benevolence and righteousness. Some of the participants emphasised that their belief  
39  
40 in Buddhism and religious practice made them feel much calmer during their breast  
41  
42 cancer episode, and they felt that their spirit and beliefs gave them hope and gave life  
43  
44 new meaning. This finding also suggests that spirituality/religiousness is related to  
45  
46 meaning and goals in life [40].  
47  
48  
49  
50  
51  
52  
53  
54  
55  
56  
57  
58  
59  
60

1  
2  
3  
4 Concepts also need to be understood within the prevailing sociocultural and  
5  
6 political context [41]. The two newly emerging strengths are influenced by  
7  
8 contemporary culture and policies. Selflessness refers to the characteristic Chinese  
9  
10 concept that people should not be self-interested, be proud to serve the collective and  
11  
12 ashamed to deviate from it, and strive for unity. Pragmatism emphasises beliefs that  
13  
14 practice will lead to true knowledge and wealth; it has been strengthened by modern  
15  
16 development policies.  
17  
18  
19  
20  
21

22 Throughout the research process, the participants had difficulty identifying  
23  
24 and talking about their strengths. This may demonstrate their strength of modesty.  
25  
26 Such humbleness could be influenced by Chinese Confucian culture [39]. Other  
27  
28 studies have also identified this barrier to the expression of strengths [2]. The  
29  
30 challenges encountered by our participants in transforming their strengths into  
31  
32 descriptive language may reflect their need for more opportunities for self-awareness  
33  
34 and self-reflection. Another possible explanation is the conceptual overlap between  
35  
36 strengths and cultural values. This overlap may lead people to underestimate their  
37  
38 capabilities [42] and their interpersonal and cognitive strengths. The participants also  
39  
40 highlighted that they wanted their character strengths to be more noticed, appreciated  
41  
42 and encouraged by others, such as family members and medical caregivers. Chinese  
43  
44 culture emphasises the role of the family. The affairs of family members are usually  
45  
46 determined by the entire family [43]. In such a collectivist environment, individual  
47  
48 character is often not valued. Interaction with physicians and nurses was also  
49  
50 highlighted. The women's high respect for physicians and reliance on nurses led them  
51  
52  
53  
54  
55  
56  
57  
58  
59  
60

1  
2  
3  
4 to attach great importance to communication. The awareness and praise of personal  
5  
6 character strengths by family members and medical caregivers enhanced their sense  
7  
8 of self-esteem and well-being while living with breast cancer. One previous study  
9  
10 similarly demonstrated that overcoming blindness to strengths could improve an  
11  
12 individual's self-efficacy and self-confidence, which in turn could affect their well-  
13  
14 being [44].  
15  
16  
17  
18  
19  
20  
21

### 22 **Theoretical considerations and implications**

23  
24 Although there are other current theories and frameworks based on strengths,  
25  
26 they have a number of limitations; in contrast, VIA has achieved a wide range of  
27  
28 applications. Roux, Dingley and Bush (2002) introduced the theory of inner strength  
29  
30 and Lundman et al. (2010) offered a conceptual model of four core dimensions  
31  
32 [45,46]. However, most related studies have been carried out on women. Expressions  
33  
34 of inner strength at different ages and in different life circumstances take different  
35  
36 forms [41]. Janssen, Van Regenmortel, and Abma (2011) identified sources of  
37  
38 strength in three domains, individual, interactional and contextual, but did not define  
39  
40 the strengths [47]. In a similar Chinese study, Duan and Ho (2017) used the VIA  
41  
42 theory of character strengths, but their three-dimensional model of strengths  
43  
44 (temperance, intellectual, and interpersonal) was generalised to the non-clinical  
45  
46 community [48].  
47  
48  
49  
50  
51  
52  
53  
54

55  
56 Our findings among breast cancer patients support the theoretical  
57  
58 understanding of strengths [7]. Our study examined the viability of the popular VIA  
59  
60

1  
2  
3  
4 theory among a specific population in the Chinese context. The findings also extend  
5  
6 the theoretical and empirical evidence for the VIA model to the population of patients  
7  
8 with breast cancer in China. This compatibility and integration of strengths theory and  
9  
10 traditional values may make the VIA more than a conceptual tool. Although the  
11  
12 original VIA classification framework applied to a range of religions, philosophies  
13  
14 and cultures, the situational themes of strengths could be expressed in different life  
15  
16 domains or specific contexts/situations [48]. In our study, the patients with breast  
17  
18 cancer were in a special context with various challenges. It is important to note that  
19  
20 the VIA is still being refined, so the list of strengths may change accordingly [49].  
21  
22 Therefore, further research is needed to test the VIA among breast cancer patients  
23  
24 with various characteristics.  
25  
26  
27  
28  
29  
30  
31  
32  
33  
34

### 35 **Clinical implications**

36  
37 It is important to emphasise the psychological strengths of breast cancer  
38  
39 patients and their abilities related to their personal traits in a kind of individual-  
40  
41 oriented salutogenic approach [35]. Strengths that are associated with positive  
42  
43 outcomes are those that link people together, such as gratitude, kindness, selflessness  
44  
45 and love. However, for nurses, psychological counsellors and other professionals,  
46  
47 further research is needed to optimise the description of strengths and evaluation for  
48  
49 patients in China.  
50  
51  
52  
53  
54

55  
56 To our knowledge, this is the first study to describe Chinese breast cancer  
57  
58 patients' perceptions and experiences of character strengths. The findings indicate that  
59  
60

1  
2  
3  
4 character strength is a crucial psychological resource during patients' survivorship.  
5  
6  
7 Further research is needed to learn more about the strengths of a larger population of  
8  
9  
10 breast cancer patients with different backgrounds. In addition, strength identification  
11  
12 and knowledge are only prerequisites. Using strengths is what leads to valuable  
13  
14 outcomes. It is also necessary to explore strategies and interventions to help breast  
15  
16 cancer patients mobilise their personal strengths. Strength-based practices adapted to  
17  
18 Chinese breast cancer patients should be developed in clinical programmes.  
19  
20  
21  
22  
23

### 24 **Study limitations**

25  
26  
27 Although we have provided some important findings on the strengths of breast  
28  
29 cancer patients, this study has several limitations. First, the generalisability of the  
30  
31 results is limited. The number of participants was small. The study hospital was a  
32  
33 provincial hospital that admitted patients from central China. Second, the findings  
34  
35 were based on the statements of the participants. Additional studies are needed to  
36  
37 explore the generalisability of our findings. Another limitation may be the definition  
38  
39 of character strengths. This study used the core descriptive elements provided by  
40  
41 Peterson and Seligman (2004) [12]. Making use of a broader study of strengths could  
42  
43 overcome this limitation, especially for those who are less familiar with character  
44  
45 strengths and those who have difficulty in describing them. Replicating the study  
46  
47 might increase its validity by allowing participants more time to become familiar with  
48  
49 strengths and to speculate about expressions based on their individual experiences.  
50  
51  
52  
53  
54  
55  
56  
57  
58  
59  
60

## Conclusion

This study revealed the obstacles encountered by breast cancer patients in describing their own strengths but proved that it is possible to uncover their character strengths. An evidence base is needed to optimise breast cancer patients' awareness of their strengths. Breast cancer patients' perceptions of character strengths are affected by various issues related to personal experience with breast cancer and cultural values. The participants in this study experienced better well-being and a greater sense of purpose in life due to character strengths that reconnected people. This study highlights the importance of cultural values to the construct of character strengths. Finally, this study established a theoretically sound model for understanding and addressing strengths in Chinese clinical breast cancer care with clear, culturally specific descriptions.

**Acknowledgements** The authors are grateful to all the participants who generously gave their time to take part in an interview for this study and shared their experiences.

**Contributors** YTT contributed to the conception and design, data collection by conducting the interviews, analysis and interpretation, drafted and reviewed the manuscript. CC contributed to the conception and design, interpretation and reviewed the manuscript. CKM and LMZ contributed to the conception and design and reviewed the manuscript. All authors have given final approval of the version to be published and agree to be accountable for all aspects of the work in ensuring that questions related to the accuracy or integrity of any part of the work are appropriately investigated and resolved. YTT is responsible for the overall content as guarantor.

1  
2  
3  
4 **Funding** This research did not receive any specific grant from funding agencies in the  
5 public, commercial or not-for-profit sectors.  
6

7  
8 **Competing interests** The authors declare they have no conflict of interest.  
9

10 **Patient and public involvement** Patients and/or the public were not involved in  
11 the design, conduct, reporting or dissemination plans of this research.  
12  
13

14  
15 **Patient consent for publication** A digital code was used to refer to each participant  
16 to maintain anonymity. Patient consent for publication Consent obtained directly from  
17 patient(s).  
18  
19

20  
21 **Ethics approval** All procedures were in accordance with the guidelines of the  
22 Research Ethics Committee of the University (CUHK Approval number: SBREC 19-  
23 114) and Joint Chinese University of Hong Kong–New Territories East Cluster  
24 Clinical Research Ethics Committee, reference number: 2019.429. This study was in  
25 accordance with the ethical standards of the institutional research committee and with  
26 the 1964 Helsinki declaration and its later amendments.  
27  
28  
29  
30  
31  
32  
33

34 **Provenance and peer review** Not commissioned; externally peer reviewed.  
35  
36

37 **Data availability statement** Data are available on reasonable request.  
38  
39  
40  
41  
42  
43  
44  
45  
46  
47  
48  
49  
50  
51  
52  
53  
54  
55  
56  
57  
58  
59  
60



## References

- 1 Moyle W, Parker D, Bramble M. *Care of older adults. A strengths-based approach*. Sydney: : Cambridge University Press 2014.
- 2 Waterworth S, Raphael D, Gott M, *et al*. Uncovering strengths within community dwelling older adults: What does it mean for health care practice? *Heal Soc Care Community* 2019;:1–9. doi:10.1111/hsc.12924
- 3 Gottlieb LN, Gottlieb B. Strengths-Based Nursing: A Process for Implementing a Philosophy Into Practice. *J Fam Nurs* 2017;**23**:319–40. doi:10.1177/1074840717717731
- 4 Duan W, Bu H. Development and initial validation of a short three-dimensional inventory of character strengths. *Qual Life Res* 2017;**26**:2519–31. doi:10.1007/s11136-017-1579-4
- 5 Jeste D V., Palmer BW, Boardman S, *et al*. Integrating Positive Psychiatry Into Clinical Practice. In: *Positive Psychiatry*. 2015. doi:10.1176/appi.books.9781615370818.dj12
- 6 McGrath RE, Hall-Simmonds A, Goldberg LR. Are Measures of Character and Personality Distinct? Evidence From Observed-Score and True-Score Analyses. *Assessment* 2020;**27**:117–35. doi:10.1177/1073191117738047
- 7 Peterson C, Seligman ME. *Character strengths and virtues A handbook and classification*. New York: : Oxford University Press 2004.
- 8 Pieters HC. ‘i’m Still Here’: Resilience among older survivors of breast cancer. *Cancer Nurs* 2016;**39**:E20–8. doi:10.1097/NCC.0000000000000248

- 1  
2  
3  
4 9 Seligman M. Flourish: a visionary new understanding of happiness and well-  
5  
6 being. In: *Choice Reviews Online*. 2011. 48-7217-48-7217.  
7  
8  
9 doi:10.5860/choice.48-7217  
10  
11 10 Shimai S, Otake K, Park N, *et al*. Convergence of character strengths in  
12  
13 American and Japanese young adults. *J Happiness Stud* 2006;**7**:311-22.  
14  
15  
16 doi:10.1007/s10902-005-3647-7  
17  
18  
19 11 Baumann D, Ruch W, Margelisch K, *et al*. Character Strengths and Life  
20  
21 Satisfaction in Later Life: an Analysis of Different Living Conditions. *Appl Res*  
22  
23 *Qual Life* Published Online First: 2019. doi:10.1007/s11482-018-9689-x  
24  
25  
26  
27 12 Chan CWH, Chang AM. Stress associated with tasks for family caregivers of  
28  
29 patients with cancer in Hong Kong. *J Adv Nurs* 1999;**29**:484-9.  
30  
31  
32 doi:10.1097/00002820-199908000-00002  
33  
34  
35 13 So WKW, Choi KC, Chen JMT, *et al*. Quality of life in head and neck cancer  
36  
37 survivors at 1 year after treatment: the mediating role of unmet supportive care  
38  
39 needs. *Support Care Cancer* 2014;**22**:2917-26. doi:10.1007/s00520-014-2278-  
40  
41  
42 0  
43  
44  
45 14 Rotegard AK, Fagermoen MS, Ruland CM. Cancer patients' experiences of  
46  
47 their personal strengths through illness and recovery. *Cancer Nurs* 2012;**35**:8-  
48  
49  
50 17. doi:10.1097/NCC.0b013e3182116497  
51  
52  
53 15 Niemiec R, Rashid T, Spinella M. Strong Mindfulness: Integrating Mindfulness  
54  
55 and Character Strengths. *J Ment Heal Couns* 2015;**34**:240-53.  
56  
57  
58 doi:10.17744/mehc.34.3.34p6328x2v204v21  
59  
60

- 1  
2  
3  
4 16 Fang SY, Lin YC, Chen TC, *et al.* Impact of marital coping on the relationship  
5  
6 between body image and sexuality among breast cancer survivors. *Support*  
7  
8  
9 *Care Cancer* 2015;**23**:2551–9. doi:10.1007/s00520-015-2612-1  
10  
11  
12 17 Wagner L, Ruch W. Good character at school: Positive classroom behavior  
13  
14 mediates the link between character strengths and school achievement. *Front*  
15  
16 *Psychol* 2015;**6**:1-13. doi:10.3389/fpsyg.2015.00610  
17  
18  
19 18 Lim YJ. Relations between virtues and positive mental health in a Korean  
20  
21 population: A Multiple Indicators Multiple Causes (MIMIC) model approach.  
22  
23 *Int J Psychol* 2015;**50**:272–8. doi:10.1002/ijop.12096  
24  
25  
26  
27 19 McGrath RE. Character strengths in 75 nations: An update. *J Posit Psychol*  
28  
29 2015;**10**:41–52. doi:10.1080/17439760.2014.888580  
30  
31  
32  
33 20 Hanks RA, Rapport LJ, Waldron-Perrine B, *et al.* Role of character strengths in  
34  
35 outcome after mild complicated to severe traumatic brain injury: A positive  
36  
37 psychology study. *Arch Phys Med Rehabil* 2014;**95**:2096–102.  
38  
39  
40  
41  
42  
43  
44 21 Macaskill A. Review of Positive Psychology Applications in Clinical Medical  
45  
46 Populations. *Healthcare* 2016;**4**:66. doi:10.3390/healthcare4030066  
47  
48  
49 22 Yan T, Chan CWH, Chow KM, *et al.* A systematic review of the effects of  
50  
51 character strengths-based intervention on the psychological well-being of  
52  
53 patients suffering from chronic illnesses. *J Adv Nurs* 2020;**76**:1567–80.  
54  
55  
56  
57  
58  
59  
60  
doi:10.1111/jan.14356

- 1  
2  
3  
4 23 Ruch W, Proyer RT. Mapping strengths into virtues: The relation of the 24  
5  
6 VIA-strengths to six ubiquitous virtues. *Front Psychol* 2015;**6**:1–12.  
7  
8  
9 doi:10.3389/fpsyg.2015.00460  
10  
11  
12 24 Markus HR, Kitayama S. Culture and the self: Implications for cognition,  
13  
14 emotion, and motivation. *Psychol Rev* 1991;**98**:224–53. doi:10.1037/0033-  
15  
16 295X.98.2.224  
17  
18  
19 25 Chan CWH, Law BMH, So WKW, *et al.* Novel strategies on personalized  
20  
21 medicine for breast cancer treatment: An update. *Int J Mol Sci* 2017;**18**:2423.  
22  
23 doi:10.3390/ijms18112423  
24  
25  
26  
27 26 O’Brien BC, Harris IB, Beckman TJ, *et al.* Standards for reporting qualitative  
28  
29 research: A synthesis of recommendations. *Acad Med* 2014;**89**:1245–51.  
30  
31 doi:10.1097/ACM.0000000000000388  
32  
33  
34  
35 27 Lusardi P. Qualitative Research in Nursing: Advancing the Humanistic  
36  
37 Imperative. *Nurs Res* 1996;**45**:62. doi:10.1097/00006199-199601000-00014  
38  
39  
40 28 Henderson PD, Gore S V., Davis BL, *et al.* African American women coping  
41  
42 with breast cancer: a qualitative analysis. *Oncol Nurs Forum* 2003;**30**:641–7.  
43  
44 doi:10.1188/03.ONF.641-647  
45  
46  
47  
48 29 Pitre NY, Myrick F. A view of nursing epistemology through reciprocal  
49  
50 interdependence: towards a reflexive way of knowing. *Nurs Philos* 2007;**8**:73–  
51  
52 84. doi:10.1111/j.1466-769X.2007.00298.x  
53  
54  
55  
56 30 Palinkas LA, Horwitz SM, Green CA, *et al.* Purposeful Sampling for  
57  
58 Qualitative Data Collection and Analysis in Mixed Method Implementation  
59  
60

- 1  
2  
3  
4 Research. *Adm Policy Ment Heal Ment Heal Serv Res* 2015;**42**:533–44.  
5  
6 doi:10.1007/s10488-013-0528-y  
7  
8  
9 31 Ritchie J, Spencer L. Qualitative data analysis for applied policy research. In:  
10  
11 *Analyzing qualitative data*. 2010. 173–94.  
12  
13 doi:10.4324/9780203413081\_chapter\_9  
14  
15  
16 32 Barasteh S, Rassouli M, Parandeh A, *et al*. Palliative care in the health system  
17  
18 of Iran: A review of the present status and the future challenges. *Asian Pacific*  
19  
20 *J Cancer Prev* 2020;**21**:845–51. doi:10.31557/APJCP.2020.21.3.845  
21  
22  
23  
24 33 Fox DE, Quinn RR, James MT, *et al*. Social Support in the Peritoneal Dialysis  
25  
26 Experience: A Qualitative Descriptive Study. *Can J Kidney Heal Dis* 2020;**7**.  
27  
28 doi:10.1177/2054358120946572  
29  
30  
31  
32 34 Sandelowski M. The problem of rigor in qualitative research. *ANS Adv Nurs*  
33  
34 *Sci* 1986;**8**:27–37. doi:10.1097/00012272-198604000-00005  
35  
36  
37  
38 35 Guse T, Hudson D. Psychological strengths and posttraumatic growth in the  
39  
40 successful reintegration of South African ex-offenders. *Int J Offender Ther*  
41  
42 *Comp Criminol* 2014;**58**:1449–65. doi:10.1177/0306624X13502299  
43  
44  
45  
46 36 Niemiec RM. *Character strengths interventions. A field guide for practitioners*.  
47  
48 Boston, MA: : Hogrefe Publishing 2018.  
49  
50  
51 37 Li J. Humility in learning: A Confucian perspective. *J Moral Educ*  
52  
53 2016;**45**:147–65. doi:10.1080/03057240.2016.1168736  
54  
55  
56 38 Spiegel D. Psychosocial aspects of breast cancer treatment. *Semin Oncol*  
57  
58 1997;**24**:S1-36-S1-47.  
59  
60

- 1  
2  
3  
4 39 Guo Z. Chinese Confucian culture and the medical ethical tradition. *J Med*  
5  
6 *Ethics* 1995;**21**:239–46. doi:10.1136/jme.21.4.239  
7  
8  
9 40 Moale AC, Rajasekhara S, Ueng W, *et al.* Educational intervention enhances  
10  
11 clinician awareness of Christian, Jewish, and Islamic teachings around end-of-  
12  
13 life care. *J Palliat Med* 2019;**22**:62–70. doi:10.1089/jpm.2018.0077  
14  
15  
16 41 Lundman B, Aléx L, Jonsén E, *et al.* Inner strength-A theoretical analysis of  
17  
18 salutogenic concepts. *Int J Nurs Stud* 2010;**47**:251–60.  
19  
20 doi:10.1016/j.ijnurstu.2009.05.020  
21  
22  
23 42 Tang X, Li Y, Duan W, *et al.* Character strengths lead to satisfactory  
24  
25 educational outcomes through strength use: A longitudinal analysis. *Front*  
26  
27 *Psychol* 2019;**10**:1-9. doi:10.3389/fpsyg.2019.01829  
28  
29  
30 43 Ling M, Wang X, Ma Y, *et al.* A Review of the Current State of Hospice Care  
31  
32 in China. *Curr Oncol Rep* 2020;**22**:1–7. doi:10.1007/s11912-020-00959-y  
33  
34  
35 44 Waters LE. Strength-based parenting and life satisfaction in teenagers. *Adv Soc*  
36  
37 *Sci Res J* 2015;**2**:158–173. doi:10.14738/assrj.211.1551  
38  
39  
40 45 Roux G, Dingley C, Bush H. Inner Strength in Women: Metasynthesis of  
41  
42 Qualitative Findings in Theory Development. *J Theory Constr Test* 2002;**6**:86.  
43  
44  
45 46 Janssen BM, Van Regenmortel T, Abma TA. Identifying sources of strength:  
46  
47 Resilience from the perspective of older people receiving long-term community  
48  
49 care. *Eur J Ageing* 2011;**8**:145–56. doi:10.1007/s10433-011-0190-8  
50  
51  
52  
53  
54  
55  
56  
57  
58  
59  
60

- 1  
2  
3  
4 47 Duan W, Ho SMY. Three-Dimensional Model of Strengths: Examination of  
5  
6 Invariance Across Gender, Age, Education Levels, and Marriage Status.  
7  
8  
9 *Community Ment Health J* 2017;**53**:233–40. doi:10.1007/s10597-016-0038-y  
10  
11 48 Niemiec RM. Six Functions of Character Strengths for Thriving at Times of  
12  
13 Adversity and Opportunity: a Theoretical Perspective. *Appl Res Qual Life*  
14  
15 2020;**15**:551–72. doi:10.1007/s11482-018-9692-2  
16  
17  
18  
19 49 Park N, Peterson C, Seligman MEP. Strengths of character and well-being. *J*  
20  
21 *Soc Clin Psychol* 2004;**23**:603–19. doi:10.1521/jscp.23.5.603.50748  
22  
23  
24  
25  
26  
27  
28  
29  
30  
31  
32  
33  
34  
35  
36  
37  
38  
39  
40  
41  
42  
43  
44  
45  
46  
47  
48  
49  
50  
51  
52  
53  
54  
55  
56  
57  
58  
59  
60

Standards for Reporting Qualitative Research (SRQR)—checklist of items that should be included in reports of Qualitative studies

|                                              | Item No | Recommendation                                                                                                                                                                                                                                                                                                                                   | Page No |
|----------------------------------------------|---------|--------------------------------------------------------------------------------------------------------------------------------------------------------------------------------------------------------------------------------------------------------------------------------------------------------------------------------------------------|---------|
| <b>Title and abstract</b>                    |         |                                                                                                                                                                                                                                                                                                                                                  |         |
| <b>Title</b>                                 | 1       | Concise description of the nature and topic of the study Identifying the study as qualitative or indicating the approach (e.g., ethnography, grounded theory) or data collection methods (e.g., interview, focus group) is recommended                                                                                                           | 1       |
| <b>Abstract</b>                              | 2       | Summary of key elements of the study using the abstract format of the intended publication; typically includes background, purpose, methods, results, and conclusions                                                                                                                                                                            | 2       |
| <b>Introduction</b>                          |         |                                                                                                                                                                                                                                                                                                                                                  |         |
| Problem formulation                          | 3       | Description and significance of the problem/phenomenon studied; review of relevant theory and empirical work; problem statement                                                                                                                                                                                                                  | 4       |
| Purpose or research question                 | 4       | Purpose of the study and specific objectives or questions                                                                                                                                                                                                                                                                                        | 6       |
| <b>Methods</b>                               |         |                                                                                                                                                                                                                                                                                                                                                  |         |
| Qualitative approach and research paradigm   | 5       | Qualitative approach (e.g., ethnography, grounded theory, case study, phenomenology, narrative research) and guiding theory if appropriate; identifying the research paradigm (e.g., postpositivist, constructivist/interpretivist) is also recommended; rationale <sup>b</sup>                                                                  | 7       |
| Researcher characteristics and reflexivity   | 6       | Researchers' characteristics that may influence the research, including personal attributes, qualifications/experience, relationship with participants, assumptions, and/or presuppositions; potential or actual interaction between researchers' characteristics and the research questions, approach, methods, results, and/or transferability | 8       |
| Context                                      | 7       | Setting/site and salient contextual factors; rationale <sup>b</sup>                                                                                                                                                                                                                                                                              | 9       |
| Sampling strategy                            | 8       | How and why research participants, documents, or events were selected; criteria for deciding when no further sampling was necessary (e.g., sampling saturation); rationale <sup>b</sup>                                                                                                                                                          | 7       |
| Ethical issues pertaining to human subjects  | 9       | Documentation of approval by an appropriate ethics review board and participant consent, or explanation for lack thereof; other confidentiality and data security issues                                                                                                                                                                         | 12      |
| Data collection methods                      | 10      | Types of data collected; details of data collection procedures including (as appropriate) start and stop dates of data collection and analysis, iterative process, triangulation of sources/methods, and modification of procedures in response to evolving study findings; rationale <sup>b</sup>                                               | 8       |
| Data collection instruments and technologies | 11      | Description of instruments (e.g., interview guides, questionnaires) and devices (e.g., audio recorders) used for data collection; if/how the instrument(s) changed over the course of the study                                                                                                                                                  | 9       |
| Units of study                               | 12      | Number and relevant characteristics of participants, documents, or events included in the study; level of participation (could be reported in results)                                                                                                                                                                                           | 13      |
| Data processing                              | 13      | Methods for processing data prior to and during analysis, including transcription, data entry, data management and security, verification of data integrity, data coding, and anonymization/deidentification of excerpts                                                                                                                         | 9       |



|                                                                                              |    |                                                                                                                                                                                                                                                                                                       |       |
|----------------------------------------------------------------------------------------------|----|-------------------------------------------------------------------------------------------------------------------------------------------------------------------------------------------------------------------------------------------------------------------------------------------------------|-------|
| Data analysis                                                                                | 14 | Process by which inferences, themes, etc., were identified and developed, including the researchers involved in data analysis; usually references a specific paradigm or approach; rationale <sup>b</sup>                                                                                             | 10    |
| Techniques to enhance trustworthiness                                                        | 15 | Techniques to enhance trustworthiness and credibility of data analysis (e.g., member checking, audit trail, triangulation); rationale <sup>b</sup>                                                                                                                                                    | 12    |
| (Table continues)                                                                            |    |                                                                                                                                                                                                                                                                                                       |       |
| <b>Results /findings</b>                                                                     |    |                                                                                                                                                                                                                                                                                                       |       |
| Synthesis and interpretation                                                                 | 16 | Main findings (e.g., interpretations, inferences, and themes); might include development of a theory or model, or integration with prior research or theory                                                                                                                                           | 14-22 |
| Links to empirical data                                                                      | 17 | Evidence (e.g., quotes, field notes, text excerpts, photographs) to substantiate analytic findings                                                                                                                                                                                                    | 16-18 |
| <b>Discussion</b>                                                                            |    |                                                                                                                                                                                                                                                                                                       |       |
| Integration with prior work, implications, transferability, and contribution(s) to the field | 18 | Short summary of main findings; explanation of how findings and conclusions connect to, support, elaborate on, or challenge conclusions of earlier scholarship; discussion of scope of application/generalizability; identification of unique contribution(s) to scholarship in a discipline or field | 22-25 |
| Limitations                                                                                  | 19 | Trustworthiness and limitations of findings                                                                                                                                                                                                                                                           | 27    |
| <b>Other</b>                                                                                 |    |                                                                                                                                                                                                                                                                                                       |       |
| Conflicts of interest                                                                        | 20 | Potential sources of influence or perceived influence on study conduct and conclusions; how these were managed                                                                                                                                                                                        | 29    |
| Funding                                                                                      | 21 | Sources of funding and other support; role of funders in data collection, interpretation, and reporting                                                                                                                                                                                               | 29    |

<sup>a</sup>The authors created the SRQR by searching the literature to identify guidelines, reporting standards, and critical appraisal criteria for qualitative research; reviewing the reference lists of retrieved sources; and contacting experts to gain feedback. The SRQR aims to improve the transparency of all aspects of qualitative research by providing clear standards for reporting qualitative research.

<sup>b</sup>The rationale should briefly discuss the justification for choosing that theory, approach, method, or technique rather than other options available, the assumptions and limitations implicit in those choices, and how those choices influence study conclusions and transferability. As appropriate, the rationale for several items might be discussed together.

**Note:** BC O'Brien, Harris, I. B. , Beckman, T. J. , Reed, D. A. , & Cook, D. A. . (2014). Standards for reporting qualitative research: a synthesis of recommendations. *Academic Medicine*, 89(9), 1245-1251.
